# Supplementary material for: Japan’s greenhouse gas reduction scenarios toward net zero by 2050 in the material cycles and waste management sector
Source: Springer Nature journal article supplement (doi:10.1007/s10163-023-01650-7), 2023-04-25
Supplement: MOESM4 [file 25283090]

## Sheet: AD_Landfill
	Amount directly landfilled by municipal waste composition
		unit																								1990	1991	1992	1993	1994	1995	1996	1997	1998	1999	2000	2001	2002	2003	2004	2005	2006	2007	2008	2009	2010	2011	2012	2013
	Food waste	kt / year (wet)																								1678	1622	1244	1374	1127	1048	933	780	716	712	730	642	505	474	439	209	188	136	93	71	67.6223	61	55	54
	Wood, bamboo and straw	kt / year (wet)																								623	402	316	341	291	273	262	237	206	173	141	117	97	105	118	68	75	61	39	30	25	19	19	89
	Paper/ cardboard	kt / year (wet)																								1382.54	1369.81	1100.58	1179.71	995.976	973.237	880.461	756.76	694	671	678	620	518	513	490	311	255	65	183	151	142	127	126	127
	Textile	kt / year (wet)																								137.457	136.191	109.423	117.291	99.0236	96.7628	87.5387	75.2398	69	64	56	53	47	51	53	37	21	9	13	10	8	6	5	5
	Amount landfilled after intermediate treatment by municipal waste composition
		unit																								1990	1991	1992	1993	1994	1995	1996	1997	1998	1999	2000	2001	2002	2003	2004	2005	2006	2007	2008	2009	2010	2011	2012	2013
	Food waste	kt / year (wet)																								16.7833	33.357	34.5759	36.5092	39.0912	40.1856	42.2565	44.5961	49	51	55	51	44	43	43	103	82	59	60	47	52	48	34	29
	Wood, bamboo and straw	kt / year (wet)																								37.6769	74.883	77.6194	81.9593	87.7558	90.2127	94.8616	100.114	110	122	141	102	89	79	90	79	84	89	58	46	47	47	38	30
	Paper/ cardboard	kt / year (wet)																								42.1296	83.7328	86.7926	91.6454	98.1269	100.874	106.072	111.945	123	162	194	214	203	173	79	304	393	272	287	224	247	241	199	155
	Textile	kt / year (wet)																								8.22041	16.3381	16.9351	17.882	19.1467	19.6828	20.6971	21.843	24	30	36	50	60	85	123	141	50	68	14	1	0	11	8	6
	Amount directly landfilled by industrial waste composition
		unit																								1990	1991	1992	1993	1994	1995	1996	1997	1998	1999	2000	2001	2002	2003	2004	2005	2006	2007	2008	2009	2010	2011	2012	2013
	Animal and vegetable residues	kt / year (wet)																								168	298	464	399	367	407	519	352.794	444	413	196	212	221	175	94	55	59	41	14	14	13	12	13	12
	Animal carcasses	kt / year (wet)																								11	2	4	5	50	80	53	55.782	25	31	18	26	21	25	20	15	16	6	2	2	2	1	2	1
	Food waste	kt / year (wet)																								179	300	468	404	417	487	572	408.576	470	444	214	238	242	200	114	70	75	47	16	16	15	13	15	13
	Paper/ cardboard	kt / year (wet)																								86	201	126	150	114	105	110	121.766	114.982	93	81	86	78	52	55	49	50	35	13	14	4	11	4	6
	Textile	kt / year (wet)																								3	5	5	6	13	12	10	10.345	17.969	14	12	12	11	12	8	7	6	5	4	2	2	3	2	2
	Wood	kt / year (wet)																								562	1058	1022	958	790	593	399	340	289.75	255	260	255	236	206	260	208	184	113	57	65	34	70	28	44
	Livestock waste	kt / year (wet)																								1.30439	1.29929	1.29228	1.29993	1.27979	1.24985	1.2259	1.19404	1.18092	1.16614	1.15301	1.14796	1.14421	1.06961	1.11729	1.11114	1.11584	1.1146	2	1	0	1	26	8
	Amount landfilled after intermediate treatment by industrial waste composition
		unit																								1990	1991	1992	1993	1994	1995	1996	1997	1998	1999	2000	2001	2002	2003	2004	2005	2006	2007	2008	2009	2010	2011	2012	2013
	Food waste	kt / year (wet)																								51.4345	86.2031	134.477	116.087	119.822	139.936	164.361	117.402	135.052	119.225	80.7967	84.4749	92.7178	107.16	75.4985	69.0309	59	38.6969	52.8462	49.258	44.9563	54.8507	77.8179	21.4718
	Paper/ cardboard	kt / year (wet)																								34.1757	79.8757	50.0714	59.6088	45.3027	41.7261	43.7131	48.3888	45.6929	34.2875	80.1159	78.0232	77.9928	50.83	40.9957	55.3115	64	73.6626	60.6412	38.0146	32.4661	32.8466	33.6659	13.2076
	Textile	kt / year (wet)																								1.74539	2.90899	2.90899	3.49078	7.56336	6.98157	5.81797	6.01869	10.4543	7.075	5.27439	5.40154	4.53438	6.95281	8.4997	13.5624	13	9.53117	6.47437	5.50146	5.7233	8.42741	5.75754	5.36794
	Wood	kt / year (wet)																								282.783	532.357	514.243	482.04	397.507	298.382	200.766	171.079	145.794	112.838	167.057	161.969	159.391	171.943	211.229	210.214	238	209.642	217.443	163.085	229.607	200.798	164.299	157.496
	Sewage sludge	kt / year (wet)																								1114.17	1097.06	1077.25	1022.81	1028.95	948.544	868.135	720.196	680.482	745.853	596.866	380.226	341.588	337.686	315.422	248.656	154.021	108.984	91.351	83.67	82.233	144.653	101.513	68.0144
	Waterworks sludge	kt / year (dry)																								199.03	189.617	191.862	171.964	166.623	165.985	149.567	147.554	123.07	127.394	146.098	131.622	98.9061	69.8322	71.3877	66.0362	61.6887	67.2936	67.2936	67.2936	67.2936	67.2936	67.2936	67.2936
	Organic sludge from manufacturing industries	kt / year (dry)																								340.485	302.646	264.808	226.969	160.506	156.332	113.952	144.297	106.367	67.8168	69.3582	89.7518	97.7069	67.8469	63.7535	48.2842	39.4866	33.9357	22.5002	21.7656	30.8354	38.6217	27.2755	16.7412
	Livestock waste	kt / year (wet)																								40.3645	40.2067	39.9899	40.2265	39.6035	38.6769	37.9356	36.9498	36.5437	36.0863	35.6802	35.5239	35.4077	33.0993	34.5748	34.3844	34.5299	34.4916	35	46	35	35	16	35
[truncated: 37 more columns]

## Sheet: AD_Biological treatment
	Amount of municipal waste composting (amount of waste sent)
		unit																								1990	1991	1992	1993	1994	1995	1996	1997	1998	1999	2000	2001	2002	2003	2004	2005	2006	2007	2008	2009	2010	2011	2012	2013
	Food waste	kt / year (wet)																								35.2	22.8	23.2	25.2	19.6	20	20	21.6	25	24.8585	29.455	27.8375	27.0684	28.0922	25.9693	65.835	81.075	93.525	98.872	108.072	117.315	142.968	120.32	121.346
	Paper/ cardboard	kt / year (wet)																								28.16	18.24	18.56	20.16	15.68	16	16	17.28	20	19.4376	22.5365	21.8115	22.5351	25.2402	23.7283	NO	NO	NO	NO	NO	NO	NO	NO	NO
	Textile	kt / year (wet)																								2.904	1.881	1.914	2.079	1.617	1.65	1.65	1.782	2.0625	1.76705	1.781	1.6375	1.6425	1.7112	0.527296	NO	NO	NO	NO	NO	NO	NO	NO	NO
	Wood（garden and park waste）	kt / year (wet)																								8.184	5.301	5.394	5.859	4.557	4.65	4.65	5.022	5.8125	4.4925	3.9045	3.7335	3.7449	4.7771	5.66843	33.165	33.925	35.475	37.128	43.928	47.685	41.032	39.68	44.654
	Human waste/Johkasou sludge	kt / year (wet)																								NO	NO	NO	NO	NO	NO	NO	NO	NO	NO	NO	NO	NO	NO	NO	4	7	11	28	58	17	15	21	19
	Amount of industrial waste composting（amount of waste sent）
		unit																								1990	1991	1992	1993	1994	1995	1996	1997	1998	1999	2000	2001	2002	2003	2004	2005	2006	2007	2008	2009	2010	2011	2012	2013
	Food waste (incl. additives)	kt / year (wet)																								2062.86	2062.86	2062.86	2062.86	2062.86	2062.86	2062.86	2062.86	2062.86	2062.86	2062.86	2062.86	2685.71	3200	3312.86	3747.14	3825.71	3662.86	4145.71	4051.43	3564.29	3922.86	3920	3882.86
	Sewage sludge (incl. additives)	kt / year (wet)																								117.577	116.542	120.571	122.049	121.647	125.921	131.509	138.943	120.77	131.039	135.108	158.238	145.999	134.109	135.683	147.244	178.713	184.701	170.157	185.646	143.681	168.33	145.006	135.981
[truncated: 37 more columns]

## Sheet: AD_Incin & raw mat or fuel
	Municipal waste incineration by facility
			unit																							1990	1991	1992	1993	1994	1995	1996	1997	1998	1999	2000	2001	2002	2003	2004	2005	2006	2007	2008	2009	2010	2011	2012	2013
	continuous incineration facility		kt / year (wet)																							26215	27144.4	27618.9	28191.7	29010.2	29716	30654.2	31488.4	31720.8	32147.4	32749.1	32842.3	33298.7	33112.4	32372.8	32245.5	31961.8	30840.2	29425.8	28443.7	27603.3	27891.9	28701.8	28245.9
	semi-continuous incineration facility		kt / year (wet)																							4809.7	4980.86	5068.55	5174.3	5325.16	5455.36	5628.25	5782.07	5891.56	5851.72	5882.41	6019.09	5249.12	4860.71	4462.79	4046.9	3852.5	3608.96	3338.83	3155.38	2967.61	2932.33	2848.97	2826.55
	Batch type incineration facility		kt / year (wet)																							5643.34	5449.71	5152.58	4867.04	4612.67	4327.65	4062.56	3768.51	3503.84	3240.91	3131.01	2918.99	2268.09	1842.08	1772.62	1562.28	1470	1369.48	1345.99	1144.06	1077.96	1057.44	1061.23	970.097
	gasification melting furnace		kt / year (wet)																							0	0	0	0	0	0	0	0	281.742	304.943	370.449	404.84	1157.46	2117.82	2332.48	2396.59	2629.55	2954.39	3122.33	3245.37	3604.7	3857.35	4121.99	4098.42
	Municipal waste incineration by waste composition
			unit																							1990	1991	1992	1993	1994	1995	1996	1997	1998	1999	2000	2001	2002	2003	2004	2005	2006	2007	2008	2009	2010	2011	2012	2013
	Plastics	Fossil-fuel derived	kt / year (wet)																							4697.21	4748.91	4730.11	4720.71	4791.2	4887.55	5077.88	5175.39	5381	5436	5699	5747.1	5612.4	5498	5061.3	4124.68	3379.26	3151.74	3563.54	3063.37	2713.89	2957.74	3456.59	3460.18
		Biogenic	kt / year (wet)																							0	0	0	0	0	0	0	0	0	0	0	0	0	0	0	4.21874	3.83098	4.08243	4.45425	4.42709	4.39947	6.24872	8.39248	14.7586
	PET bottles	Fossil-fuel derived	kt / year (wet)																							299.786	303.091	301.89	302.289	306.795	312.454	325.122	330.606	344	377	450	431.9	530.07	557	516.7	305.7	226.4	250.837	131	159.8	189.2	217	211	229.611
		Biogenic	kt / year (wet)																							0	0	0	0	0	0	0	0	0	0	0	0	0	0	0	0	0	0	0	0	0	0	0	0.388372
	Food waste		kt / year (wet)																							13881.9	14255.3	14380.2	14556.4	14837	15033.8	15315.6	15574.6	15636	16221	17029	16910	16288	15511	15155	14728.8	14917.4	15459.3	14429.7	14140.3	13365.8	13647	13615	13328
	Paper/ cardboard		kt / year (wet)																							11445.7	11753.6	11856.6	12001.9	12233.2	12395.4	12627.8	12841.4	12892	13188	13579	13856	14200	14562	14332	13990.8	13308.6	13167.3	12383.8	11437.6	11808.9	12245	12734	12351
	Wood		kt / year (wet)																							3418.97	3510.95	3541.72	3585.11	3654.2	3702.67	3772.09	3835.89	3851	3321	2528	2448	2438	2808	3442	4107.4	4984.7	4284.81	3572.9	3734.5	3485.1	3294	3362	3503
	Synthetic textiles		kt / year (wet)																							594.583	621.024	643.878	618.304	636.066	664.298	691.764	729.118	729.628	700.853	590.992	581.541	619.667	640.92	391.468	739.806	881.193	749.655	948.16	1062.81	970.117	850.648	747.017	724.21
	Textiles (natural fiber)		kt / year (wet)																							616.396	622.532	610.576	651.521	658.229	647.165	644.285	629.529	634.372	601.147	514.008	524.828	567.333	563.08	330.532	661.694	760.207	607.055	749.44	813.887	657.983	496.352	418.983	445.79
	Municipal waste incineration (individual accounting)
			unit																							1990	1991	1992	1993	1994	1995	1996	1997	1998	1999	2000	2001	2002	2003	2004	2005	2006	2007	2008	2009	2010	2011	2012	2013
	Nappies		kt / year (dry)																							272	270	285	307	328	333	356	376	347	348.043	340.18	343.372	368.09	439.401	444.906	442.031	448.703	457.831	469.179	478.665	483.281	493.484	505.103	514.92
	Industrial waste incineration
			unit																							1990	1991	1992	1993	1994	1995	1996	1997	1998	1999	2000	2001	2002	2003	2004	2005	2006	2007	2008	2009	2010	2011	2012	2013
	Waste oil	Fossil-fuel derived	kt / year (wet)																							1258.27	1313.71	1537.53	1344.53	1710.01	1498.46	1411.08	1439.1	1436.01	1435.34	1645.57	1488.89	1496.99	1436.46	1422.05	1492.78	1434.78	1444.54	1282.84	1104.23	1467.15	1409.81	1545.98	1296.75
		Biogenic	kt / year (wet)																							40.3221	44.9228	54.9108	52.2142	68.7745	68.8602	70.3064	80.1909	79.5148	86.1717	103.407	97.7573	102.531	102.477	105.522	115.069	114.751	119.736	139.163	112.767	120.847	110.193	117.017	103.25
	Waste plastics	Fossil-fuel derived	kt / year (wet)																							842.306	801.206	954.106	1087.21	1579.96	1793.83	1702.52	2064.17	2227.44	1983.17	1779.8	1677.79	1612.87	1795.73	1823.16	1807.62	1744.53	1919.29	2118	1490.5	1701.23	1508.91	1629.32	1774.86
		Biogenic	kt / year (wet)																							0	0	0	0	0	0	0	0	0	0	0	0	0	0	0	0.000242871	0.000234658	0.000246709	0.000273691	0.00022085	1.76709	2.08679	2.68252	3.14411
	Animal and vegetable residues・Animal carcasses		kt / year (wet)																							77	65	75	88	109	125	124	107	181	168	272	275	322	187	175	167	186	153.52	220	181	190	184	153	151
	Paper/ cardboard		kt / year (wet)																							335.314	87.3139	71.3139	106.314	480.114	711.708	388.427	735.244	949.56	770.611	718.288	730.168	707.364	453.277	364.813	322.776	321.741	140.606	494	298.5	292	225	349	152
	Wood		kt / year (wet)																							2679	2462	2979	2865	3968	4744	5431	4674	4172	3794	3114	2922	2425	2222	2034	1865	1660	1659.08	1313	1283	1101	1135	1181	1388
	Textiles (natural fiber)		kt / year (wet)																							31	31	28	33	38	49	49	41	52	57	50	51	46	40	36	43	36	35.9379	33	26	24	26	24	35
	Sewage sludge	High-molecular weight flocculant, Fluidized bed incinerator, Normal temperature combustion (around 800℃)	kt / year (wet)																							1112	1277	1441	1446	1750	1869	2114	2298	2353	2447	2397	2271	2532.3	2692.7	2669.13	2838.55	2473.97	1935.08	1785.4	1663.66	1534.93	1531.84	1552.04	1549.35
		High-molecular weight flocculant, Fluidized bed incinerator, High temperature combustion (around 850℃)	kt / year (wet)																							128	113	129	134	160	219	267	337	377	599	723	1029	1125	1219	1444.51	1469.02	1780.65	2354.71	2469.59	2507.55	2580.84	2587.05	2640.91	2643.91
		High-molecular weight flocculant, Multiple hearth	kt / year (wet)																							560	520	610	600	490	656	723	695	528	620	572	661	424.4	207.5	117.726	101.769	88.423	69.352	56.074	64.147	61.4115	51.7197	42.9591	39.657
		Lime sludge	kt / year (wet)																							1009.89	855.968	936.384	782.889	754.892	663.199	353.671	225.24	436.883	228.197	272.302	347.963	403.938	415.324	229.408	289.403	218.644	210.969	193.461	142.287	108.562	83.0586	73.9731	21.72
		Other	kt / year (wet)																							55.411	35.691	75.181	80.279	81.819	161.13	132.584	126.031	127.625	121.947	174.602	71.945	118.01	28.3594	25.7963	8.4893	10.9286	11.6583	0.51706	0.88884	0.757	2.62859	0.46817	11.6814
		Multiple hearth air injection incineration method fluidized bed incinerator, Two-stage incineration method circulating fluidized bed incinerator and Stoker furnace, High temperature combustion (around 850℃)	kt / year (wet)																							194.702	198.341	198.435	216.832	243.289	258.671	256.745	232.729	231.492	218.856	161.096	171.092	181.452	271.117	258.632	280.367	288.391	237.732	232.788	281.714	337.687	438.741	443.557	564.671
		Sewage sludge・Carbonization furnace for solid fuel production	kt / year (wet)																							0	0	0	0	0	0	0	0	0	0	0	0	0	0	0	0	0	0	54.5939	71.1661	70.11	39.3202	63.353	103.211
	Sludge other than sewage sludge (organic sludge from manufacturing industries)		kt / year (wet)																							1972.45	1982.47	1992.49	2002.51	2012.53	2022.55	2032.57	2042.59	2042.59	2021	2071	1697.75	1736.35	1975.78	2370	2287.81	2253.29	2274.98	2082	2106	2010	2020	1713	1954
	Specially-controlled industrial waste	Waste oil (flammable waste oil and specified hazardous industrial waste oil)	kt / year (wet)																							256.406	256.406	256.406	256.406	276.069	380.413	406.606	530.4	423.475	487.487	560.367	508.355	512.48	493.068	489.428	515.149	496.465	501.188	903	667	431	321	292	325
		Infectious waste (plastics)	kt / year (wet)																							77.6939	77.6939	77.6939	77.6939	68.9366	127.869	388.575	124.502	120.556	185.828	166.772	157.213	151.13	168.265	170.835	169.379	163.467	179.842	131	142.5	154	176	131	133
		Infectious waste (other than plastics)	kt / year (wet)																							104.686	104.686	104.686	104.686	92.8864	172.292	523.573	167.756	162.44	250.389	224.712	211.832	203.636	226.723	230.187	228.224	220.259	242.323	91	98.5	106	121	90	92
	Open burned industrial waste		kt / year (wet)																							72.221	72.221	72.221	72.221	72.221	72.221	72.221	45.835	39.983	42.529	28.887	9.997	5.7	5.04	3.399	3.469	2.538	2.977	1.737	1.672	1.284	1.15	0.918	1.331
	Percentage of incineration with energy recovery
			unit																							1990	1991	1992	1993	1994	1995	1996	1997	1998	1999	2000	2001	2002	2003	2004	2005	2006	2007	2008	2009	2010	2011	2012	2013
	Municipal waste		%																							0.537427	0.545834	0.545073	0.54372	0.540628	0.556363	0.559103	0.567179	0.580995	0.586918	0.610568	0.632755	0.660889	0.67703	0.67713	0.683572	0.678588	0.674327	0.683882	0.66145	0.669184	0.651744	0.677239	0.664434
	Industrial waste	Waste oil	%																							0.00561826	0.00528237	0.00741494	0.00685262	0.0058301	0.00680155	0.00659356	0.00680012	0.00602102	0.00582235	0.00575509	0.0124395	0.0132257	0.0131239	0.0133433	0.0247984	0.024785	0.0181541	0.0195034	0.0205961	0.0408877	0.041026	0.0230567	0.0399096
		Waste plastics	%																							0.0143503	0.0139777	0.0166347	0.0150193	0.0132289	0.0142522	0.0140397	0.0363688	0.0488656	0.0426533	0.0412122	0.0431734	0.0436859	0.039363	0.0551423	0.0662069	0.0719281	0.105305	0.137173	0.0917736	0.133027	0.17759	0.175006	0.1335
		paper/ cardboard	%																							0.00192419	0.00593227	0.00804742	0.00770662	0.00723901	0.00758062	0.0073609	0.0118512	0.0111904	0.0110784	0.0109956	0.0119407	0.0119658	0.0114052	0.012532	0.0153058	0.0182153	0.0386567	0.0463489	0.0482832	0.0591971	0.15732	0.130752	0.0849369
		Wood	%																							0.00192419	0.00593227	0.00804742	0.00770662	0.00723901	0.00758062	0.0073609	0.0118512	0.0111904	0.0110784	0.0109956	0.0119407	0.0119658	0.0114052	0.012532	0.0153058	0.0182153	0.0386567	0.0463489	0.0482832	0.0591971	0.15732	0.130752	0.0849369
		Textile	%																							0.00192419	0.00593227	0.00804742	0.00770662	0.00723901	0.00758062	0.0073609	0.0118512	0.0111904	0.0110784	0.0109956	0.0119407	0.0119658	0.0114052	0.012532	0.0153058	0.0182153	0.0236271	0.0115183	0.0250806	0.0149884	0.0215505	0.0180236	0.0193652
		Sewage sludge	%																							0	0	0	0	0	0	0	0	0	0	0	0	0	0	0	0	0	0	0	0	0	0	0	0
		Other organic sludge	%																							0.00916692	0.00866828	0.00919036	0.00876542	0.00839537	0.0082739	0.00815497	0.00835254	0.00766586	0.010063	0.00974344	0.0107738	0.0104723	0.00979737	0.010001	0.0113753	0.0164137	0.00656847	0.0149973	0.021334	0.0216943	0.0298893	0.0343982	0.083004
		Animal and vegetable residues・Animal carcasses	%																							0.00192419	0.00593227	0.00804742	0.00770662	0.00723901	0.00758062	0.0073609	0.0118512	0.0111904	0.0110784	0.0109956	0.0119407	0.0119658	0.0114052	0.012532	0.0153058	0.0182153	0.0236271	0.0115183	0.0250806	0.0149884	0.0215505	0.0180236	0.0193652
	Municipal waste used for energy
			unit																							1990	1991	1992	1993	1994	1995	1996	1997	1998	1999	2000	2001	2002	2003	2004	2005	2006	2007	2008	2009	2010	2011	2012	2013
	Plastics derived from municipal waste（Fossil-fuel derived）	Liquefaction	kt / year (dry)																							0	0	0	0	0	0	0	0	0	0	3.22656	7.66176	6.55776	5.61312	6.16896	6.70641	4.20866	4.08239	2.61752	6.4505	1.01308	0	0	0
		Blast furnace reducing agent	kt / year (dry)																							0	0	0	0	0	0	0	0	0	0	24.1177	41.1166	45.1439	57.173	53.9627	35.2956	37.3206	31.4872	16.6332	26.4559	25.5961	24.7517	24.9539	29.1445
		Coke oven chemical feedstock	kt / year (dry)																							0	0	0	0	0	0	0	0	0	0	10.4684	49.8304	88.476	117.68	133.374	168.049	149.583	136.681	135.754	143.629	169.498	162.187	164.106	0
		Gasification	kt / year (dry)																							0	0	0	0	0	0	0	0	0	0	0.61248	7.22784	10.7405	26.953	50.1149	56.2378	52.3173	54.1995	44.7587	42.7378	50.786	49.2053	58.9723	55.8975
	Plastics derived from municipal waste（Biogenic）	Liquefaction	kt / year (dry)																							0	0	0	0	0	0	0	0	0	0	0	0	0	0	0	0.00686637	0.00477666	0.00529476	0.00327587	0.00933557	0.00164495	0	0	0
		Blast furnace reducing agent	kt / year (dry)																							0	0	0	0	0	0	0	0	0	0	0	0	0	0	0	0.0361374	0.0423573	0.0408381	0.0208166	0.0382887	0.0415609	0.0524028	0.0607347	0.124841
		Coke oven chemical feedstock	kt / year (dry)																							0	0	0	0	0	0	0	0	0	0	0	0	0	0	0	0.172057	0.16977	0.177272	0.169898	0.207869	0.275217	0.343373	0.399413	0
		Gasification	kt / year (dry)																							0	0	0	0	0	0	0	0	0	0	0	0	0	0	0	0.0575791	0.0593779	0.0702955	0.0560162	0.0618528	0.0824624	0.104175	0.143531	0.239439
	Industrial waste used for energy
			unit																							1990	1991	1992	1993	1994	1995	1996	1997	1998	1999	2000	2001	2002	2003	2004	2005	2006	2007	2008	2009	2010	2011	2012	2013
	Waste tire	Cement burning	kt / year (wet)																							111	151	169	222	248	275	276	272	271	297	361	316	284	240	213	181	168	148	141	112	95	77	66	62
		Medium and small boilers	kt / year (wet)																							119	109	110	109	118	126	123	118	108	91	75	70	66	23	15	12	11	11	12	9	8	6	6	6
		Iron manufacture	kt / year (wet)																							0	0	0	0	0	0	0	0	0	43	57	90	55	48	52	51	49	40	39	28	30	31	30	27
		Gasification furnace	kt / year (wet)																							0	0	0	0	0	0	0	0	0	0	0	0	0	0	8	27	34	42	48	48	49	45	45	44
		Metal refining	kt / year (wet)																							67	67	53	45	36	37	38	43	32	34	30	30	26	20	11	10	8	8	2	1	1	1	0	0
		Tire manufacturere	kt / year (wet)																							0	0	9	9	21	32	44	44	40	40	39	55	56	42	30	24	22	18	19	18	23	20	27	27
		Paper manufacture	kt / year (wet)																							0	0	25	26	29	26	28	27	37	32	42	70	86	70	130	210	274	328	339	349	388	377	363	372
		Power generation (other than tire manufacturers)	kt / year (wet)																							0	0	0	0	0	0	0	8	7	9	7	6	6	8	9	9	9	12	24	11	9	32	37	40
	RDF		kt / year (wet)																							33.5872	33.5872	33.5872	33.5872	33.5872	38.8222	43.6281	61.9077	79.488	128.849	148.231	175.452	241.888	326.901	384.521	414.801	395.372	397.101	385.916	376.2	380.342	389.235	384.172	386.381
	RPF	Petroleum product manufacturer	kt / year (wet)																							0	0	0	0	0	0	0	0.091	0.174	0.168	0.445	0.589	4.404	7.282	5.983	4.642	7.203	3.807	2.544	3.356	4.177	3.331	4.006	3.2693
		Chemical industry	kt / year (wet)																							0	0	0	0	0	0	0	0	5.193	7.525	7.473	6.809	7.156	10.9779	11.7428	15.2883	19.9076	21.7136	22.0677	24.7631	22.3501	26.2545	26.655	25.5791
		Paper industry	kt / year (wet)																							0	0	0	5.17113	7.09278	8.12268	6.40206	6.76495	6.21959	9.73608	25.068	65.5588	103.41	172.15	293.106	464.866	632.844	745.215	732.936	797.108	803.378	839.997	876.895	926.243
		Cement manufacturer	kt / year (wet)																							0	0	0	0	0	0	0	0	0	0	0.233	0.48	3.666	5.222	5.015	8.151	7.443	6.861	16.2745	21.0461	15.3787	16.15	13.855	15.808
	Wood		kt / year (wet)																							1634.6	1634.6	1634.6	1634.6	1634.6	1634.6	1634.6	1634.6	1490	1620	2061	1439	1563	2377	2533	2683	2841	3044.76	3724	3918	3900	4065	4151	4425
[truncated: 37 more columns]

## Sheet: AD_Wastewater
	Volume of human waste
		unit																								1990	1991	1992	1993	1994	1995	1996	1997	1998	1999	2000	2001	2002	2003	2004	2005	2006	2007	2008	2009	2010	2011	2012	2013
	Human waste from vault toilet	kt（wet）																								20406	20371	19716	19412	18632	18049	17726	16973	16368	15311.7	14673	14101	12720	12390	11269	10400	9864	9261	8894	8353	7917	7365	7018	6771
	Johkasou sludge	kt（wet）																								9224	9695	10266	10583	11074	11545	12056	12371	12777	13177.7	13234	13596	13686	13797	13744	13790	14089	13987	14064	13989	13760	13547	13519	13726
[truncated: 37 more columns]

## Sheet: EF
	Emission factors
	Landfill
	classification 1	classification 2	classification 3	unit																						1990	1991	1992	1993	1994	1995	1996	1997	1998	1999	2000	2001	2002	2003	2004	2005	2006	2007	2008	2009	2010	2011	2012	2013
	Municipal waste	anaerobic landfill	Food waste	kg CH4/t-dry																						144.82	144.82	144.82	144.82	144.82	144.82	144.82	144.82	144.82	144.82	144.82	144.82	144.82	144.82	144.82	144.82	144.82	144.82	144.82	144.82	144.82	144.82	144.82	144.82
			Paper/ cardboard	kg CH4/t-dry																						136.098	136.098	136.098	136.098	136.098	136.098	136.098	136.098	136.098	136.098	136.098	136.098	136.098	136.098	136.098	136.098	136.098	136.098	136.098	136.098	136.098	136.098	136.098	136.098
			Textile	kg CH4/t-dry																						149.863	149.863	149.863	149.863	149.863	149.863	149.863	149.863	149.863	149.863	149.863	149.863	149.863	149.863	149.863	149.863	149.863	149.863	149.863	149.863	149.863	149.863	149.863	149.863
			Wood	kg CH4/t-dry																						150.538	150.538	150.538	150.538	150.538	150.538	150.538	150.538	150.538	150.538	150.538	150.538	150.538	150.538	150.538	150.538	150.538	150.538	150.538	150.538	150.538	150.538	150.538	150.538
			Waterworks sludge	kg CH4/t-dry																						133.333	133.333	133.333	133.333	133.333	133.333	133.333	133.333	133.333	133.333	133.333	133.333	133.333	133.333	133.333	133.333	133.333	133.333	133.333	133.333	133.333	133.333	133.333	133.333
		Semi-aerobic landfill	Food waste	kg CH4/t-dry																						97.9893	97.9893	97.9893	97.9893	97.9893	97.9893	97.9893	97.9893	97.9893	97.9893	97.9893	97.9893	97.9893	97.9893	97.9893	97.9893	97.9893	97.3816	97.9893	96.5448	94.8095	93.2721	93.2536	94.3226
			Paper/ cardboard	kg CH4/t-dry																						92.0877	92.0877	92.0877	92.0877	92.0877	92.0877	92.0877	92.0877	92.0877	92.0877	92.0877	92.0877	92.0877	92.0877	92.0877	92.0877	92.0877	91.5166	92.0877	90.7302	89.0994	87.6546	87.6372	88.6418
			Textile	kg CH4/t-dry																						101.402	101.402	101.402	101.402	101.402	101.402	101.402	101.402	101.402	101.402	101.402	101.402	101.402	101.402	101.402	101.402	101.402	100.773	101.402	99.9072	98.1114	96.5204	96.5013	97.6076
			Wood	kg CH4/t-dry																						101.859	101.859	101.859	101.859	101.859	101.859	101.859	101.859	101.859	101.859	101.859	101.859	101.859	101.859	101.859	101.859	101.859	101.227	101.859	100.357	98.5534	96.9553	96.9361	98.0473
			Waterworks sludge	kg CH4/t-dry																						90.2174	90.2174	90.2174	90.2174	90.2174	90.2174	90.2174	90.2174	90.2174	90.2174	90.2174	90.2174	90.2174	90.2174	90.2174	90.2174	90.2174	89.6579	90.2174	88.8875	87.2897	85.8743	85.8573	86.8415
	Industrial waste	Anaerobic landfill	Food waste	kg CH4/t-dry																						144.82	144.82	144.82	144.82	144.82	144.82	144.82	144.82	144.82	144.82	144.82	144.82	144.82	144.82	144.82	144.82	144.82	144.82	144.82	144.82	144.82	144.82	144.82	144.82
			Paper/ cardboard	kg CH4/t-dry																						153.333	153.333	153.333	153.333	153.333	153.333	153.333	153.333	153.333	153.333	153.333	153.333	153.333	153.333	153.333	153.333	153.333	153.333	153.333	153.333	153.333	153.333	153.333	153.333
			Textile	kg CH4/t-dry																						149.863	149.863	149.863	149.863	149.863	149.863	149.863	149.863	149.863	149.863	149.863	149.863	149.863	149.863	149.863	149.863	149.863	149.863	149.863	149.863	149.863	149.863	149.863	149.863
			Wood	kg CH4/t-dry																						150.538	150.538	150.538	150.538	150.538	150.538	150.538	150.538	150.538	150.538	150.538	150.538	150.538	150.538	150.538	150.538	150.538	150.538	150.538	150.538	150.538	150.538	150.538	150.538
			Digested sewage sludge	kg CH4/t-dry																						100	100	100	100	100	100	100	100	100	100	100	100	100	100	100	100	100	100	100	100	100	100	100	100
			Other sewage sludge	kg CH4/t-dry																						133.333	133.333	133.333	133.333	133.333	133.333	133.333	133.333	133.333	133.333	133.333	133.333	133.333	133.333	133.333	133.333	133.333	133.333	133.333	133.333	133.333	133.333	133.333	133.333
			Waterworks sludge	kg CH4/t-dry																						20	20	20	20	20	20	20	20	20	20	20	20	20	20	20	20	20	20	20	20	20	20	20	20
			Organic sludge from manufacturing industries	kg CH4/t-dry																						150	150	150	150	150	150	150	150	150	150	150	150	150	150	150	150	150	150	150	150	150	150	150	150
			Livestock waste	kg CH4/t-dry																						133.333	133.333	133.333	133.333	133.333	133.333	133.333	133.333	133.333	133.333	133.333	133.333	133.333	133.333	133.333	133.333	133.333	133.333	133.333	133.333	133.333	133.333	133.333	133.333
		Semi-aerobic landfill	Food waste	kg CH4/t-dry																						83.7781	83.7781	83.7781	83.7781	83.7781	83.7781	83.7781	83.7781	83.7781	83.7781	83.7781	83.7781	83.7781	83.7781	83.7781	83.7781	83.7781	83.7781	82.9816	83.7781	80.9542	82.8368	82.8368	82.8368
			Paper/ cardboard	kg CH4/t-dry																						88.7033	88.7033	88.7033	88.7033	88.7033	88.7033	88.7033	88.7033	88.7033	88.7033	88.7033	88.7033	88.7033	88.7033	88.7033	88.7033	88.7033	88.7033	87.86	88.7033	85.7133	87.7067	87.7067	87.7067
			Textile	kg CH4/t-dry																						86.6958	86.6958	86.6958	86.6958	86.6958	86.6958	86.6958	86.6958	86.6958	86.6958	86.6958	86.6958	86.6958	86.6958	86.6958	86.6958	86.6958	86.6958	85.8716	86.6958	83.7735	85.7217	85.7217	85.7217
			Wood	kg CH4/t-dry																						87.0864	87.0864	87.0864	87.0864	87.0864	87.0864	87.0864	87.0864	87.0864	87.0864	87.0864	87.0864	87.0864	87.0864	87.0864	87.0864	87.0864	87.0864	86.2585	87.0864	84.1509	86.1079	86.1079	86.1079
			Digested sewage sludge	kg CH4/t-dry																						57.85	57.85	57.85	57.85	57.85	57.85	57.85	57.85	57.85	57.85	57.85	57.85	57.85	57.85	57.85	57.85	57.85	57.85	57.3	57.85	55.9	57.2	57.2	57.2
			Other sewage sludge	kg CH4/t-dry																						77.1333	77.1333	77.1333	77.1333	77.1333	77.1333	77.1333	77.1333	77.1333	77.1333	77.1333	77.1333	77.1333	77.1333	77.1333	77.1333	77.1333	77.1333	76.4	77.1333	74.5333	76.2667	76.2667	76.2667
			Waterworks sludge	kg CH4/t-dry																						11.57	11.57	11.57	11.57	11.57	11.57	11.57	11.57	11.57	11.57	11.57	11.57	11.57	11.57	11.57	11.57	11.57	11.57	11.46	11.57	11.18	11.44	11.44	11.44
			Organic sludge from manufacturing industries	kg CH4/t-dry																						86.775	86.775	86.775	86.775	86.775	86.775	86.775	86.775	86.775	86.775	86.775	86.775	86.775	86.775	86.775	86.775	86.775	86.775	85.95	86.775	83.85	85.8	85.8	85.8
			Livestock waste	kg CH4/t-dry																						77.1333	77.1333	77.1333	77.1333	77.1333	77.1333	77.1333	77.1333	77.1333	77.1333	77.1333	77.1333	77.1333	77.1333	77.1333	77.1333	77.1333	77.1333	76.4	77.1333	74.5333	76.2667	76.2667	76.2667
	Source: Table 7-7 Emission factors by type of biodegradable waste and by treatment, Ministry of the Environment, Japan, Greenhouse Gas Inventory Office of Japan, Center for Global Environmental Research, National Institute for Environmental Studies, Japan (2021) National Greenhouse Gas Inventory Report of JAPAN.
	Biological treatment
	classification 1	classification 2	classification 3	unit																						1990	1991	1992	1993	1994	1995	1996	1997	1998	1999	2000	2001	2002	2003	2004	2005	2006	2007	2008	2009	2010	2011	2012	2013
	Common for municipal and industrial waste		High degradable organic waste（food waste、human waste/Johkasou sludge、poultry manure、sewage sludge）	kgCH4/t-wet																						0.96	0.96	0.96	0.96	0.96	0.96	0.96	0.96	0.96	0.96	0.96	0.96	0.96	0.96	0.96	0.96	0.96	0.96	0.96	0.96	0.96	0.96	0.96	0.96
			High degradable organic waste（garden and park waste）	kgCH4/t-wet																						0.35	0.35	0.35	0.35	0.35	0.35	0.35	0.35	0.35	0.35	0.35	0.35	0.35	0.35	0.35	0.35	0.35	0.35	0.35	0.35	0.35	0.35	0.35	0.35
			High degradable organic waste（food waste、human waste/Johkasou sludge、poultry manure、sewage sludge）	kgN2O/t-wet																						0.27	0.27	0.27	0.27	0.27	0.27	0.27	0.27	0.27	0.27	0.27	0.27	0.27	0.27	0.27	0.27	0.27	0.27	0.27	0.27	0.27	0.27	0.27	0.27
			High degradable organic waste（garden and park waste）	kgN2O/t-wet																						0.0015	0.0015	0.0015	0.0015	0.0015	0.0015	0.0015	0.0015	0.0015	0.0015	0.0015	0.0015	0.0015	0.0015	0.0015	0.0015	0.0015	0.0015	0.0015	0.0015	0.0015	0.0015	0.0015	0.0015
	Source: Table 7-20 GHG emission factors for composting (5.B.1) (wet basis), Ministry of the Environment, Japan, Greenhouse Gas Inventory Office of Japan, Center for Global Environmental Research, National Institute for Environmental Studies, Japan (2021) National Greenhouse Gas Inventory Report of JAPAN.
	Incineration（CO2）
	classification 1	classification 2	classification 3	unit																						1990	1991	1992	1993	1994	1995	1996	1997	1998	1999	2000	2001	2002	2003	2004	2005	2006	2007	2008	2009	2010	2011	2012	2013
	Municipal waste		Plastics	kg CO2/t-dry																						2816.1	2816.1	2816.1	2816.1	2816.1	2816.1	2816.1	2816.1	2816.1	2816.1	2816.1	2816.1	2816.1	2816.1	2816.1	2816.1	2816.1	2816.1	2816.1	2816.1	2816.1	2816.1	2816.1	2816.1
			PET bottles	kg CO2/t-dry																						2277	2277	2277	2277	2277	2277	2277	2277	2277	2277	2277	2277	2277	2277	2277	2277	2277	2277	2277	2277	2277	2277	2277	2277
			Paper/ cardboard(Fossil-fuel derived fraction）	kg CO2/t-dry																						143.568	143.568	143.568	143.568	143.568	143.568	143.568	143.568	143.568	143.568	143.568	143.568	143.568	143.568	143.568	143.568	143.568	143.568	143.568	143.568	143.568	143.568	143.568	143.568
			Nappies	kg CO2/t-dry																						1219.89	1219.89	1219.89	1219.89	1219.89	1219.89	1219.89	1219.89	1219.89	1219.89	1219.89	1219.89	1219.89	1219.89	1219.89	1219.89	1219.89	1219.89	1219.89	1219.89	1219.89	1219.89	1219.89	1219.89
			Synthetic textiles	kg CO2/t-dry																						2310	2310	2310	2310	2310	2310	2310	2310	2310	2310	2310	2310	2310	2310	2310	2310	2310	2310	2310	2310	2310	2310	2310	2310
	Industrial waste		Waste oil	kg CO2/t(wet)																						2933.33	2933.33	2933.33	2933.33	2933.33	2933.33	2933.33	2933.33	2933.33	2933.33	2933.33	2933.33	2933.33	2933.33	2933.33	2933.33	2933.33	2933.33	2933.33	2933.33	2933.33	2933.33	2933.33	2933.33
			Waste plastics	kg CO2/t(wet)																						2566.67	2566.67	2566.67	2566.67	2566.67	2566.67	2566.67	2566.67	2566.67	2566.67	2566.67	2566.67	2566.67	2566.67	2566.67	2566.67	2566.67	2566.67	2566.67	2566.67	2566.67	2566.67	2566.67	2566.67
			Paper/ cardboard(Fossil-fuel derived fraction）	kg CO2/t(dry)																						16.8667	16.8667	16.8667	16.8667	16.8667	16.8667	16.8667	16.8667	16.8667	16.8667	16.8667	16.8667	16.8667	16.8667	16.8667	16.8667	16.8667	16.8667	16.8667	16.8667	16.8667	16.8667	16.8667	16.8667
	Source: Table 7-33 Fossil-fuel derived CO2 Emission factors for MSW incineration (dry basis) and Table 7-47 Emission factors for fossil-fuel derived fraction of waste oil, plastics and paper/cardboard in industrial waste (EF), Ministry of the Environment, Japan, Greenhouse Gas Inventory Office of Japan, Center for Global Environmental Research, National Institute for Environmental Studies, Japan …
	Incineration（CH4、N2O）
	classification 1	classification 2	classification 3	unit																						1990	1991	1992	1993	1994	1995	1996	1997	1998	1999	2000	2001	2002	2003	2004	2005	2006	2007	2008	2009	2010	2011	2012	2013
	Municipal waste		Continuous	gCH4/t-wet																						8.21174	8.21174	8.21174	8.21174	8.21174	8.21174	8.21174	8.21174	8.24275	8.26109	8.28032	8.29298	2.59382	2.61385	2.63557	2.62438	2.62251	2.60902	2.62263	2.64934	2.66912	2.68051	2.67748	2.6821
			Semi-continuous	gCH4/t-wet																						69.5602	69.5602	69.5602	69.5602	69.5602	69.5602	69.5602	69.5602	72.1628	72.3968	75.1437	75.2032	19.1077	19.7723	19.8894	19.9017	20.7157	20.8693	21.0107	20.6381	20.9122	20.8468	21.0594	20.8538
			Batch type	gCH4/t-wet																						80.501	80.501	80.501	80.501	80.501	80.501	80.501	80.501	81.4555	83.2457	84.0863	83.6522	12.2653	12.7763	12.3969	13.1723	13.2401	13.319	13.2136	13.3897	11.5935	11.6316	11.6038	11.6833
			Gasification melting furnace	gCH4/t-wet																						0	0	0	0	0	0	0	0	5.48781	5.48813	5.57942	5.63607	6.71198	6.94067	6.87013	6.91096	6.91588	7.04684	7.12147	7.02073	7.04982	6.95295	6.94458	6.94169
			Continuous	gN2O/t-wet																						58.7564	58.7564	58.7564	58.7564	58.7564	58.7564	58.7564	58.7564	58.9138	59.0069	59.1046	59.1688	37.8158	37.8618	37.9118	37.8861	37.8818	37.8507	37.882	37.9435	37.989	38.0152	38.0082	38.0188
			Semi-continuous	gN2O/t-wet																						56.7647	56.7647	56.7647	56.7647	56.7647	56.7647	56.7647	56.7647	57.0109	57.033	57.2928	57.2985	70.1008	71.233	71.4326	71.4534	72.8403	73.1019	73.3428	72.7081	73.1751	73.0635	73.4258	73.0755
			Batch type	gN2O/t-wet																						71.4203	71.4203	71.4203	71.4203	71.4203	71.4203	71.4203	71.4203	72.3094	73.9771	74.76	74.3557	76.154	76.0931	76.1383	76.046	76.0379	76.0285	76.041	76.0201	76.234	76.2295	76.2328	76.2233
			Gasification melting furnace	gN2O/t-wet																						0	0	0	0	0	0	0	0	16.9483	17.0089	16.871	16.7724	13.872	11.9595	12.3345	11.9746	11.3422	11.4649	11.137	11.1924	11.4733	11.8645	11.7069	11.6722
	Industrial waste		Paper/ cardboard or Wood	gCH4/t-wet																						22.0617	22.0617	22.0617	22.0617	22.0617	22.0617	22.0617	22.0617	22.0617	22.0617	22.0617	22.0617	224.5	224.5	224.5	224.5	224.5	224.5	224.5	224.5	224.5	224.5	224.5	224.5
			Waste oil	gCH4/t-wet																						4.80879	4.80879	4.80879	4.80879	4.80879	4.80879	4.80879	4.80879	4.80879	4.80879	4.80879	4.80879	4	4	4	4	4	4	4	4	4	4	4	4
			Waste plastics	gCH4/t-wet																						30.1775	30.1775	30.1775	30.1775	30.1775	30.1775	30.1775	30.1775	30.1775	30.1775	30.1775	30.1775	8	8	8	8	8	8	8	8	8	8	8	8
			Sludge	gCH4/t-wet																						14.2732	14.2732	14.2732	14.2732	14.2732	14.2732	14.2732	14.2732	14.2732	14.2732	14.2732	14.2732	1.5	1.5	1.5	1.5	1.5	1.5	1.5	1.5	1.5	1.5	1.5	1.5
			Textile	gCH4/t-wet																						22.0617	22.0617	22.0617	22.0617	22.0617	22.0617	22.0617	22.0617	22.0617	22.0617	22.0617	22.0617	224.5	224.5	224.5	224.5	224.5	224.5	224.5	224.5	224.5	224.5	224.5	224.5
			Animal and vegetable residues・animal carcasses	gCH4/t-wet																						22.0617	22.0617	22.0617	22.0617	22.0617	22.0617	22.0617	22.0617	22.0617	22.0617	22.0617	22.0617	224.5	224.5	224.5	224.5	224.5	224.5	224.5	224.5	224.5	224.5	224.5	224.5
			Paper/ cardboard or Wood	gN2O/t-wet																						20.9163	20.9163	20.9163	20.9163	20.9163	20.9163	20.9163	20.9163	20.9163	20.9163	20.9163	20.9163	76.9	76.9	76.9	76.9	76.9	76.9	76.9	76.9	76.9	76.9	76.9	76.9
			Waste oil	gN2O/t-wet																						11.8314	11.8314	11.8314	11.8314	11.8314	11.8314	11.8314	11.8314	11.8314	11.8314	11.8314	11.8314	62.2	62.2	62.2	62.2	62.2	62.2	62.2	62.2	62.2	62.2	62.2	62.2
			Waste plastics	gN2O/t-wet																						179.747	179.747	179.747	179.747	179.747	179.747	179.747	179.747	179.747	179.747	179.747	179.747	14.8	14.8	14.8	14.8	14.8	14.8	14.8	14.8	14.8	14.8	14.8	14.8
			Sludge	gN2O/t-wet																						456.515	456.515	456.515	456.515	456.515	456.515	456.515	456.515	456.515	456.515	456.515	456.515	98.9	98.9	98.9	98.9	98.9	98.9	98.9	98.9	98.9	98.9	98.9	98.9
			Textile	gN2O/t-wet																						20.9163	20.9163	20.9163	20.9163	20.9163	20.9163	20.9163	20.9163	20.9163	20.9163	20.9163	20.9163	76.9	76.9	76.9	76.9	76.9	76.9	76.9	76.9	76.9	76.9	76.9	76.9
			Animal and vegetable residues and animal carcasses	gN2O/t-wet																						20.9163	20.9163	20.9163	20.9163	20.9163	20.9163	20.9163	20.9163	20.9163	20.9163	20.9163	20.9163	76.9	76.9	76.9	76.9	76.9	76.9	76.9	76.9	76.9	76.9	76.9	76.9
			Sewage sludge: High-molecular weight flocculant, Fluidized bed incinerator, Normal temperature combustion	gN2O/t-wet																						1507.68	1507.68	1507.68	1507.68	1507.68	1507.68	1507.68	1507.68	1507.68	1507.68	1507.68	1507.68	1507.68	1507.68	1507.68	1507.68	1507.68	1507.68	1507.68	1507.68	1507.68	1507.68	1507.68	1507.68
			Sewage sludge: High-molecular weight flocculant, Fluidized bed incinerator, High temperature combustion（other furnaces）	gN2O/t-wet																						645.329	645.329	645.329	645.329	645.329	645.329	645.329	645.329	645.329	645.329	645.329	645.329	645.329	645.329	645.329	645.329	645.329	645.329	645.329	645.329	645.329	645.329	645.329	645.329
			Sewage sludge: High-molecular weight flocculant, Multiple hearth and other	gN2O/t-wet																						881.821	881.821	881.821	881.821	881.821	881.821	881.821	881.821	881.821	881.821	881.821	881.821	881.821	881.821	881.821	881.821	881.821	881.821	881.821	881.821	881.821	881.821	881.821	881.821
			Sewage sludge Lime sludge	gN2O/t-wet																						294.015	294.015	294.015	294.015	294.015	294.015	294.015	294.015	294.015	294.015	294.015	294.015	294.015	294.015	294.015	294.015	294.015	294.015	294.015	294.015	294.015	294.015	294.015	294.015
			Sewage sludge: Multiple hearth air injection incineration method fluidized bed incinerator, Two-stage incineration method circulating fluidized bed incinerator and Stoker furnace, High temperature combustion	gN2O/t-wet																						263	263	263	263	263	263	263	263	263	263	263	263	263	263	263	263	263	263	263	263	263	263	263	263
			Sewage sludge: Carbonization furnace for solid fuel production	gN2O/t-wet																						31.2	31.2	31.2	31.2	31.2	31.2	31.2	31.2	31.2	31.2	31.2	31.2	31.2	31.2	31.2	31.2	31.2	31.2	31.2	31.2	31.2	31.2	31.2	31.2
	Source: Table 7-40 CH4 emission factors by type of incineration method (MSW), Table 7-42 N2O emission factors by incineration types (MSW), Table 7-50 CH4 emission factors for industrial waste by type, Table 7-52 N2O emission factors for sewage sludge incineration (wet basis) and Table 7-53 N2O Emission factors for industrial waste by type (wet basis), Ministry of the Environment, Japan, Greenhous…
	Use as raw material or fuel
	classification 1	classification 2	classification 3	unit																						1990	1991	1992	1993	1994	1995	1996	1997	1998	1999	2000	2001	2002	2003	2004	2005	2006	2007	2008	2009	2010	2011	2012	2013
	Municipal waste		Plastics (coke oven）	kg CO2/t-dry																						1466.56	1466.56	1466.56	1466.56	1466.56	1466.56	1466.56	1466.56	1466.56	1466.56	1466.56	1466.56	1466.56	1466.56	1466.56	1466.56	1466.56	1466.56	1466.56	1466.56	1466.56	1466.56	1466.56	1466.56
			Waste tire	kg CO2/t-dry																						1867.31	1839.43	1812.84	1805.19	1795.44	1793.65	1804.87	1832.52	1807.96	1815.58	1798.81	1793.67	1794.25	1778.98	1761.55	1746	1737.98	1730.17	1734.14	1737.53	1759.22	1744.03	1743.35	1743.86
			RDF	kg CO2/t-dry																						1081.1	1081.1	1081.1	1081.1	1081.1	1081.1	1081.1	1081.1	1081.1	1081.1	1081.1	1081.1	1081.1	1081.1	1081.1	1080.3	1080.21	1080.08	1080.12	1079.96	1079.82	1079.44	1079.19	1077.74
			RPF	kg CO2/t-dry																						1635.62	1635.62	1635.62	1635.62	1635.62	1635.62	1635.62	1635.62	1635.62	1635.62	1635.62	1635.62	1635.62	1635.62	1635.62	1635.62	1635.62	1635.62	1635.62	1635.62	1633.92	1633.36	1632.93	1632.73
	Source: Table 7-65 CO2 Emission factors specially defined for this category and Table 7-73 CO2 emission factors for the emissions from the use of refused-derived fuel (RDF)or refuse paper & plastic fuel (RPF), Ministry of the Environment, Japan, Greenhouse Gas Inventory Office of Japan, Center for Global Environmental Research, National Institute for Environmental Studies, Japan (2021) National G…
[truncated: 37 more columns]

## Sheet: P_Parameters
	Parameters
	Percentage of fossil-fuel derived plastics
	classification 1	classification 2	classification 3	Unit																						1990	1991	1992	1993	1994	1995	1996	1997	1998	1999	2000	2001	2002	2003	2004	2005	2006	2007	2008	2009	2010	2011	2012	2013
	Percentage of fossil-fuel derived plastics	Municipal waste	Plastics	%																						1	1	1	1	1	1	1	1	1	1	1	1	1	1	1	0.998977	0.998866	0.998705	0.99875	0.998555	0.998379	0.997887	0.997572	0.995735
			PET bottles	%																						1	1	1	1	1	1	1	1	1	1	1	1	1	1	1	1	1	1	1	1	1	1	1	0.998309
		Industrial waste	Waste plastics	%																						1	1	1	1	1	1	1	1	1	1	1	1	1	1	1	1	1	1	1	1	0.998962	0.998619	0.998356	0.998232
	Percentage of semi-aerobic landfill disposal
	classification 1	classification 2	classification 3	Unit																						1990	1991	1992	1993	1994	1995	1996	1997	1998	1999	2000	2001	2002	2003	2004	2005	2006	2007	2008	2009	2010	2011	2012	2013
	Municipal waste			%																						0.25828	0.278147	0.298015	0.317883	0.33775	0.357618	0.377486	0.397353	0.435528	0.464898	0.456017	0.537642	0.55644	0.546351	0.586908	0.564911	0.581918	0.594901	0.58463	0.635017	0.638832	0.613108	0.668637	0.600933
	Industrial waste			%																						0.097976	0.127099	0.129013	0.152738	0.172253	0.189171	0.252657	0.267154	0.284047	0.293105	0.335567	0.351652	0.442763	0.465834	0.478304	0.517094	0.539512	0.541624	0.541626	0.630999	0.530416	0.633413	0.714576	0.699542
	Waste Incineration Facility Composition
	classification 1	classification 2	classification 3	Unit																						1990	1991	1992	1993	1994	1995	1996	1997	1998	1999	2000	2001	2002	2003	2004	2005	2006	2007	2008	2009	2010	2011	2012	2013
	Continuous incineration facility			%																						0.714928	0.722407	0.729886	0.737365	0.744844	0.752323	0.759801	0.76728	0.771492	0.779519	0.784175	0.78607	0.815827	0.831652	0.838495	0.851823	0.857245	0.86101	0.862658	0.868692	0.872173	0.874857	0.880099	0.881512
	Semi-continuous incineration facility			%																						0.131169	0.132558	0.133947	0.135336	0.136725	0.138114	0.139503	0.140892	0.14329	0.141894	0.140854	0.144065	0.128605	0.122082	0.115592	0.106906	0.103328	0.100757	0.0978823	0.0963677	0.0937667	0.0919754	0.0873596	0.0882123
	Batch type incineration facility			%																						0.153904	0.145036	0.136168	0.1273	0.118431	0.109563	0.100695	0.0918275	0.085218	0.0785866	0.0749717	0.069865	0.0555687	0.0462658	0.0459131	0.0412705	0.0394268	0.0382337	0.0394595	0.0349406	0.0340599	0.0331675	0.0325412	0.0302752
[truncated: 37 more columns]
