# Supplementary material for: Japan’s greenhouse gas reduction scenarios toward net zero by 2050 in the material cycles and waste management sector
Source: Springer Nature journal article supplement (doi:10.1007/s10163-023-01650-7), 2023-04-25
Supplement: MOESM7 [file 25283090]

## Sheet: P_parameter
			Parameter
			Population and municipal waste generation intensity
				Unit																						1990	1991	1992	1993	1994	1995	1996	1997	1998	1999	2000	2001	2002	2003	2004	2005	2006	2007	2008	2009	2010	2011	2012	2013
			Population	Thousands																						123611	124101	124567	124938	125265	125570	125859	126157	126472	126667	126926	127316	127486	127694	127787	127768	127901	128033	128084	128032	128057	127834	127593	127414
			Municipal waste generation intensity	g/person-day (wet)																						1113.88	1128.82	1116.52	1124.22	1132.92	1139.44	1147.29	1153.12	1161.23	1161.45	1180.37	1176.71	1164.76	1164.38	1141.24	1130.47	1114.39	1087.39	1026.2	989.735	970.437	973.651	968.628	964.905
[truncated: 37 more columns]

## Sheet: EF_Energy-derived,MW
			Emission factors
			1990～2017
			Fuel types	Unit																						1990	1991	1992	1993	1994	1995	1996	1997	1998	1999	2000	2001	2002	2003	2004	2005	2006	2007	2008	2009	2010	2011	2012	2013
			Low sulfur fuel oil A	kgCO2/GJ																						69.3	69.3	69.3	69.3	69.3	69.3	69.3	69.3	69.3	69.3	69.3	69.3	69.3	69.3	69.3	69.3	69.3	69.3	69.3	69.3	69.3	69.3	69.3	70.8511
			Fuel oil A	kgCO2/GJ																						69.3	69.3	69.3	69.3	69.3	69.3	69.3	69.3	69.3	69.3	69.3	69.3	69.3	69.3	69.3	69.3	69.3	69.3	69.3	69.3	69.3	69.3	69.3	70.8511
			Kerosene	kgCO2/GJ																						67.87	67.87	67.87	67.87	67.87	67.87	67.87	67.87	67.87	67.87	67.87	67.87	67.87	67.87	67.87	67.87	67.87	67.87	67.87	67.87	67.87	67.87	67.87	68.5893
			Diesel oil	kgCO2/GJ																						68.6767	68.6767	68.6767	68.6767	68.6767	68.6767	68.6767	68.6767	68.6767	68.6767	68.6767	68.6767	68.6767	68.6767	68.6767	68.6767	68.6767	68.6767	68.6767	68.6767	68.6767	68.6767	68.6767	68.9129
			Gasoline	kgCO2/GJ																						67.0633	67.0633	67.0633	67.0633	67.0633	67.0633	67.0633	67.0633	67.0633	67.0633	67.0633	67.0633	67.0633	67.0633	67.0633	67.0633	67.0633	67.0633	67.0633	67.0633	67.0633	67.0633	67.0633	68.6162
			City gas	kgCO2/GJ																						51.3701	51.3701	51.3701	51.3701	51.3701	51.3701	51.3701	51.3701	51.3701	51.3701	51.3701	51.3701	51.3701	51.3701	51.3701	51.3701	51.3701	51.3701	51.3714	51.3854	51.397	51.4175	51.4357	51.4696
			Propane	kgCO2/GJ																						51.3701	51.3701	51.3701	51.3701	51.3701	51.3701	51.3701	51.3701	51.3701	51.3701	51.3701	51.3701	51.3701	51.3701	51.3701	51.3701	51.3701	51.3701	51.3714	51.3854	51.397	51.4175	51.4357	51.4696
			Coke	kgCO2/GJ																						107.727	107.727	107.727	107.727	107.727	107.727	107.727	107.727	107.727	107.727	107.727	107.727	107.727	107.727	107.727	107.727	107.727	107.727	107.727	107.727	107.727	107.727	107.727	110.795
			FY 2018 and beyond
			Fuel types	Unit																						1990	1991	1992	1993	1994	1995	1996	1997	1998	1999	2000	2001	2002	2003	2004	2005	2006	2007	2008	2009	2010	2011	2012	2013
			Kerosene	kgCO2/GJ
			Gasoline	kgCO2/GJ
			Diesel oil	kgCO2/GJ
			Fuel oil A	kgCO2/GJ
			Fuel oil B or fuel oil C	kgCO2/GJ
			Propane	kgCO2/GJ
			LNG	kgCO2/GJ
			City gas	kgCO2/GJ
			Coke	kgCO2/GJ
[truncated: 37 more columns]

## Sheet: EF_Energy-derived,IW
			Emission factors
			Collection and transportation
			Fuel types	Unit																						1990	1991	1992	1993	1994	1995	1996	1997	1998	1999	2000	2001	2002	2003	2004	2005	2006	2007	2008	2009	2010	2011	2012	2013
			Gasoline	kgCO2/L																						2.3188	2.3188	2.3188	2.3188	2.3188	2.3188	2.3188	2.3188	2.3188	2.3188	2.3188	2.3188	2.3188	2.3188	2.3188	2.3188	2.3188	2.3188	2.31839	2.31856	2.31847	2.31835	2.31786	2.28949
			Diesel oil	kgCO2/L																						2.60683	2.60683	2.60683	2.60683	2.60683	2.60683	2.60683	2.60683	2.60683	2.60683	2.60683	2.60683	2.60683	2.60683	2.60683	2.60683	2.60683	2.60683	2.60592	2.60407	2.61408	2.60669	2.60548	2.62157
			LPG	kgCO2/L																						3.06541	3.06543	3.06545	3.06548	3.06548	3.06552	3.06552	3.06555	3.06558	3.06559	3.0656	3.06563	3.06562	3.06565	3.06563	3.06565	3.06564	3.06563	3.06563	3.06562	3.06568	3.06567	3.06568	3.00655
			Natural gas	kgCO2/m3																						2.14539	2.15207	2.15302	2.15697	2.15142	2.16034	2.16938	2.17888	2.1793	2.17277	2.16882	2.18621	2.16792	2.18705	2.16037	2.18501	2.22061	2.27375	2.27859	2.28515	2.27669	2.28042	2.28096	2.02932
			Fuel oil A	kgCO2/L																						2.77541	2.77541	2.77541	2.77541	2.77541	2.77541	2.77541	2.77541	2.77541	2.77541	2.77541	2.77541	2.77541	2.77541	2.77541	2.77541	2.77541	2.77541	2.76334	2.76701	2.76642	2.75646	2.75502	2.75625
			Diesel oil mixed with 5% or less of BDF	kgCO2/L																						2.47649	2.47649	2.47649	2.47649	2.47649	2.47649	2.47649	2.47649	2.47649	2.47649	2.47649	2.47649	2.47649	2.47649	2.47649	2.47649	2.47649	2.47649	2.47563	2.47387	2.48338	2.47636	2.4752	2.49049
			BDF-B100	kgCO2/L																						0	0	0	0	0	0	0	0	0	0	0	0	0	0	0	0	0	0	0	0	0	0	0	0
			Treatment plant and Yard truck
			Fuel types	Unit																						1990	1991	1992	1993	1994	1995	1996	1997	1998	1999	2000	2001	2002	2003	2004	2005	2006	2007	2008	2009	2010	2011	2012	2013
			City gas	kgCO2/m3																						2.30138	2.30138	2.30138	2.30138	2.30138	2.30138	2.30138	2.30138	2.30138	2.30138	2.30138	2.30138	2.30138	2.30138	2.30138	2.30138	2.30138	2.30138	2.30144	2.30207	2.30258	2.3035	2.30432	2.09787
			Natural gas	kgCO2/m3																						2.14539	2.15207	2.15302	2.15697	2.15142	2.16034	2.16938	2.17888	2.1793	2.17277	2.16882	2.18621	2.16792	2.18705	2.16037	2.18501	2.22061	2.27375	2.27859	2.28515	2.27669	2.28042	2.28096	2.02932
			Diesel oil	kgCO2/L																						2.60683	2.60683	2.60683	2.60683	2.60683	2.60683	2.60683	2.60683	2.60683	2.60683	2.60683	2.60683	2.60683	2.60683	2.60683	2.60683	2.60683	2.60683	2.60592	2.60407	2.61408	2.60669	2.60548	2.62157
			Kerosene	kgCO2/L																						2.49321	2.49321	2.49321	2.49321	2.49321	2.49321	2.49321	2.49321	2.49321	2.49321	2.49321	2.49321	2.49321	2.49321	2.49321	2.49321	2.49321	2.49321	2.49258	2.49251	2.49295	2.49309	2.49321	2.50313
			Fuel oil A	kgCO2/L																						2.77541	2.77541	2.77541	2.77541	2.77541	2.77541	2.77541	2.77541	2.77541	2.77541	2.77541	2.77541	2.77541	2.77541	2.77541	2.77541	2.77541	2.77541	2.76334	2.76701	2.76642	2.75646	2.75502	2.75625
			Fuel oil C	kgCO2/L																						2.88168	2.89063	2.88138	2.88892	2.89024	2.88694	2.89129	2.89585	2.8899	2.8907	2.8906	2.89462	2.88991	2.89557	2.89276	2.89025	2.89393	2.88339	2.88736	2.89748	2.89304	2.86526	2.91151	3.0478
			LPG	kgCO2/kg																						3.06541	3.06543	3.06545	3.06548	3.06548	3.06552	3.06552	3.06555	3.06558	3.06559	3.0656	3.06563	3.06562	3.06565	3.06563	3.06565	3.06564	3.06563	3.06563	3.06562	3.06568	3.06567	3.06568	3.00655
			Coal	kgCO2/kg																						2.23881	2.23881	2.23881	2.23881	2.23881	2.23881	2.23881	2.23881	2.23881	2.23881	2.23881	2.23881	2.23881	2.23881	2.23881	2.23881	2.23881	2.23881	2.23881	2.23881	2.23881	2.23881	2.23881	2.18629
			Waste oil and reclaimed oil	kgCO2/kg																						0	0	0	0	0	0	0	0	0	0	0	0	0	0	0	0	0	0	0	0	0	0	0	0
			Wood	kgCO2/kg																						0	0	0	0	0	0	0	0	0	0	0	0	0	0	0	0	0	0	0	0	0	0	0	0
			BDF	kgCO2/L																						0	0	0	0	0	0	0	0	0	0	0	0	0	0	0	0	0	0	0	0	0	0	0	0
			RPF	kgCO2/kg																						0	0	0	0	0	0	0	0	0	0	0	0	0	0	0	0	0	0	0	0	0	0	0	0
			Gasoline	kgCO2/L																						2.3188	2.3188	2.3188	2.3188	2.3188	2.3188	2.3188	2.3188	2.3188	2.3188	2.3188	2.3188	2.3188	2.3188	2.3188	2.3188	2.3188	2.3188	2.31839	2.31856	2.31847	2.31835	2.31786	2.28949
			Fuel oil B	kgCO2/L																						2.77541	2.77541	2.77541	2.77541	2.77541	2.77541	2.77541	2.77541	2.77541	2.77541	2.77541	2.77541	2.77541	2.77541	2.77541	2.77541	2.77541	2.77541	2.76334	2.76701	2.76642	2.75646	2.75502	2.75625
			RDF	kgCO2/kg																						0	0	0	0	0	0	0	0	0	0	0	0	0	0	0	0	0	0	0	0	0	0	0	0
			Coke	kgCO2/kg																						3.16716	3.16716	3.16716	3.16716	3.16716	3.16716	3.16716	3.16716	3.16716	3.16716	3.16716	3.16716	3.16716	3.16716	3.16716	3.16716	3.16716	3.16716	3.16716	3.16716	3.16716	3.16716	3.16716	3.23306
			Coke oven gas	kgCO2/m3																						0.866683	0.86825	0.871447	0.871174	0.868652	0.869236	0.869176	0.864273	0.862365	0.860469	0.857282	0.859227	0.852441	0.860674	0.860605	0.863295	0.861655	0.857488	0.854202	0.852117	0.85916	0.850888	0.836035	0.756165
			Crude oil	kgCO2/L																						2.68379	2.67276	2.67093	2.67231	2.67165	2.67209	2.67353	2.67545	2.6732	2.67546	2.66913	2.66729	2.66717	2.66718	2.66093	2.66217	2.66311	2.66352	2.6668	2.66251	2.66583	2.66705	2.66401	2.66023
[truncated: 37 more columns]

## Sheet: EF_Electricity
			Emission factors
				Unit																						1990	1991	1992	1993	1994	1995	1996	1997	1998	1999	2000	2001	2002	2003	2004	2005	2006	2007	2008	2009	2010	2011	2012	2013
			GHG emission factors for electricity (including T&D losses)	kgCO2/kWh																						0.46013	0.450227	0.454884	0.429269	0.449522	0.428133	0.42326	0.41135	0.393605	0.406766	0.39994	0.399688	0.421563	0.444848	0.426723	0.427345	0.414556	0.448365	0.445583	0.428386	0.438774	0.51853	0.569154	0.577842
[truncated: 37 more columns]

## Sheet: W_Waste oil
	W_Waste oil
	Generation																																						↓産廃統計見直しのため除外
		Unit																								1990	1991	1992	1993	1994	1995	1996	1997	1998	1999	2000	2001	2002	2003	2004	2005	2006	2007	2008	2009	2010	2011	2012	2013
	Waste oil total	kt (wet)																								3470.86	3322	3591.48	2749.33	3062.47	3173	3079.7	3245.39	2827.59	2947.76	3247.83	3088.78	3185	3247.72	3310.45	3470.66	3406.14	3610.24	3616.71	3047.64	3251.02	3118	3212	2912
	Chemical industry	kt (wet)																															698.857	667.83	855.867	899.85	867.275	892.414	885.266	878.118	925.717	979.485	1061.04	997.962	884.42	898.537	921	849	806
	Manufacture of iron and steel	kt (wet)																															194.745	205.081	175.273	188.786	195.381	190.717	245.488	300.258	342.084	358.806	336.206	360.522	170.428	272.991	230	249	363
	Construction																																											137	124	148	101	98	133
	Manufacture of food	kt (wet)																																							155	106	120	83	85	82	90	82	72
	Manufacture of petroleum and coal products																																								129	110	122	132	90	107	122	140	103
	Manufacture of plastic products	kt (wet)																																							65	70	53	47	48	48	49	46	47
	Manufacture of non-ferrous metals and products	kt (wet)																																							92	61	76	62	42	50	48	56	34
	Manufacture of fabricated metal products	kt (wet)																																							112	121	127	131	126	147	149	142	154
	Manufacture of general-purpose machinery	kt (wet)																																										93	69	83	84	80	117
	Manufacture of production machinery	kt (wet)																																										136	82	74	70	77	59
	Electronic parts, devices and electronic circuits	kt (wet)																																									83	67	85	78	67	74	61
	Miscellaneous manufacturing industry	kt (wet)																																							5	38	45	17	27	28	43	32	31
	Manufacture of transportation equipment	kt (wet)																															262.986	255.725	238.881	282.333	273.198	369.126	314.178	259.229	270.925	262.624	302.861	384.189	350.351	331.16	350	232	250
	Printing and allied industries	kt (wet)																																								61	67	84	70	48	50	311	38
	Motor vehicles	kt (wet)																																								167	211	192	150	157	133	90	65
	Atomobile maintenance services	kt (wet)																																								95	108	122	64	115	69	85	97
	Other than the 6 industries with highest generations	kt (wet)																																										571.036	580.438	583.333	542	569	482
[truncated: 37 more columns]

## Sheet: W_Waste plastics
	W_Waste plastics
	Generation
		Unit																								1990	1991	1992	1993	1994	1995	1996	1997	1998	1999	2000	2001	2002	2003	2004	2005	2006	2007	2008	2009	2010	2011	2012	2013
	Waste plastics total	kt (wet)																								4337.86	4570	4690.92	5348.39	5770.87	6253	6571	7567.38	5847.77	5745.37	5790.14	5473.18	5551.52	5462.37	5939.04	6051.82	6093.93	6428.02	6445.34	5665.02	6185.46	5710	5691	6120
	Construction	kt (wet)																															1047.88	1049.87	1046.46	902.586	856.424	856.453	842.431	996.165	1011.01	980.738	1098.38	900.84	892.209	1019.44	1013	993	1212
	Manufacture of pulp, paper and paper products	kt (wet)																															392.52	440.489	379.584	358.148	367.895	327.92	509.47	440.108	477.832	441.6	456.021	562.732	435.298	429.05	400	393	382
	Chemical industry	kt (wet)																															302.519	291.69	306.892	317.958	319.292	314.269	276.992	350.494	388.65	361	352.884	330.781	273.323	270.356	271	294	416
	Manufacture of plastic products	kt (wet)																															901.886	570.408	609.578	601.2	582.012	619.353	644.863	742.226	732.399	771.947	739.256	689.399	641.397	713.721	711	631	693
	Manufacture of food	kt (wet)																																														264	259
	Manufacture of textile product	kt (wet)																																														88	86
	Manufacture of rubber products	kt (wet)																																														152	181
	Manufacture of fabricated metal products	kt (wet)																																														89	87
	Manufacture of transportation equipment	kt (wet)																																														168	148
	Miscellaneous manufacturing industry	kt (wet)																																														97	125
	Road freight transport	kt (wet)																																														99	115
	Motor vehicles	kt (wet)																																														101	108
	Miscellaneous wholesale trade and retail trade	kt (wet)																																														280	246
	Medical, health care and welfare	kt (wet)																																														298	235
	Atomobile maintenance services	kt (wet)																																														221	213
	Other than the 15 industries with highest generations	kt (wet)																																														1523	1614
[truncated: 37 more columns]

## Sheet: W_Wood
	W_Wood
	Generation
		Unit																								1990	1991	1992	1993	1994	1995	1996	1997	1998	1999	2000	2001	2002	2003	2004	2005	2006	2007	2008	2009	2010	2011	2012	2013
	Wood total	kt (wet)																								6573.27	6810	7302.96	6948.01	7881.15	7161	7428.5	6754.16	5963.99	5525.33	5511.36	5356.56	4962.73	5915.15	5959.45	5951.21	5851.05	5971.06	6056.89	5981.18	5659.66	5765	5810	6445
	Construction	kt (wet)																															3025.5	3188.34	2964.09	3184.83	3063.44	3231.23	3766.34	3995.25	4143.6	4165.95	4293.57	4782.99	4927.36	4798.46	4952	4896	5460
	Manufacture of lumber and wood products, except furniture	kt (wet)																															3251.52	1894.64	1754.99	1546.84	1518.22	1337.76	1737.12	1563.35	1452.32	1363.13	1310.78	980.287	799.321	590.55	542	531	720
	Manufacture of furniture and fixtures	kt (wet)																															235.906	259.427	232.284	214.644	207.213	175.21	187.313	177.126	166.408	144.777	184.659	144.431	122.905	119.507	122	247	127
	Manufacture of pulp, paper and paper products	kt (wet)																															241.241	621.577	573.969	565.041	567.682	218.529	224.37	223.728	188.883	177.194	182.057	149.181	131.592	151.147	149	136	138
[truncated: 37 more columns]

## Sheet: W_Animal and vegetable residues
	W_Animal and vegetable residues
	Generation
		Unit																								1990	1991	1992	1993	1994	1995	1996	1997	1998	1999	2000	2001	2002	2003	2004	2005	2006	2007	2008	2009	2010	2011	2012	2013
	Animal and vegetable residues total	kt (wet)																								3543	2994	3316.31	3218.64	4376	3961	3447	3132.04	3967.64	4002.91	4052.3	4110.36	4680.26	3492.32	3512.04	3116.77	3008.36	3066	3193.74	2888.16	2901.64	2754	2572	2603
	Manufacture of food	kt (wet)																															2357.89	1950.92	1986.71	1928.56	1950.97	2335.69	2180.95	2166.4	2145.45	2075.72	2039.91	2164.04	1955.13	2030.04	1919	1781	1810
	manufacture of beverages,tobacco and feed	kt (wet)																															730.455	1976.2	1970.07	2078.86	2110.47	2288.65	1196.56	1227.13	896.689	853.787	930.202	922.08	892.838	828.335	791	741	726
	Chemical industry	kt (wet)																															43.71	40.515	46.138	44.883	48.913	49.989	77.268	79.403	74.633	78.854	96.197	107.618	40.1892	43.2642	44	49	66
[truncated: 37 more columns]

## Sheet: W_paper and cardboard
	W_Paper/ cardboard
	Generation
		Unit																								1990	1991	1992	1993	1994	1995	1996	1997	1998	1999	2000	2001	2002	2003	2004	2005	2006	2007	2008	2009	2010	2011	2012	2013
	Paper/ cardboard total	kt (wet)																								1193.21	1143	1401.39	1683.09	1816.73	1897	2074.21	2063.18	2380.17	2237.32	2156.43	2158.8	2095.96	1923.4	1755.58	1748.38	1664.37	1466	1382.64	1265.11	1153.03	1118	1020	896
	Construction	kt (wet)																																312.705	296.926	280.497	269.314	241.857	314.216	351.714	390.517	378.656	345.511	367.06	281.968	295.49	311	270	268
	Manufacture of pulp, paper and paper products	kt (wet)																															1429.68	1315.3	1168.51	1120.5	1111.87	1065.11	850.06	781.878	723.438	701.038	580.337	626.798	675.532	605.287	561	520	393
	Printing and allied industries	kt (wet)																															633.498	752.172	771.889	755.429	777.617	748.165	718.679	589.231	614.675	556.887	526.958	363.214	281.139	230.006	225	210	229
	Publishers	kt (wet)																																				40.83	40.442	32.755	19.731	27.793	13.486	25.5656	26.4707	22.2441	22	21	5
	Other	kt (wet)																															0	0	0	-0.001	0	0	-0.001	-0.001	0.02	0	-0.292	0	0.000157513	0	-1	-1	1
[truncated: 37 more columns]

## Sheet: W_Textile
	W_Textile
	Generation
		Unit																								1990	1991	1992	1993	1994	1995	1996	1997	1998	1999	2000	2001	2002	2003	2004	2005	2006	2007	2008	2009	2010	2011	2012	2013
	Textile total	kt (wet)																								99.081	101	96.454	113.917	78.37	84	79.926	68.367	87.653	82.901	75.847	77.853	69.963	72.275	74.879	92.791	79.675	75	74.3573	69.2948	79.4331	79	68	89
	Construction	kt (wet)																																33.52	38.34	35.745	39.314	34.62	40.932	44.398	48.076	50.787	47.864	45.0793	48.5503	58.8986	57	50	70
	Manufacture of textile products	kt (wet)																															68.367	54.133	44.561	40.102	38.539	35.343	31.343	30.481	44.715	28.888	26.707	29.278	20.7445	20.5346	22	19	19
[truncated: 37 more columns]

[truncated: 1 more sheets: W_Manufacturing Sludge]
