# Supplementary material for: Japan’s greenhouse gas reduction scenarios toward net zero by 2050 in the material cycles and waste management sector
Source: Springer Nature journal article supplement (doi:10.1007/s10163-023-01650-7), 2023-04-25
Supplement: MOESM9 [file 25283090]

## Sheet: AD_IW_BAU
	Collection and transportation
		単位																								1990	1991	1992	1993	1994	1995	1996	1997	1998	1999	2000	2001	2002	2003	2004	2005	2006	2007	2008	2009	2010	2011	2012	2013
	Gasoline	kl																								11501	10500	12455.1	12185	17380.4	19646.5	20051.8	19973.9	19879.5	18124.4	16788.7	15826.2	14668.4	13628.7	13024.7	12702.9	12013.6	11958.7	11772.2	11427.5	11504.6	11496.4	11427.5	11480.2
	Diesel oil	kl																								626902	572342	678911	664189	947385	1.0709e+06	1.09299e+06	1.08875e+06	1.08361e+06	987934	915131	862667	799557	742883	709961	692416	654844	651855	648842	641469	649130	666093	698412	713932
	LPG	kl																								1400.08	1278.23	1516.24	1483.36	2115.83	2391.68	2441.02	2431.54	2420.06	2206.39	2043.8	1926.63	1785.68	1659.11	1585.58	1546.4	1462.49	1455.81	1455.81	1455.81	1463.92	1463.92	1463.92	1463.92
	Natural gas	千m3																								1045.19	954.224	1131.9	1107.35	1579.5	1785.44	1822.27	1815.19	1806.62	1647.11	1525.73	1438.26	1333.04	1238.55	1183.67	1154.41	1091.77	1086.79	1086.79	1086.79	1086.79	1086.79	1086.79	1086.79
	Fuel oil A	kl																								1306.48	1192.78	1414.87	1384.19	1974.38	2231.79	2277.84	2268.99	2258.27	2058.89	1907.16	1797.83	1666.3	1548.19	1479.58	1443.02	1364.72	1358.49	1411.2	1459.87	1480.14	1467.98	1455.81	1447.7
	Diesel oil mixed with 5% or less of BDF	kl																								308.096	281.282	333.657	326.421	465.6	526.304	537.161	535.075	532.548	485.529	449.749	423.965	392.949	365.096	348.917	340.294	321.829	320.36	320.36	320.36	320.36	320.36	320.36	320.36
	BDF-B100	kl																								2090.37	1908.45	2263.8	2214.71	3159.01	3570.87	3644.54	3630.38	3613.24	3294.22	3051.46	2876.52	2666.08	2477.11	2367.33	2308.83	2183.55	2173.58	2258.74	2266.85	2088.42	2206.02	2157.36	1772.12
	Treatment plant and yard truck
		単位																								1990	1991	1992	1993	1994	1995	1996	1997	1998	1999	2000	2001	2002	2003	2004	2005	2006	2007	2008	2009	2010	2011	2012	2013
	Electricity	MWh																								2.13739e+06	1.95137e+06	2.31471e+06	2.26452e+06	3.23006e+06	3.65118e+06	3.7265e+06	3.71203e+06	3.6945e+06	3.36831e+06	3.12009e+06	2.94122e+06	2.72605e+06	2.53282e+06	2.42058e+06	2.36076e+06	2.23266e+06	2.22246e+06	2.23651e+06	2.22248e+06	2.32893e+06	2.22289e+06	2.29454e+06	2.32183e+06
	City gas	千m3																								59556	54372.8	64496.9	63098.3	90002	101736	103835	103432	102943	93854.2	86937.9	81953.7	75958.3	70574.2	67446.7	65779.9	62210.5	61926.5	63546.7	66897.9	66377.5	66661.7	68787.6	69230.4
	Natural gas	千m3																								5231.87	4776.54	5665.92	5543.05	7906.49	8937.31	9121.68	9086.26	9043.35	8244.9	7637.31	7199.46	6672.77	6199.8	5925.05	5778.63	5465.06	5440.11	4842.22	4698.28	5960.51	6122.9	5576.67	5672.63
	Diesel oil	kl																								147014	134219	159211	155758	222170	251136	256317	255321	254116	231679	214606	202303	187503	174213	166492	162378	153567	152866	150570	151629	154704	160026	161129	165097
	Kerosene	kl																								82027.4	74888.6	88832.7	86906.3	123961	140123	143014	142458	141785	129267	119741	112876	104619	97203.1	92895.5	90599.7	85683.6	85292.4	80789.8	79210.1	76837	84155.7	91991.1	88809.7
	Fuel oil A	kl																								141711	129378	153468	150140	214156	242077	247071	246112	244950	223323	206865	195006	180740	167929	160487	156521	148028	147352	125433	103322	106883	112460	103742	98811.5
	Fuel oil C	kl																								15124.1	13807.9	16378.9	16023.7	22855.9	25835.7	26368.7	26266.3	26142.3	23834.1	22077.7	20812	19289.5	17922.2	17128	16704.7	15798.3	15726.1	16172.7	14718.6	11330.5	13297.6	12736.7	12319.6
	LPG	t																								11979.3	10936.8	12973.2	12691.9	18103.4	20463.6	20885.8	20804.7	20706.4	18878.2	17487.1	16484.5	15278.6	14195.6	13566.5	13231.2	12513.3	12456.2	12349.1	12208.9	12234.7	12308.5	12275.3	12238.4
	Coal	t																								27415.8	25029.8	29690.3	29046.5	41431.3	46832.9	47799.1	47613.5	47388.6	43204.6	40020.8	37726.4	34966.4	32487.9	31048.2	30280.9	28637.8	28507.1	27942.4	29311.7	27757.9	28470.2	27499.5	28329.9
	Waste oil and reclaimed oil	t																								233535	213210	252910	247425	352922	398935	407165	405584	403668	368028	340907	321363	297853	276741	264477	257941	243944	242831	252176	256748	24904.9	257402	263812	264185
	Wood	t																								114675	104695	124189	121496	173299	195893	199934	199158	198217	180717	167399	157802	146258	135891	129869	126659	119787	119240	118889	117147	116811	11788.1	119369	119882
	BDF	kl																								1022.24	933.272	1107.04	1083.04	1544.82	1746.23	1782.26	1775.33	1766.95	1610.94	1492.23	1406.68	1303.77	1211.36	1157.68	1129.07	1067.8	1062.93	1199.48	1210.55	1162.58	1136.74	1181.03	1893.34
	RPF	t																								21463.4	19595.5	23244.1	22740.1	32435.9	36664.8	37421.2	37275.9	37099.8	33824.2	31331.6	29535.4	27374.7	25434.3	24307.2	23706.5	22420.1	22317.8	24757.3	28492.3	28894.6	32105.5	31315.7	33308.7
	Gasoline	kl																								18900.7	17255.8	20468.8	20024.9	28563.1	32287.1	32953.2	32825.2	32670.2	29785.7	27590.7	26008.9	24106.2	22397.5	21404.9	20876	19743.2	19653.1	19295.1	19284	19224.9	19077.3	19236	19047.8
	Fuel oil B	kl																								663.744	605.978	718.81	703.223	1003.06	1133.84	1157.23	1152.73	1147.29	1045.99	968.913	913.365	846.546	786.541	751.685	733.109	693.329	690.164	771.36	763.978	782.432	793.504	771.36	775.05
	RDF	t																								351.394	320.812	380.547	372.295	531.033	600.267	612.65	610.271	607.389	553.762	512.954	483.546	448.171	416.404	397.951	388.117	367.057	365.381	365.381	365.381	365.381	365.381	365.381	365.381
	Coke	t																								41581.6	37962.8	45031.4	44054.9	62838.9	71031.6	72497	72215.4	71874.4	65528.5	60699.5	57219.6	53033.6	49274.5	47090.9	45927.1	43435	43236.7	57881.5	29507.3	22266.1	23639	21328.6	20501.9
	Coke oven gas	千m3																								177.472	162.026	192.195	188.028	268.198	303.165	309.419	308.218	306.762	279.678	259.068	244.215	226.349	210.305	200.985	196.018	185.382	184.536	184.536	184.536	184.536	184.536	184.536	184.536
	Crude oil	kl																								883.809	806.891	957.132	936.377	1335.63	1509.76	1540.91	1534.92	1527.68	1392.79	1290.16	1216.19	1127.22	1047.32	1000.91	976.172	923.203	918.988	5019.37	6488.28	1682.97	3199.85	3229.38	3657.5
[truncated: 37 more columns]

## Sheet: AD_IW_planning&Exp planning
	Collection and transportation
		単位																								1990	1991	1992	1993	1994	1995	1996	1997	1998	1999	2000	2001	2002	2003	2004	2005	2006	2007	2008	2009	2010	2011	2012	2013
	Gasoline	kl																								11501	10500	12455.1	12185	17380.4	19646.5	20051.8	19973.9	19879.5	18124.4	16788.7	15826.2	14668.4	13628.7	13024.7	12702.9	12013.6	11958.7	11772.2	11427.5	11504.6	11496.4	11427.5	11480.2
	Diesel oil	kl																								626902	572342	678911	664189	947385	1.0709e+06	1.09299e+06	1.08875e+06	1.08361e+06	987934	915131	862667	799557	742883	709961	692416	654844	651855	648842	641469	649130	666093	698412	713932
	LPG	kl																								1400.08	1278.23	1516.24	1483.36	2115.83	2391.68	2441.02	2431.54	2420.06	2206.39	2043.8	1926.63	1785.68	1659.11	1585.58	1546.4	1462.49	1455.81	1455.81	1455.81	1463.92	1463.92	1463.92	1463.92
	Natural gas	千m3																								1045.19	954.224	1131.9	1107.35	1579.5	1785.44	1822.27	1815.19	1806.62	1647.11	1525.73	1438.26	1333.04	1238.55	1183.67	1154.41	1091.77	1086.79	1086.79	1086.79	1086.79	1086.79	1086.79	1086.79
	Fuel oil A	kl																								1306.48	1192.78	1414.87	1384.19	1974.38	2231.79	2277.84	2268.99	2258.27	2058.89	1907.16	1797.83	1666.3	1548.19	1479.58	1443.02	1364.72	1358.49	1411.2	1459.87	1480.14	1467.98	1455.81	1447.7
	Diesel oil mixed with 5% or less of BDF	kl																								308.096	281.282	333.657	326.421	465.6	526.304	537.161	535.075	532.548	485.529	449.749	423.965	392.949	365.096	348.917	340.294	321.829	320.36	320.36	320.36	320.36	320.36	320.36	320.36
	BDF-B100	kl																								2090.37	1908.45	2263.8	2214.71	3159.01	3570.87	3644.54	3630.38	3613.24	3294.22	3051.46	2876.52	2666.08	2477.11	2367.33	2308.83	2183.55	2173.58	2258.74	2266.85	2088.42	2206.02	2157.36	1772.12
	Treatment plant and yard truck
		単位																								1990	1991	1992	1993	1994	1995	1996	1997	1998	1999	2000	2001	2002	2003	2004	2005	2006	2007	2008	2009	2010	2011	2012	2013
	Electricity	MWh																								2.13739e+06	1.95137e+06	2.31471e+06	2.26452e+06	3.23006e+06	3.65118e+06	3.7265e+06	3.71203e+06	3.6945e+06	3.36831e+06	3.12009e+06	2.94122e+06	2.72605e+06	2.53282e+06	2.42058e+06	2.36076e+06	2.23266e+06	2.22246e+06	2.23651e+06	2.22248e+06	2.32893e+06	2.22289e+06	2.29454e+06	2.32183e+06
	City gas	千m3																								59556	54372.8	64496.9	63098.3	90002	101736	103835	103432	102943	93854.2	86937.9	81953.7	75958.3	70574.2	67446.7	65779.9	62210.5	61926.5	63546.7	66897.9	66377.5	66661.7	68787.6	69230.4
	Natural gas	千m3																								5231.87	4776.54	5665.92	5543.05	7906.49	8937.31	9121.68	9086.26	9043.35	8244.9	7637.31	7199.46	6672.77	6199.8	5925.05	5778.63	5465.06	5440.11	4842.22	4698.28	5960.51	6122.9	5576.67	5672.63
	Diesel oil	kl																								147014	134219	159211	155758	222170	251136	256317	255321	254116	231679	214606	202303	187503	174213	166492	162378	153567	152866	150570	151629	154704	160026	161129	165097
	Kerosene	kl																								82027.4	74888.6	88832.7	86906.3	123961	140123	143014	142458	141785	129267	119741	112876	104619	97203.1	92895.5	90599.7	85683.6	85292.4	80789.8	79210.1	76837	84155.7	91991.1	88809.7
	Fuel oil A	kl																								141711	129378	153468	150140	214156	242077	247071	246112	244950	223323	206865	195006	180740	167929	160487	156521	148028	147352	125433	103322	106883	112460	103742	98811.5
	Fuel oil C	kl																								15124.1	13807.9	16378.9	16023.7	22855.9	25835.7	26368.7	26266.3	26142.3	23834.1	22077.7	20812	19289.5	17922.2	17128	16704.7	15798.3	15726.1	16172.7	14718.6	11330.5	13297.6	12736.7	12319.6
	LPG	t																								11979.3	10936.8	12973.2	12691.9	18103.4	20463.6	20885.8	20804.7	20706.4	18878.2	17487.1	16484.5	15278.6	14195.6	13566.5	13231.2	12513.3	12456.2	12349.1	12208.9	12234.7	12308.5	12275.3	12238.4
	Coal	t																								27415.8	25029.8	29690.3	29046.5	41431.3	46832.9	47799.1	47613.5	47388.6	43204.6	40020.8	37726.4	34966.4	32487.9	31048.2	30280.9	28637.8	28507.1	27942.4	29311.7	27757.9	28470.2	27499.5	28329.9
	Waste oil and reclaimed oil	t																								233535	213210	252910	247425	352922	398935	407165	405584	403668	368028	340907	321363	297853	276741	264477	257941	243944	242831	252176	256748	24904.9	257402	263812	264185
	Wood	t																								114675	104695	124189	121496	173299	195893	199934	199158	198217	180717	167399	157802	146258	135891	129869	126659	119787	119240	118889	117147	116811	11788.1	119369	119882
	BDF	kl																								1022.24	933.272	1107.04	1083.04	1544.82	1746.23	1782.26	1775.33	1766.95	1610.94	1492.23	1406.68	1303.77	1211.36	1157.68	1129.07	1067.8	1062.93	1199.48	1210.55	1162.58	1136.74	1181.03	1893.34
	RPF	t																								21463.4	19595.5	23244.1	22740.1	32435.9	36664.8	37421.2	37275.9	37099.8	33824.2	31331.6	29535.4	27374.7	25434.3	24307.2	23706.5	22420.1	22317.8	24757.3	28492.3	28894.6	32105.5	31315.7	33308.7
	Gasoline	kl																								18900.7	17255.8	20468.8	20024.9	28563.1	32287.1	32953.2	32825.2	32670.2	29785.7	27590.7	26008.9	24106.2	22397.5	21404.9	20876	19743.2	19653.1	19295.1	19284	19224.9	19077.3	19236	19047.8
	Fuel oil B	kl																								663.744	605.978	718.81	703.223	1003.06	1133.84	1157.23	1152.73	1147.29	1045.99	968.913	913.365	846.546	786.541	751.685	733.109	693.329	690.164	771.36	763.978	782.432	793.504	771.36	775.05
	RDF	t																								351.394	320.812	380.547	372.295	531.033	600.267	612.65	610.271	607.389	553.762	512.954	483.546	448.171	416.404	397.951	388.117	367.057	365.381	365.381	365.381	365.381	365.381	365.381	365.381
	Coke	t																								41581.6	37962.8	45031.4	44054.9	62838.9	71031.6	72497	72215.4	71874.4	65528.5	60699.5	57219.6	53033.6	49274.5	47090.9	45927.1	43435	43236.7	57881.5	29507.3	22266.1	23639	21328.6	20501.9
	Coke oven gas	千m3																								177.472	162.026	192.195	188.028	268.198	303.165	309.419	308.218	306.762	279.678	259.068	244.215	226.349	210.305	200.985	196.018	185.382	184.536	184.536	184.536	184.536	184.536	184.536	184.536
	Crude oil	kl																								883.809	806.891	957.132	936.377	1335.63	1509.76	1540.91	1534.92	1527.68	1392.79	1290.16	1216.19	1127.22	1047.32	1000.91	976.172	923.203	918.988	5019.37	6488.28	1682.97	3199.85	3229.38	3657.5
[truncated: 37 more columns]

## Sheet: AD_IW_Innovation
	Collection and transportation
		単位																								1990	1991	1992	1993	1994	1995	1996	1997	1998	1999	2000	2001	2002	2003	2004	2005	2006	2007	2008	2009	2010	2011	2012	2013
	Gasoline	kl																								11501	10500	12455.1	12185	17380.4	19646.5	20051.8	19973.9	19879.5	18124.4	16788.7	15826.2	14668.4	13628.7	13024.7	12702.9	12013.6	11958.7	11772.2	11427.5	11504.6	11496.4	11427.5	11480.2
	Diesel oil	kl																								626902	572342	678911	664189	947385	1.0709e+06	1.09299e+06	1.08875e+06	1.08361e+06	987934	915131	862667	799557	742883	709961	692416	654844	651855	648842	641469	649130	666093	698412	713932
	LPG	kl																								1400.08	1278.23	1516.24	1483.36	2115.83	2391.68	2441.02	2431.54	2420.06	2206.39	2043.8	1926.63	1785.68	1659.11	1585.58	1546.4	1462.49	1455.81	1455.81	1455.81	1463.92	1463.92	1463.92	1463.92
	Natural gas	千m3																								1045.19	954.224	1131.9	1107.35	1579.5	1785.44	1822.27	1815.19	1806.62	1647.11	1525.73	1438.26	1333.04	1238.55	1183.67	1154.41	1091.77	1086.79	1086.79	1086.79	1086.79	1086.79	1086.79	1086.79
	Fuel oil A	kl																								1306.48	1192.78	1414.87	1384.19	1974.38	2231.79	2277.84	2268.99	2258.27	2058.89	1907.16	1797.83	1666.3	1548.19	1479.58	1443.02	1364.72	1358.49	1411.2	1459.87	1480.14	1467.98	1455.81	1447.7
	Diesel oil mixed with 5% or less of BDF	kl																								308.096	281.282	333.657	326.421	465.6	526.304	537.161	535.075	532.548	485.529	449.749	423.965	392.949	365.096	348.917	340.294	321.829	320.36	320.36	320.36	320.36	320.36	320.36	320.36
	BDF-B100	kl																								2090.37	1908.45	2263.8	2214.71	3159.01	3570.87	3644.54	3630.38	3613.24	3294.22	3051.46	2876.52	2666.08	2477.11	2367.33	2308.83	2183.55	2173.58	2258.74	2266.85	2088.42	2206.02	2157.36	1772.12
	Treatment plant and yard truck
		単位																								1990	1991	1992	1993	1994	1995	1996	1997	1998	1999	2000	2001	2002	2003	2004	2005	2006	2007	2008	2009	2010	2011	2012	2013
	Electricity	MWh																								2.13739e+06	1.95137e+06	2.31471e+06	2.26452e+06	3.23006e+06	3.65118e+06	3.7265e+06	3.71203e+06	3.6945e+06	3.36831e+06	3.12009e+06	2.94122e+06	2.72605e+06	2.53282e+06	2.42058e+06	2.36076e+06	2.23266e+06	2.22246e+06	2.23651e+06	2.22248e+06	2.32893e+06	2.22289e+06	2.29454e+06	2.32183e+06
	City gas	千m3																								59556	54372.8	64496.9	63098.3	90002	101736	103835	103432	102943	93854.2	86937.9	81953.7	75958.3	70574.2	67446.7	65779.9	62210.5	61926.5	63546.7	66897.9	66377.5	66661.7	68787.6	69230.4
	Natural gas	千m3																								5231.87	4776.54	5665.92	5543.05	7906.49	8937.31	9121.68	9086.26	9043.35	8244.9	7637.31	7199.46	6672.77	6199.8	5925.05	5778.63	5465.06	5440.11	4842.22	4698.28	5960.51	6122.9	5576.67	5672.63
	Diesel oil	kl																								147014	134219	159211	155758	222170	251136	256317	255321	254116	231679	214606	202303	187503	174213	166492	162378	153567	152866	150570	151629	154704	160026	161129	165097
	Kerosene	kl																								82027.4	74888.6	88832.7	86906.3	123961	140123	143014	142458	141785	129267	119741	112876	104619	97203.1	92895.5	90599.7	85683.6	85292.4	80789.8	79210.1	76837	84155.7	91991.1	88809.7
	Fuel oil A	kl																								141711	129378	153468	150140	214156	242077	247071	246112	244950	223323	206865	195006	180740	167929	160487	156521	148028	147352	125433	103322	106883	112460	103742	98811.5
	Fuel oil C	kl																								15124.1	13807.9	16378.9	16023.7	22855.9	25835.7	26368.7	26266.3	26142.3	23834.1	22077.7	20812	19289.5	17922.2	17128	16704.7	15798.3	15726.1	16172.7	14718.6	11330.5	13297.6	12736.7	12319.6
	LPG	t																								11979.3	10936.8	12973.2	12691.9	18103.4	20463.6	20885.8	20804.7	20706.4	18878.2	17487.1	16484.5	15278.6	14195.6	13566.5	13231.2	12513.3	12456.2	12349.1	12208.9	12234.7	12308.5	12275.3	12238.4
	Coal	t																								27415.8	25029.8	29690.3	29046.5	41431.3	46832.9	47799.1	47613.5	47388.6	43204.6	40020.8	37726.4	34966.4	32487.9	31048.2	30280.9	28637.8	28507.1	27942.4	29311.7	27757.9	28470.2	27499.5	28329.9
	Waste oil and reclaimed oil	t																								233535	213210	252910	247425	352922	398935	407165	405584	403668	368028	340907	321363	297853	276741	264477	257941	243944	242831	252176	256748	24904.9	257402	263812	264185
	Wood	t																								114675	104695	124189	121496	173299	195893	199934	199158	198217	180717	167399	157802	146258	135891	129869	126659	119787	119240	118889	117147	116811	11788.1	119369	119882
	BDF	kl																								1022.24	933.272	1107.04	1083.04	1544.82	1746.23	1782.26	1775.33	1766.95	1610.94	1492.23	1406.68	1303.77	1211.36	1157.68	1129.07	1067.8	1062.93	1199.48	1210.55	1162.58	1136.74	1181.03	1893.34
	RPF	t																								21463.4	19595.5	23244.1	22740.1	32435.9	36664.8	37421.2	37275.9	37099.8	33824.2	31331.6	29535.4	27374.7	25434.3	24307.2	23706.5	22420.1	22317.8	24757.3	28492.3	28894.6	32105.5	31315.7	33308.7
	Gasoline	kl																								18900.7	17255.8	20468.8	20024.9	28563.1	32287.1	32953.2	32825.2	32670.2	29785.7	27590.7	26008.9	24106.2	22397.5	21404.9	20876	19743.2	19653.1	19295.1	19284	19224.9	19077.3	19236	19047.8
	Fuel oil B	kl																								663.744	605.978	718.81	703.223	1003.06	1133.84	1157.23	1152.73	1147.29	1045.99	968.913	913.365	846.546	786.541	751.685	733.109	693.329	690.164	771.36	763.978	782.432	793.504	771.36	775.05
	RDF	t																								351.394	320.812	380.547	372.295	531.033	600.267	612.65	610.271	607.389	553.762	512.954	483.546	448.171	416.404	397.951	388.117	367.057	365.381	365.381	365.381	365.381	365.381	365.381	365.381
	Coke	t																								41581.6	37962.8	45031.4	44054.9	62838.9	71031.6	72497	72215.4	71874.4	65528.5	60699.5	57219.6	53033.6	49274.5	47090.9	45927.1	43435	43236.7	57881.5	29507.3	22266.1	23639	21328.6	20501.9
	Coke oven gas	千m3																								177.472	162.026	192.195	188.028	268.198	303.165	309.419	308.218	306.762	279.678	259.068	244.215	226.349	210.305	200.985	196.018	185.382	184.536	184.536	184.536	184.536	184.536	184.536	184.536
	Crude oil	kl																								883.809	806.891	957.132	936.377	1335.63	1509.76	1540.91	1534.92	1527.68	1392.79	1290.16	1216.19	1127.22	1047.32	1000.91	976.172	923.203	918.988	5019.37	6488.28	1682.97	3199.85	3229.38	3657.5
[truncated: 37 more columns]

## Sheet: AD_IW_Advanced innovation
	Collection and transportation
		単位																								1990	1991	1992	1993	1994	1995	1996	1997	1998	1999	2000	2001	2002	2003	2004	2005	2006	2007	2008	2009	2010	2011	2012	2013
	Gasoline	kl																								11501	10500	12455.1	12185	17380.4	19646.5	20051.8	19973.9	19879.5	18124.4	16788.7	15826.2	14668.4	13628.7	13024.7	12702.9	12013.6	11958.7	11772.2	11427.5	11504.6	11496.4	11427.5	11480.2
	Diesel oil	kl																								626902	572342	678911	664189	947385	1.0709e+06	1.09299e+06	1.08875e+06	1.08361e+06	987934	915131	862667	799557	742883	709961	692416	654844	651855	648842	641469	649130	666093	698412	713932
	LPG	kl																								1400.08	1278.23	1516.24	1483.36	2115.83	2391.68	2441.02	2431.54	2420.06	2206.39	2043.8	1926.63	1785.68	1659.11	1585.58	1546.4	1462.49	1455.81	1455.81	1455.81	1463.92	1463.92	1463.92	1463.92
	Natural gas	千m3																								1045.19	954.224	1131.9	1107.35	1579.5	1785.44	1822.27	1815.19	1806.62	1647.11	1525.73	1438.26	1333.04	1238.55	1183.67	1154.41	1091.77	1086.79	1086.79	1086.79	1086.79	1086.79	1086.79	1086.79
	Fuel oil A	kl																								1306.48	1192.78	1414.87	1384.19	1974.38	2231.79	2277.84	2268.99	2258.27	2058.89	1907.16	1797.83	1666.3	1548.19	1479.58	1443.02	1364.72	1358.49	1411.2	1459.87	1480.14	1467.98	1455.81	1447.7
	Diesel oil mixed with 5% or less of BDF	kl																								308.096	281.282	333.657	326.421	465.6	526.304	537.161	535.075	532.548	485.529	449.749	423.965	392.949	365.096	348.917	340.294	321.829	320.36	320.36	320.36	320.36	320.36	320.36	320.36
	BDF-B100	kl																								2090.37	1908.45	2263.8	2214.71	3159.01	3570.87	3644.54	3630.38	3613.24	3294.22	3051.46	2876.52	2666.08	2477.11	2367.33	2308.83	2183.55	2173.58	2258.74	2266.85	2088.42	2206.02	2157.36	1772.12
	Treatment plant and yard truck
		単位																								1990	1991	1992	1993	1994	1995	1996	1997	1998	1999	2000	2001	2002	2003	2004	2005	2006	2007	2008	2009	2010	2011	2012	2013
	Electricity	MWh																								2.13739e+06	1.95137e+06	2.31471e+06	2.26452e+06	3.23006e+06	3.65118e+06	3.7265e+06	3.71203e+06	3.6945e+06	3.36831e+06	3.12009e+06	2.94122e+06	2.72605e+06	2.53282e+06	2.42058e+06	2.36076e+06	2.23266e+06	2.22246e+06	2.23651e+06	2.22248e+06	2.32893e+06	2.22289e+06	2.29454e+06	2.32183e+06
	City gas	千m3																								59556	54372.8	64496.9	63098.3	90002	101736	103835	103432	102943	93854.2	86937.9	81953.7	75958.3	70574.2	67446.7	65779.9	62210.5	61926.5	63546.7	66897.9	66377.5	66661.7	68787.6	69230.4
	Natural gas	千m3																								5231.87	4776.54	5665.92	5543.05	7906.49	8937.31	9121.68	9086.26	9043.35	8244.9	7637.31	7199.46	6672.77	6199.8	5925.05	5778.63	5465.06	5440.11	4842.22	4698.28	5960.51	6122.9	5576.67	5672.63
	Diesel oil	kl																								147014	134219	159211	155758	222170	251136	256317	255321	254116	231679	214606	202303	187503	174213	166492	162378	153567	152866	150570	151629	154704	160026	161129	165097
	Kerosene	kl																								82027.4	74888.6	88832.7	86906.3	123961	140123	143014	142458	141785	129267	119741	112876	104619	97203.1	92895.5	90599.7	85683.6	85292.4	80789.8	79210.1	76837	84155.7	91991.1	88809.7
	Fuel oil A	kl																								141711	129378	153468	150140	214156	242077	247071	246112	244950	223323	206865	195006	180740	167929	160487	156521	148028	147352	125433	103322	106883	112460	103742	98811.5
	Fuel oil C	kl																								15124.1	13807.9	16378.9	16023.7	22855.9	25835.7	26368.7	26266.3	26142.3	23834.1	22077.7	20812	19289.5	17922.2	17128	16704.7	15798.3	15726.1	16172.7	14718.6	11330.5	13297.6	12736.7	12319.6
	LPG	t																								11979.3	10936.8	12973.2	12691.9	18103.4	20463.6	20885.8	20804.7	20706.4	18878.2	17487.1	16484.5	15278.6	14195.6	13566.5	13231.2	12513.3	12456.2	12349.1	12208.9	12234.7	12308.5	12275.3	12238.4
	Coal	t																								27415.8	25029.8	29690.3	29046.5	41431.3	46832.9	47799.1	47613.5	47388.6	43204.6	40020.8	37726.4	34966.4	32487.9	31048.2	30280.9	28637.8	28507.1	27942.4	29311.7	27757.9	28470.2	27499.5	28329.9
	Waste oil and reclaimed oil	t																								233535	213210	252910	247425	352922	398935	407165	405584	403668	368028	340907	321363	297853	276741	264477	257941	243944	242831	252176	256748	24904.9	257402	263812	264185
	Wood	t																								114675	104695	124189	121496	173299	195893	199934	199158	198217	180717	167399	157802	146258	135891	129869	126659	119787	119240	118889	117147	116811	11788.1	119369	119882
	BDF	kl																								1022.24	933.272	1107.04	1083.04	1544.82	1746.23	1782.26	1775.33	1766.95	1610.94	1492.23	1406.68	1303.77	1211.36	1157.68	1129.07	1067.8	1062.93	1199.48	1210.55	1162.58	1136.74	1181.03	1893.34
	RPF	t																								21463.4	19595.5	23244.1	22740.1	32435.9	36664.8	37421.2	37275.9	37099.8	33824.2	31331.6	29535.4	27374.7	25434.3	24307.2	23706.5	22420.1	22317.8	24757.3	28492.3	28894.6	32105.5	31315.7	33308.7
	Gasoline	kl																								18900.7	17255.8	20468.8	20024.9	28563.1	32287.1	32953.2	32825.2	32670.2	29785.7	27590.7	26008.9	24106.2	22397.5	21404.9	20876	19743.2	19653.1	19295.1	19284	19224.9	19077.3	19236	19047.8
	Fuel oil B	kl																								663.744	605.978	718.81	703.223	1003.06	1133.84	1157.23	1152.73	1147.29	1045.99	968.913	913.365	846.546	786.541	751.685	733.109	693.329	690.164	771.36	763.978	782.432	793.504	771.36	775.05
	RDF	t																								351.394	320.812	380.547	372.295	531.033	600.267	612.65	610.271	607.389	553.762	512.954	483.546	448.171	416.404	397.951	388.117	367.057	365.381	365.381	365.381	365.381	365.381	365.381	365.381
	Coke	t																								41581.6	37962.8	45031.4	44054.9	62838.9	71031.6	72497	72215.4	71874.4	65528.5	60699.5	57219.6	53033.6	49274.5	47090.9	45927.1	43435	43236.7	57881.5	29507.3	22266.1	23639	21328.6	20501.9
	Coke oven gas	千m3																								177.472	162.026	192.195	188.028	268.198	303.165	309.419	308.218	306.762	279.678	259.068	244.215	226.349	210.305	200.985	196.018	185.382	184.536	184.536	184.536	184.536	184.536	184.536	184.536
	Crude oil	kl																								883.809	806.891	957.132	936.377	1335.63	1509.76	1540.91	1534.92	1527.68	1392.79	1290.16	1216.19	1127.22	1047.32	1000.91	976.172	923.203	918.988	5019.37	6488.28	1682.97	3199.85	3229.38	3657.5
[truncated: 37 more columns]
