# Supplementary material for: Japan’s greenhouse gas reduction scenarios toward net zero by 2050 in the material cycles and waste management sector
Source: Springer Nature journal article supplement (doi:10.1007/s10163-023-01650-7), 2023-04-25
Supplement: MOESM12 [file 25283090]

## Sheet: Municipal waste amount
	Municipal waste data (Advanced innovation scenario)
	Total municipal waste generation
		Unit	1990	1991	1992	1993	1994	1995	1996	1997	1998	1999	2000	2001	2002	2003	2004	2005	2006	2007	2008	2009	2010	2011	2012	2013	2014	2015	2016	2017	2018	2019	2020	2021	2022	2023	2024	2025	2026	2027	2028	2029	2030	2031	2032	2033	2034	2035	2036
	Municipal waste generation	kt（wet）	50256	51132	50904	51267	51799	52224	52849	53098	53605	53698	54834	54682	54199	54270	53376	52720	52024	50816	48107	46252	45359	45430	45234	44874	44317	43981	43170	42894	42727	42736	42314.2	41946.2	41680.3	41403.1	41229.5	40820.4	40525.3	40222.8	40024.4	39596.5	39273.2	38887.9	38738.4	38268.1	37898.4	37523.2	37246.2
	Municipal waste incineration	kt（wet）	36668	37575	37840	38233	38948	39499	40345	41039	41398	41545	42133	42185.2	41973.4	41933	40940.7	40251.3	39913.8	38773	37233	35988.5	35253.6	35739	36734	36141	34912	34883	34293	34247	34170	34629	34230.3	33851.6	33555.6	33250.4	33029	32617.1	32296.6	31970	31727.6	31299.7	30956.3	30334.3	29762.7	29000.8	28293.2	27582.7	26933
	Amount of composting (amount of waste sent)	kt（wet）	88	57	58	63	49	50	50	54	62.5	59.9	68.5	65.5	65.7	71.3	65.912	99	115	129	136	152	165	184	160	166	175	182	219	225	216	216	214.6	212.584	211.093	209.543	208.52	206.295	204.606	202.879	201.681	199.317	197.484	196.25	195.517	193.685	192.358	191.003	190.142
	Paper/ cardboard
		Unit	1990	1991	1992	1993	1994	1995	1996	1997	1998	1999	2000	2001	2002	2003	2004	2005	2006	2007	2008	2009	2010	2011	2012	2013	2014	2015	2016	2017	2018	2019	2020	2021	2022	2023	2024	2025	2026	2027	2028	2029	2030	2031	2032	2033	2034	2035	2036
	Generation	kt（wet）																													14893	14896.1	14749.1	14620.8	14528.2	14431.5	14371	14228.4	14125.6	14020.1	13951	13801.8	13689.1	13837	13785.4	13656.2	13562.6	13467.1	13406.4
	Incineration	kt（wet）	11445.7	11753.6	11856.6	12001.9	12233.2	12395.4	12627.8	12841.4	12892	13188	13579	13856	14200	14562	14332	13990.8	13308.6	13167.3	12383.8	11437.6	11808.9	12245	12734	12351	12021	11483	11348	10815	10950	11079	11037.5	10964.4	10918.3	10869.1	10846.9	10763.1	10706.8	10648.6	10617.4	10526.5	10462.8	10003	9542.43	9081.65	8620.21	8158.25	7696.25
	Amount of composting (amount of waste sent)	kt（wet）	28.16	18.24	18.56	20.16	15.68	16	16	17.28	20	19.4376	22.5365	21.8115	22.5351	25.2402	23.7283	NO	NO	NO	NO	NO	NO	NO	NO	NO	NO	NO	NO	NO	NO	NO	NO	NO	NO	NO	NO	NO	NO	NO	NO	NO	NO	NO	NO	NO	NO	NO	NO
	Amount directly landfilled	kt（wet）	1382.54	1369.81	1100.58	1179.71	995.976	973.237	880.461	756.76	694	671	678	620	518	513	490	311	255	65	183	151	142	127	126	127	112	91	85	78	88	78	66.5294	55.0588	43.5882	32.1176	20.6471	9.17647	8.25882	7.34118	6.42353	5.50588	4.58824	3.63388	2.69788	1.78024	0.880941	0	0
	Amount landfilled after intermediate treatment (intermediate treatment other than incineration)	kt（wet）	42.1296	83.7328	86.7926	91.6454	98.1269	100.874	106.072	111.945	123	162	194	214	203	173	79	304	393	272	287	224	247	241	199	155	116	86	71	43	39	17	14.5	12	9.5	7	4.5	2	1.8	1.6	1.4	1.2	1	0.8	0.6	0.4	0.2	0	0
	Plastics＋PET bottles
		Unit	1990	1991	1992	1993	1994	1995	1996	1997	1998	1999	2000	2001	2002	2003	2004	2005	2006	2007	2008	2009	2010	2011	2012	2013	2014	2015	2016	2017	2018	2019	2020	2021	2022	2023	2024	2025	2026	2027	2028	2029	2030	2031	2032	2033	2034	2035	2036
	Generation	kt（wet）	6274	6278	6147	6135	6132	6144	6217	6149	6151	6758	7206	7264	7251	7180	6815	5790	5410.6	4884	5059	4498	4215	4617	5153	5466	4561	4540	4474	4681	4672	4852	4659.96	4620.82	4591.88	4561.69	4542.92	4499.24	4475.7	4451.35	4438.34	4400.33	4373.71	4346.37	4325.8	4177.94	4041.8	3905.02	3779.67
	Incineration	kt（wet）	4997	5052	5032	5023	5098	5200	5403	5506	5725	5813	6149	6179	6142.47	6055	5578	4434.6	3609.5	3406.65	3698.99	3227.59	2907.49	3180.99	3675.98	3704.94	3260.9	3282.91	3260.87	3469.87	3452.88	3566.76	3358.08	3257.25	3162.97	3067.04	2978.39	2871.14	2777.21	2681.6	2592.84	2485.06	2383.87	2341.87	2302.25	2170.65	2044.15	1914.15	1795.56
	Liquefaction	kt（wet）	0	0	0	0	0	0	0	0	0	0	3.361	7.981	6.831	5.847	6.426	6.993	4.389	4.258	2.73	6.729	1.057	0	0	0	0	0	0	0	0	0	0	0	0	0	0	0	0	0	0	0	0	0	0	0	0	0	0
	Blast furnace reducing agent	kt（wet）	0	0	0	0	0	0	0	0	0	0	25.1226	42.8298	47.0249	59.5552	56.2112	36.8039	38.9197	32.8417	17.3479	27.5982	26.7059	25.8376	26.0569	30.4889	26.9425	30.5898	29.3956	28.243	28.5079	27.7193	26.1239	25.5593	25.0634	24.5591	24.1318	23.5366	23.0772	22.6122	22.2237	21.6667	21.1865	21.3281	21.5154	20.8446	20.2527	19.6565	18.8256
	Coke oven chemical feedstock	kt（wet）	0	0	0	0	0	0	0	0	0	0	10.9046	51.9067	92.1625	122.583	138.931	175.231	155.992	142.561	141.587	149.83	176.847	169.302	171.36	0	17.3896	29.0281	24.7518	32.161	17.1205	24.1554	22.7652	22.2731	21.841	21.4016	21.0292	20.5105	20.1101	19.7049	19.3664	18.881	18.4626	18.5859	18.7492	18.1646	17.6488	17.1293	16.4052
	Gasification	kt（wet）	0	0	0	0	0	0	0	0	0	0	0.638	7.529	11.188	28.076	52.203	58.641	54.559	56.531	46.682	44.583	52.988	51.364	61.579	58.476	50.727	54.995	54.545	57.108	46.275	44.697	42.1245	41.2141	40.4145	39.6013	38.9122	37.9525	37.2117	36.4619	35.8355	34.9374	34.163	34.3913	34.6933	33.6116	32.6572	31.6959	30.3561
	Material recycle (direct＋after incineration)	kt（wet）																													1111	1108	1166.67	1266.54	1369.15	1471.43	1576.79	1675.43	1779.5	1883.35	1990.26	2090.44	2193.68	2196.52	2201.2	2171.57	2145.1	2118.45	2082.43
	Material recycle (direct＋after incineration) (amount of waste sent)	kt（wet）																													1330	1316.49	1386.2	1504.86	1626.79	1748.31	1873.49	1990.7	2114.36	2237.75	2364.78	2483.8	2606.47	2609.85	2615.4	2580.2	2548.74	2517.09	2474.28
	Final disposal (direct＋intermediate treatment other than incineration)	kt（wet）																													42	41.9083	39.2891	36.6698	34.0505	31.4312	28.812	26.1927	23.5734	20.9542	18.3349	15.7156	13.0964	10.4771	7.85781	5.23854	2.61927	0	0
	Food waste
		Unit	1990	1991	1992	1993	1994	1995	1996	1997	1998	1999	2000	2001	2002	2003	2004	2005	2006	2007	2008	2009	2010	2011	2012	2013	2014	2015	2016	2017	2018	2019	2020	2021	2022	2023	2024	2025	2026	2027	2028	2029	2030	2031	2032	2033	2034	2035	2036
	Generation	kt（wet）																													12964	12966.7	12836.5	12671.9	12538.9	12402.4	12297.4	12120.3	11975.5	11828.3	11712.8	11527.4	11373.9	11302.8	11260.6	11155.1	11078.7	11000.7	10951
	Incineration	kt（wet）	13881.9	14255.3	14380.2	14556.4	14837	15033.8	15315.6	15574.6	15636	16221	17029	16910	16288	15511	15155	14728.8	14917.4	15459.3	14429.7	14140.3	13365.8	13647	13615	13328	13075	12969	12209	12109	12136	12237	12117.2	11962.6	11837.6	11709.3	11610.9	11444.3	11308.2	11169.9	11061.6	10887.2	10742.9	10675.7	10635.8	10536.2	10464	10390.3	10343.4
	Amount of composting (amount of waste sent)	kt（wet）	35.2	22.8	23.2	25.2	19.6	20	20	21.6	25	24.8585	29.455	27.8375	27.0684	28.0922	25.9693	65.835	81.075	93.525	98.872	108.072	117.315	142.968	120.32	121.346	114.8	121.758	134.028	141.075	132.624	132.84	131.752	130.284	129.139	127.959	127.102	125.506	124.24	122.95	121.985	120.304	118.949	118.206	117.764	116.661	115.862	115.046	114.527
	Amount directly landfilled	kt（wet）	1678	1622	1244	1374	1127	1048	933	780	716	712	730	642	505	474	439	209	188	136	93	71	67.6223	61	55	54	48	42	37	37	40	35	29.8529	24.7059	19.5588	14.4118	9.26471	4.11765	3.70588	3.29412	2.88235	2.47059	2.05882	1.64706	1.23529	0.823529	0.411765	0	0
	Amount landfilled after intermediate treatment (intermediate treatment other than incineration)	kt（wet）	16.7833	33.357	34.5759	36.5092	39.0912	40.1856	42.2565	44.5961	49	51	55	51	44	43	43	103	82	59	60	47	52	48	34	29	23	20	16	14	13	8	6.82353	5.64706	4.47059	3.29412	2.11765	0.941176	0.847059	0.752941	0.658824	0.564706	0.470588	0.376471	0.282353	0.188235	0.0941176	0	0
	Textile
		Unit	1990	1991	1992	1993	1994	1995	1996	1997	1998	1999	2000	2001	2002	2003	2004	2005	2006	2007	2008	2009	2010	2011	2012	2013	2014	2015	2016	2017	2018	2019	2020	2021	2022	2023	2024	2025	2026	2027	2028	2029	2030	2031	2032	2033	2034	2035	2036
	Generation	kt（wet）																													1228	1228.26	1216.13	1205.56	1197.92	1189.95	1184.96	1173.2	1164.72	1156.03	1150.33	1138.03	1128.74	1117.66	1113.36	1099.85	1089.22	1078.44	1070.48
	Incineration	kt（wet）	1210.98	1243.56	1254.45	1269.82	1294.3	1311.46	1336.05	1358.65	1364	1302	1105	1106.37	1187	1204	722	1401.5	1641.4	1356.71	1697.6	1876.7	1628.1	1347	1166	1170	1094	1234	1156	1166	1023	1028	1024.15	1017.37	1013.08	1008.52	1006.47	998.691	993.467	988.061	985.174	976.737	970.828	940.784	913.675	882.025	853.333	825.118	799.57
	Amount of composting (amount of waste sent)	kt（wet）	2.904	1.881	1.914	2.079	1.617	1.65	1.65	1.782	2.0625	1.76705	1.781	1.6375	1.6425	1.7112	0.527296	NO	NO	NO	NO	NO	NO	NO	NO	NO	NO	NO	NO	NO	NO	NO	NO	NO	NO	NO	NO	NO	NO	NO	NO	NO	NO	NO	NO	NO	NO	NO	NO
	Amount directly landfilled	kt（wet）	137.457	136.191	109.423	117.291	99.0236	96.7628	87.5387	75.2398	69	64	56	53	47	51	53	37	21	9	13	10	8	6	5	5	5	5	4	3	3	3	2.55882	2.11765	1.67647	1.23529	0.794118	0.352941	0.317647	0.282353	0.247059	0.211765	0.176471	0.141176	0.105882	0.0705882	0.0352941	0	0
	Amount landfilled after intermediate treatment (intermediate treatment other than incineration)	kt（wet）	8.22041	16.3381	16.9351	17.882	19.1467	19.6828	20.6971	21.843	24	30	36	50	60	85	123	141	50	68	14	1	0	11	8	6	5	4	3	2	1	1	0.852941	0.705882	0.558824	0.411765	0.264706	0.117647	0.105882	0.0941176	0.0823529	0.0705882	0.0588235	0.0470588	0.0352941	0.0235294	0.0117647	0	0
	Wood, bamboo, and grasses
		Unit	1990	1991	1992	1993	1994	1995	1996	1997	1998	1999	2000	2001	2002	2003	2004	2005	2006	2007	2008	2009	2010	2011	2012	2013	2014	2015	2016	2017	2018	2019	2020	2021	2022	2023	2024	2025	2026	2027	2028	2029	2030	2031	2032	2033	2034	2035	2036
	Generation	kt（wet）																													4990	4991.05	4941.79	4898.81	4867.76	4835.38	4815.11	4767.33	4732.87	4697.54	4674.37	4624.4	4586.64	4541.64	4524.18	4469.25	4426.07	4382.25	4349.9
	Incineration	kt（wet）	3418.97	3510.95	3541.72	3585.11	3654.2	3702.67	3772.09	3835.89	3851	3321	2528	2448	2438	2808	3442	4107.4	4984.7	4284.81	3572.9	3734.5	3485.1	3294	3362	3503	3584	4036	4608	4855	4720	4786	4768.08	4736.51	4716.56	4695.33	4685.75	4649.55	4625.23	4600.06	4586.62	4547.34	4519.83	4491.57	4474.8	4432.87	4402.5	4371.5	4351.78
	Amount of composting (amount of waste sent)	kt（wet）	8.184	5.301	5.394	5.859	4.557	4.65	4.65	5.022	5.8125	4.4925	3.9045	3.7335	3.7449	4.7771	5.66843	33.165	33.925	35.475	37.128	43.928	47.685	41.032	39.68	44.654	60.2	60.242	84.972	83.925	83.376	83.16	82.8487	82.3002	81.9534	81.5845	81.4181	80.7891	80.3665	79.9291	79.6956	79.013	78.5351	78.044	77.7527	77.0242	76.4964	75.9577	75.6151
	Amount directly landfilled	kt（wet）	623	402	316	341	291	273	262	237	206	173	141	117	97	105	118	68	75	61	39	30	25	19	19	89	24	20	22	21	23	20	17.0588	14.1176	11.1765	8.23529	5.29412	2.35294	2.11765	1.88235	1.64706	1.41176	1.17647	0.941176	0.705882	0.470588	0.235294	0	0
	Amount landfilled after intermediate treatment (intermediate treatment other than incineration)	kt（wet）	37.6769	74.883	77.6194	81.9593	87.7558	90.2127	94.8616	100.114	110	122	141	102	89	79	90	79	84	89	58	46	47	47	38	30	25	20	17	12	12	8	6.82353	5.64706	4.47059	3.29412	2.11765	0.941176	0.847059	0.752941	0.658824	0.564706	0.470588	0.376471	0.282353	0.188235	0.0941176	0	0
	Human waste and Johkasou sludge
		Unit	1990	1991	1992	1993	1994	1995	1996	1997	1998	1999	2000	2001	2002	2003	2004	2005	2006	2007	2008	2009	2010	2011	2012	2013	2014	2015	2016	2017	2018	2019	2020	2021	2022	2023	2024	2025	2026	2027	2028	2029	2030	2031	2032	2033	2034	2035	2036
	Volume of human waste treated at human waste treatment plants	kt（wet）	29630	30066	29982	29994	29707	29594	29782	29344	29145	28489	27907	27697	26406	26187	25013	24191	23953	23248	22958	22343	21678	20912	20538	20497	19937	19690	19539	19163	18957	18956	19068.4	18615.4	18547.6	18537.8	18522.5	18502.5	18478.3	18450.5	18419.3	18384.5	18346	18231.3	18113.6	17993	17869.7	17743.9	17615.6
	Amount of composting (amount of waste sent)	kt（wet）																4	7	11	28	58	17	15	21	19	25	35	30	21	21	21	20.9214	20.7829	20.6953	20.6021	20.5601	20.4013	20.2946	20.1841	20.1251	19.9528	19.8321	19.7081	19.6345	19.4505	19.3173	19.1812	19.0947
	Amount directly landfilled	kt（wet）	267	196	165	163	189	87	128	77	78	63	73	58	61	65	52.545	108.973	110	54	54	47	69	61	71	39	33	30	38	42	59	59	55.3125	51.625	47.9375	44.25	40.5625	36.875	33.1875	29.5	25.8125	22.125	18.4375	14.75	11.0625	7.375	3.6875	0	0
	Amount landfilled after intermediate treatment (intermediate treatment other than incineration)	kt（wet）	127.054	128.923	128.563	128.614	127.384	126.899	127.705	125.827	135	122.161	118	116	122	111	106	102	43	26	36	34	33	16	14	13	10	8	8	10	9	10	9.375	8.75	8.125	7.5	6.875	6.25	5.625	5	4.375	3.75	3.125	2.5	1.875	1.25	0.625	0	0
	Amount of RDF production
		Unit	1990	1991	1992	1993	1994	1995	1996	1997	1998	1999	2000	2001	2002	2003	2004	2005	2006	2007	2008	2009	2010	2011	2012	2013	2014	2015	2016	2017	2018	2019	2020	2021	2022	2023	2024	2025	2026	2027	2028	2029	2030	2031	2032	2033	2034	2035	2036
	Amount of RDF production (amount of productization)	kt（wet）	33.5872	33.5872	33.5872	33.5872	33.5872	38.8222	43.6281	61.9077	79.488	128.849	148.231	175.452	241.888	326.901	384.521	414.801	395.372	397.101	385.916	376.2	380.342	389.235	384.172	386.381	388.303	360.918	359.781	359.075	362.351	362.351	341.496	334.116	327.634	321.041	315.455	307.674	301.669	295.591	290.513	283.231	276.954	278.805	281.253	272.484	264.747	256.953	246.092
	Amount of waste processed at RDF production facilities (amount of waste sent)	kt（wet）									109.318	176.465	209.513	251.258	378.648	588.696	691.992	754.97	725.636	712.447	692.53	689.978	675.576	695.169	704.037	693.991	671.075	638.92	640.692	639.734	644.661	644.661	607.558	594.427	582.895	571.166	561.228	547.386	536.701	525.887	516.853	503.899	492.731	496.023	500.379	484.777	471.012	457.147	437.823
	CO2 emissions from municipal waste incinerators
		Unit	1990	1991	1992	1993	1994	1995	1996	1997	1998	1999	2000	2001	2002	2003	2004	2005	2006	2007	2008	2009	2010	2011	2012	2013	2014	2015	2016	2017	2018	2019	2020	2021	2022	2023	2024	2025	2026	2027	2028	2029	2030	2031	2032	2033	2034	2035	2036
	Fossil-fuel derived	ktCO2	11938.3	12122	12155.3	12132	12352.5	12617	13094.4	13399.6	13779.9	13931.4	14399.1	14467.2	14561.8	14566	13200.3	11645.3	10304.1	9688.73	10482.3	9739.33	9036.66	9381.75	10160.4	10130.3	9232.24	9381.25	9239.82	9585.3	9428.87	9648.98	9234.99	8970.27	8725.52	8478.39	8253.64	7980.31	7741.4	7501.16	7282.72	7017.38	6773.81	6496.87	6233.74	5818.09	5422.31	5029.63	4663.7
	Biogenic	ktCO2	21480.6	22057.3	22210.5	22501.7	22907.2	23184.1	23576.2	23922.2	24060.9	24086.4	24005.1	24194.7	24333	24650.4	24522.8	25038	25293.6	24505.1	22771.4	21850.9	21505.5	21692.1	22156.9	21790.9	21341.4	21189.3	21211.4	20813.6	20763.3	21012.6	20913.2	20798.8	20736.1	20667.8	20650.6	20515.6	20432	20344.5	20309	20157.8	20059	19594.3	19149.5	18636.9	18144.8	17648.1	17180.1
	Total	ktCO2	33418.9	34179.2	34365.7	34633.7	35259.7	35801.1	36670.7	37321.9	37840.7	38017.9	38404.1	38661.9	38894.8	39216.4	37723.1	36683.3	35597.8	34193.8	33253.7	31590.3	30542.1	31073.8	32317.3	31921.2	30573.7	30570.6	30451.2	30398.9	30192.2	30661.6	30148.2	29769.1	29461.7	29146.2	28904.2	28495.9	28173.4	27845.7	27591.7	27175.2	26832.8	26091.1	25383.3	24454.9	23567.1	22677.7	21843.8
	Breakdown of Human waste and Johkasou sludge
		Unit	1990	1991	1992	1993	1994	1995	1996	1997	1998	1999	2000	2001	2002	2003	2004	2005	2006	2007	2008	2009	2010	2011	2012	2013	2014	2015	2016	2017	2018	2019	2020	2021	2022	2023	2024	2025	2026	2027	2028	2029	2030	2031	2032	2033	2034	2035	2036
	Volume of human waste treated at human waste treatment plants	kt（wet）	29630	30066	29982	29994	29707	29594	29782	29344	29145	28489	27907	27697	26406	26187	25013	24191	23953	23248	22958	22343	21678	20912	20538	20497	19937	19690	19539	19163	18957	18956	19068.4	18615.4	18547.6	18537.8	18522.5	18502.5	18478.3	18450.5	18419.3	18384.5	18346	18231.3	18113.6	17993	17869.7	17743.9	17615.6
	Human waste	kt（wet）	20406	20371	19716	19412	18632	18049	17726	16973	16368	15311.7	14673	14101	12720	12390	11269	10400	9864	9261	8894	8353	7917	7365	7018	6771	6375	6153	5890	5627	5422	5422	5505.06	5294.61	5277.6	5290.64	5301.88	5311.62	5320.09	5327.46	5333.78	5338.99	5342.97	5309.56	5275.29	5240.17	5204.27	5167.62	5130.25
	Johkasou sludge	kt（wet）	9224	9695	10266	10583	11074	11545	12056	12371	12777	13177.7	13234	13596	13686	13797	13744	13790	14089	13987	14064	13989	13760	13547	13519	13726	13562	13537	13648	13536	13534	13534	13563.3	13320.8	13270	13247.2	13220.6	13190.8	13158.2	13123.1	13085.5	13045.5	13003	12921.7	12838.3	12752.8	12665.5	12576.3	12485.3
	Notes
	・As for the amount directed or productized for each data, it is the amount of productized (for compost, the amount of activity in the inventory is the amount directed), if not indicated in the cell.
	・Data that do not affect GHG emissions (e.g., municipal waste volumes of inorganic materials such as metals and glass, MR volumes, etc.) are not output in the inventory-based model, because they do not involve GHG emissions. Estimations or other calculations are needed separately from the model, if necessary.
	・In the inventory, the amount of RDF production is taken from the Survey of Actual Conditions of General Waste Disposal, and the figures do not match the "fuel conversion" in the Survey of Circular Use (the data from the Survey of Actual Conditions of General Waste Disposal has a larger value). Therefore, the total of the sum of the lines 24 to 29, the plastic portion of RDF production in line 73…
[truncated: 14 more columns]
