# Supplementary material for: Japan’s greenhouse gas reduction scenarios toward net zero by 2050 in the material cycles and waste management sector
Source: Springer Nature journal article supplement (doi:10.1007/s10163-023-01650-7), 2023-04-25
Supplement: MOESM14 [file 25283090]

## Sheet: Figure of emission reductions
	Unit	1990	1991	1992	1993	1994	1995	1996	1997	1998	1999	2000	2001	2002	2003	2004	2005	2006	2007	2008	2009	2010	2011	2012	2013	2014	2015	2016	2017	2018	2019	2020	2021	2022	2023	2024	2025	2026	2027	2028	2029	2030	2031	2032	2033	2034	2035	2036	2037
	Plastics	11682.4	11677.5	12023.3	12355.6	13732.7	14649.8	15472.5	16039.4	16893.8	16758.7	17118.6	17393.1	17498.2	18390.6	18020.6	16138.2	14681.2	15074.7	15881.6	13827.7	13990.5	14008.3	15255.7	15585.5	14669.4	15244.6	15280.8	15960.7	16184	16473.6	15670.9	15112.1	14563.6	14013	13477.8	12910.3	12373.4	11835.8	11313.6	10759.1	10219.8	9994.03	9831.81	9657.5	9504.64	9354.11	9192.67	9006.4
	Waste oil	7999.54	8095	9442.15	8118.31	10161.1	9652.26	9211.97	10056.5	9460.54	9417.26	10543.7	9926.19	10193.9	10337.9	10530.9	11033.8	10668.7	11087.2	11150.4	9682.49	10267.6	9727.4	10296.6	9451.15	9662.74	9348.53	9657.12	9184.32	9798.81	9761.34	9674.84	9535.99	9397.19	9255.69	9116.98	8975.57	8836.97	8695.65	8557.14	8418.68	8277.51	8211.77	8146.08	8080.43	8014.83	7949.28	7883.77	7818.32
	Paper/ cardboard	1275.54	1311.19	1320.87	1334.4	1357.95	1375.87	1399.25	1420.91	1430.89	1464.74	1510.77	1542.13	1578.09	1609.43	1582.22	1543.45	1464.14	1446.59	1354.98	1244.94	1286.92	1335.55	1390.04	1344.64	1305.26	1243.65	1226.21	1163.73	1177.77	1191.51	1185.1	1175.9	1169.56	1162.89	1159.07	1148.65	1141.03	1133.19	1128.23	1116.89	1108.43	1099.97	1094.32	1082.49	1073.48	1064.3	1058.41	1046.6
	Nappies	331.81	329.37	347.668	374.506	400.123	406.223	434.28	458.678	423.301	424.573	414.981	418.875	449.029	536.02	542.735	539.228	547.367	558.502	572.346	583.918	589.549	601.995	616.169	628.144	640.744	639.188	655.603	666.389	678.799	687.938	701.95	708.798	717.567	726.337	737.12	743.876	753.658	763.392	775.245	782.861	792.596	800.599	810.777	816.525	824.487	832.45	837.927	838.79
	Textile	1098.79	1147.65	1189.89	1142.63	1175.45	1227.62	1278.38	1347.41	1348.35	1295.18	1092.15	1074.69	1145.15	1184.42	723.432	1367.16	1628.44	1385.36	1752.2	1964.08	1792.78	1572	1380.49	1338.34	1275.98	1449.98	1358.33	1370.08	1202.05	1207.92	1203.4	1195.44	1190.4	1185.04	1182.62	1173.49	1167.35	1161	1157.6	1147.69	1140.75	1133.61	1129.38	1118.8	1111.13	1103.31	1098.33	1087.21
	Waste tire	526.861	571.418	630.325	704.837	770.96	845.166	872.744	891.336	850.194	941.742	1044.12	1085.44	986.927	762.206	783.184	869.159	949.372	997.7	1028	950.779	1007.77	975.869	950.65	957.556	1014.27	1037.04	997.068	1036.02	1063.73	973.496	967.374	961.251	955.128	949.006	942.883	936.761	930.638	924.515	918.393	912.27	906.147	900.025	893.902	887.78	881.657	875.534	869.412	863.289
	Other	11753.7	11731	11857.9	11713.6	11769.8	11686.2	11578.2	11391.3	11091.8	10866.8	10600.6	10247.6	9748.67	9513.79	9186.23	8992.83	8572.51	8099.99	7766.47	7371.34	6935.18	6727.73	6535.45	6331.87	6006.33	5874.94	5530.15	5441.86	5280.26	5173.14	4925.92	4715.67	4509.05	4309.95	4119.91	3935.17	3820.63	3712.47	3611.01	3512.41	3419.23	3342.77	3270.67	3199.6	3132.22	3067.55	3006.63	2947.78
	Energy-derived	7597.73	7204.83	7919.6	7684.47	9686.16	10342	10491.1	10389.6	10250	9744.24	9280.55	8967.44	8710.36	8588.68	8191.96	8051.61	7674.44	7767.89	7584.33	7214.86	7270.84	7783.66	8205.5	8274.03	8143.16	7956.52	7948.43	8776.95	8745.64	8402.04	7888.05	7612.39	7342.67	7086.69	6845.12	6590.23	6231.94	5880.8	5545.14	5214.85	4892.45	4673.62	4456.25	4234.42	4018.08	3611.35	3427.95	3239.27
	CCUS
BAU
	Unit	1990	1991	1992	1993	1994	1995	1996	1997	1998	1999	2000	2001	2002	2003	2004	2005	2006	2007	2008	2009	2010	2011	2012	2013	2014	2015	2016	2017	2018	2019	2020	2021	2022	2023	2024	2025	2026	2027	2028	2029	2030	2031	2032	2033	2034	2035	2036	2037
	Plastics	11682.4	11677.5	12023.3	12355.6	13732.7	14649.8	15472.5	16039.4	16893.8	16758.7	17118.6	17393.1	17498.2	18390.6	18020.6	16138.2	14681.2	15074.7	15881.6	13827.7	13990.5	14008.3	15255.7	15585.5	14669.4	15244.6	15280.8	15960.7	16184	16473.6	16429.7	16367.8	16327.9	16284.2	16255.7	16191.9	16144.7	16096.2	16063.7	15995.8	15943.9	15891.9	15855.4	15784.6	15729	15672.9	15632.5	15558.4
	Waste oil	7999.54	8095	9442.15	8118.31	10161.1	9652.26	9211.97	10056.5	9460.54	9417.26	10543.7	9926.19	10193.9	10337.9	10530.9	11033.8	10668.7	11087.2	11150.4	9682.49	10267.6	9727.4	10296.6	9451.15	9662.74	9348.53	9657.12	9184.32	9798.81	9761.34	9677.66	9593.97	9510.28	9426.6	9342.91	9259.23	9175.54	9091.85	9008.17	8924.48	8840.8	8759.09	8677.38	8595.68	8513.97	8432.27	8350.56	8268.86
	Paper/ cardboard	1275.54	1311.19	1320.87	1334.4	1357.95	1375.87	1399.25	1420.91	1430.89	1464.74	1510.77	1542.13	1578.09	1609.43	1582.22	1543.45	1464.14	1446.59	1354.98	1244.94	1286.92	1335.55	1390.04	1344.64	1305.26	1243.65	1226.21	1163.73	1177.77	1191.51	1185.1	1175.9	1169.56	1162.89	1159.07	1148.65	1141.03	1133.19	1128.23	1116.89	1108.43	1099.97	1094.32	1082.49	1073.48	1064.3	1058.41	1046.6
	Nappies	331.81	329.37	347.668	374.506	400.123	406.223	434.28	458.678	423.301	424.573	414.981	418.875	449.029	536.02	542.735	539.228	547.367	558.502	572.346	583.918	589.549	601.995	616.169	628.144	640.744	639.188	655.603	666.389	678.799	687.938	701.95	708.798	717.567	726.337	737.12	743.876	753.658	763.392	775.245	782.861	792.596	800.599	810.777	816.525	824.487	832.45	837.927	838.79
	Textile	1098.79	1147.65	1189.89	1142.63	1175.45	1227.62	1278.38	1347.41	1348.35	1295.18	1092.15	1074.69	1145.15	1184.42	723.432	1367.16	1628.44	1385.36	1752.2	1964.08	1792.78	1572	1380.49	1338.34	1275.98	1449.98	1358.33	1370.08	1202.05	1207.92	1203.4	1195.44	1190.4	1185.04	1182.62	1173.49	1167.35	1161	1157.6	1147.69	1140.75	1133.61	1129.38	1118.8	1111.13	1103.31	1098.33	1087.21
	Waste tire	526.861	571.418	630.325	704.837	770.96	845.166	872.744	891.336	850.194	941.742	1044.12	1085.44	986.927	762.206	783.184	869.159	949.372	997.7	1028	950.779	1007.77	975.869	950.65	957.556	1014.27	1037.04	997.068	1036.02	1063.73	973.496	967.374	961.251	955.128	949.006	942.883	936.761	930.638	924.515	918.393	912.27	906.147	900.025	893.902	887.78	881.657	875.534	869.412	863.289
	Other	11753.7	11731	11857.9	11713.6	11769.8	11686.2	11578.2	11391.3	11091.8	10866.8	10600.6	10247.6	9748.67	9513.79	9186.23	8992.83	8572.51	8099.99	7766.47	7371.34	6935.18	6727.73	6535.45	6331.87	6006.33	5874.94	5530.15	5441.86	5280.26	5173.14	5016.89	4900.01	4787.7	4683.76	4589.31	4500.17	4418.56	4342.72	4273.04	4205.85	4143.66	4086.42	4033.38	3981.16	3932.44	3885.98	3842.56	3799.04
	Energy-derived	7597.73	7204.83	7919.6	7684.47	9686.16	10342	10491.1	10389.6	10250	9744.24	9280.55	8967.44	8710.36	8588.68	8191.96	8051.61	7674.44	7767.89	7584.33	7214.86	7270.84	7783.66	8205.5	8274.03	8143.16	7956.52	7948.43	8776.95	8745.64	8402.04	8155.98	7934.09	7719.95	7520.43	7332.98	7135.87	6944.15	6756.06	6577.22	6399.57	6223.96	6115.47	6010.65	5900.85	5793.81	5688.65	5590.99	5488.21
	CCUS
GHG reductions by scenario and material
	Unit	1990	1991	1992	1993	1994	1995	1996	1997	1998	1999	2000	2001	2002	2003	2004	2005	2006	2007	2008	2009	2010	2011	2012	2013	2014	2015	2016	2017	2018	2019	2020	2021	2022	2023	2024	2025	2026	2027	2028	2029	2030	2031	2032	2033	2034	2035	2036	2037
	Plastics	0	0	0	0	0	0	0	0	0	0	0	0	0	0	0	0	0	0	0	0	0	0	0	0	0	0	0	0	0	0	-758.817	-1255.75	-1764.29	-2271.21	-2777.88	-3281.59	-3771.28	-4260.41	-4750.11	-5236.71	-5724.15	-5897.9	-6023.63	-6127.11	-6224.34	-6318.84	-6439.87	-6552.03
	Waste oil	0	0	0	0	0	0	0	0	0	0	0	0	0	0	0	0	0	0	0	0	0	0	0	0	0	0	0	0	0	0	-2.81385	-57.9764	-113.09	-170.913	-225.93	-283.656	-338.575	-396.203	-451.025	-505.799	-563.281	-547.318	-531.307	-515.249	-499.143	-482.99	-466.789	-450.541
	Paper/ cardboard	0	0	0	0	0	0	0	0	0	0	0	0	0	0	0	0	0	0	0	0	0	0	0	0	0	0	0	0	0	0	0	0	0	0	0	0	0	0	0	0	0	0	0	0	0	0	0	0
	Nappies	0	0	0	0	0	0	0	0	0	0	0	0	0	0	0	0	0	0	0	0	0	0	0	0	0	0	0	0	0	0	0	0	0	0	0	0	0	0	0	0	0	0	0	0	0	0	0	0
	Textile	0	0	0	0	0	0	0	0	0	0	0	0	0	0	0	0	0	0	0	0	0	0	0	0	0	0	0	0	0	0	0	0	0	0	0	0	0	0	0	0	0	0	0	0	0	0	0	0
	Waste tire	0	0	0	0	0	0	0	0	0	0	0	0	0	0	0	0	0	0	0	0	0	0	0	0	0	0	0	0	0	0	0	0	0	0	0	0	0	0	0	0	0	0	0	0	0	0	0	0
	Other	0	0	0	0	0	0	0	0	0	0	0	0	0	0	0	0	0	0	0	0	0	0	0	0	0	0	0	0	0	0	-90.9712	-184.335	-278.646	-373.814	-469.398	-564.999	-597.932	-630.25	-662.032	-693.435	-724.431	-743.648	-762.708	-781.561	-800.214	-818.432	-835.937	-851.258
	Energy-derived	0	0	0	0	0	0	0	0	0	0	0	0	0	0	0	0	0	0	0	0	0	0	0	0	0	0	0	0	0	0	-267.931	-321.705	-377.282	-433.736	-487.854	-545.64	-712.208	-875.266	-1032.08	-1184.72	-1331.51	-1441.85	-1554.4	-1666.43	-1775.73	-2077.3	-2163.04	-2248.94
	CCUS	0	0	0	0	0	0	0	0	0	0	0	0	0	0	0	0	0	0	0	0	0	0	0	0	0	0	0	0	0	0	0	0	0	0	0	0	0	0	0	0	0	0	0	0	0	0	0	0
	Unit	1990	1991	1992	1993	1994	1995	1996	1997	1998	1999	2000	2001	2002	2003	2004	2005	2006	2007	2008	2009	2010	2011	2012	2013	2014	2015	2016	2017	2018	2019	2020	2021	2022	2023	2024	2025	2026	2027	2028	2029	2030	2031	2032	2033	2034	2035	2036	2037
	Final disposal (5A)	9604.77	9534.84	9527.06	9378.82	9266.67	9024.42	8789.9	8516.8	8199.56	7896.55	7612.49	7334.49	7049.57	6754.26	6435.68	6129.96	5814.52	5519.2	5177.08	4869.77	4553.2	4301.99	4086.58	3881.36	3658.83	3466.58	3267.11	3111.95	2949.43	2810.8	2681.84	2560.16	2445.56	2336.84	2233.29	2134.3	2039.35	1951.02	1868.52	1791.18	1718.39	1649.65	1584.52	1522.6	1463.53	1407.33	1354.32	1305.48
	Biological treatment (5B)	234.765	232.192	232.693	233.245	232.089	232.615	233.199	234.294	233.071	234.027	235.252	237.407	301.188	354.075	365.533	414.408	427.815	413.161	464.43	460.357	401.803	444.244	439.758	434.879	433.035	441.322	446.386	387.827	384.504	383.48	383.581	383.383	383.159	382.918	382.715	382.417	382.158	381.895	381.671	381.354	381.078	380.875	380.708	380.456	380.241	380.023	379.841	379.576
	Incineration (5C)	13713.8	13794	14975.6	14763.3	17420.2	17842	18395	19033.5	19032.4	18861.8	18965.9	17681.4	16992.7	17034.7	16527.3	16146.9	15242.3	15297.8	16259.1	13779.3	14012.5	13259.6	13842.8	13739.5	13153	13163.7	12413.9	12183.8	13065.6	12976.2	12135.6	11376.2	10644.2	9935.89	9263.01	8606.23	8050.01	7515.72	7011.52	6525.73	6064.67	5736.86	5431.28	5133.51	4845.91	4566.79	4535.7	4505.46
	Use as raw material or fuel (1A)	11115.2	11302.1	12076.7	11368.5	12449.1	12744	12829.1	13820.9	14033.9	14176.5	15511.3	16434.8	17256.6	18191.3	18040.8	17792.6	17027.1	17419.8	17605.4	16515.9	16902.8	16943	18056.1	17581.5	17329.8	17766.4	18577.9	19139.5	18985.9	19298.5	19128.4	19085.4	19029.6	18946.3	18857.4	18700.9	18552.1	18377.4	18199.5	17951.7	17700.3	17715.4	17780.4	17806.6	17852.8	17892.4	17677.3	17417.9
	Energy-derived CO2 emissions	7597.73	7204.83	7919.6	7684.47	9686.16	10342	10491.1	10389.6	10250	9744.24	9280.55	8967.44	8710.36	8588.68	8191.96	8051.61	7674.44	7767.89	7584.33	7214.86	7270.84	7783.66	8205.5	8274.03	8143.16	7956.52	7948.43	8814.74	8562.77	8224.93	7888.05	7612.39	7342.67	7086.69	6845.12	6590.23	6231.94	5880.8	5545.14	5214.85	4892.45	4673.62	4456.25	4234.42	4018.08	3611.35	3427.95	3239.27
	Waste plastics	0	0	0	0	0	0	0	0	0	0	0	0	0	0	0	0	0	0	0	0	0	0	0	0	0	0	0	0	0	0	758.817	1255.75	1764.29	2271.21	2777.88	3281.59	3771.28	4260.41	4750.11	5236.71	5724.15	5897.9	6023.63	6127.11	6224.34	6318.84	6439.87	6552.03
	Waste oil	0	0	0	0	0	0	0	0	0	0	0	0	0	0	0	0	0	0	0	0	0	0	0	0	0	0	0	0	0	0	2.81385	57.9764	113.09	170.913	225.93	283.656	338.575	396.203	451.025	505.799	563.281	547.318	531.307	515.249	499.143	482.99	466.789	450.541
	Paper/ cardboard	0	0	0	0	0	0	0	0	0	0	0	0	0	0	0	0	0	0	0	0	0	0	0	0	0	0	0	0	0	0	0	0	0	0	0	0	0	0	0	0	0	0	0	0	0	0	0	0
	Nappies	0	0	0	0	0	0	0	0	0	0	0	0	0	0	0	0	0	0	0	0	0	0	0	0	0	0	0	0	0	0	0	0	0	0	0	0	0	0	0	0	0	0	0	0	0	0	0	0
	Textile	0	0	0	0	0	0	0	0	0	0	0	0	0	0	0	0	0	0	0	0	0	0	0	0	0	0	0	0	0	0	0	0	0	0	0	0	0	0	0	0	0	0	0	0	0	0	0	0
	Waste tire	0	0	0	0	0	0	0	0	0	0	0	0	0	0	0	0	0	0	0	0	0	0	0	0	0	0	0	0	0	0	0	0	0	0	0	0	0	0	0	0	0	0	0	0	0	0	0	0
	Other	0	0	0	0	0	0	0	0	0	0	0	0	0	0	0	0	0	0	0	0	0	0	0	0	0	0	0	0	0	0	90.9712	184.335	278.646	373.814	469.398	564.999	597.932	630.25	662.032	693.435	724.431	743.648	762.708	781.561	800.214	818.432	835.937	851.258
	Energy-derived	0	0	0	0	0	0	0	0	0	0	0	0	0	0	0	0	0	0	0	0	0	0	0	0	0	0	0	0	0	0	267.931	321.705	377.282	433.736	487.854	545.64	712.208	875.266	1032.08	1184.72	1331.51	1441.85	1554.4	1666.43	1775.73	2077.3	2163.04	2248.94
	CCUS	0	0	0	0	0	0	0	0	0	0	0	0	0	0	0	0	0	0	0	0	0	0	0	0	0	0	0	0	0	0	0	0	0	0	0	0	0	0	0	0	0	0	0	0	0	0	0	0
	Unit	1990	1991	1992	1993	1994	1995	1996	1997	1998	1999	2000	2001	2002	2003	2004	2005	2006	2007	2008	2009	2010	2011	2012	2013	2014	2015	2016	2017	2018	2019	2020	2021	2022	2023	2024	2025	2026	2027	2028	2029	2030	2031	2032	2033	2034	2035	2036	2037
	Residual GHG emissions	42266.3	42068	44731.6	43428.3	49054.2	50185.1	50738.3	51995.1	51748.9	50913.2	51605.5	50655.5	50310.3	50923	49561.2	48535.5	46186.2	46417.9	47090.3	42840.1	43141.1	42732.5	44630.7	43911.2	42717.9	42794.5	42653.7	43637.8	43948.2	43693.8	42217.5	41017.5	39845.1	38688.6	37581.5	36414.1	35255.6	34106.8	33006.3	31864.8	30756.9	30156.4	29633.2	29077.5	28560.5	27857.9	27375.1	26847.7
	Waste plastics measures	0	0	0	0	0	0	0	0	0	0	0	0	0	0	0	0	0	0	0	0	0	0	0	0	0	0	0	0	0	0	758.817	1255.75	1764.29	2271.21	2777.88	3281.59	3771.28	4260.41	4750.11	5236.71	5724.15	5897.9	6023.63	6127.11	6224.34	6318.84	6439.87	6552.03
	Waste oil measures	0	0	0	0	0	0	0	0	0	0	0	0	0	0	0	0	0	0	0	0	0	0	0	0	0	0	0	0	0	0	2.81385	57.9764	113.09	170.913	225.93	283.656	338.575	396.203	451.025	505.799	563.281	547.318	531.307	515.249	499.143	482.99	466.789	450.541
	Paper/ cardboard measures	0	0	0	0	0	0	0	0	0	0	0	0	0	0	0	0	0	0	0	0	0	0	0	0	0	0	0	0	0	0	0	0	0	0	0	0	0	0	0	0	0	0	0	0	0	0	0	0
	Nappies measures	0	0	0	0	0	0	0	0	0	0	0	0	0	0	0	0	0	0	0	0	0	0	0	0	0	0	0	0	0	0	0	0	0	0	0	0	0	0	0	0	0	0	0	0	0	0	0	0
	Synthetic textiles measures	0	0	0	0	0	0	0	0	0	0	0	0	0	0	0	0	0	0	0	0	0	0	0	0	0	0	0	0	0	0	0	0	0	0	0	0	0	0	0	0	0	0	0	0	0	0	0	0
	Waste tire measures	0	0	0	0	0	0	0	0	0	0	0	0	0	0	0	0	0	0	0	0	0	0	0	0	0	0	0	0	0	0	0	0	0	0	0	0	0	0	0	0	0	0	0	0	0	0	0	0
	Other measures	0	0	0	0	0	0	0	0	0	0	0	0	0	0	0	0	0	0	0	0	0	0	0	0	0	0	0	0	0	0	90.9712	184.335	278.646	373.814	469.398	564.999	597.932	630.25	662.032	693.435	724.431	743.648	762.708	781.561	800.214	818.432	835.937	851.258
	Energy-derived CO2 emissions measures	0	0	0	0	0	0	0	0	0	0	0	0	0	0	0	0	0	0	0	0	0	0	0	0	0	0	0	0	0	0	267.931	321.705	377.282	433.736	487.854	545.64	712.208	875.266	1032.08	1184.72	1331.51	1441.85	1554.4	1666.43	1775.73	2077.3	2163.04	2248.94
	CCUS	0	0	0	0	0	0	0	0	0	0	0	0	0	0	0	0	0	0	0	0	0	0	0	0	0	0	0	0	0	0	0	0	0	0	0	0	0	0	0	0	0	0	0	0	0	0	0	0
																	2030	2050
																Waste plastics measures	5724.15	7982.62
																Waste oil measures	563.281	407.912
																Paper/ cardboard measures	0	0
																Nappies measures	0	0
																Synthetic textiles measures	0	0
																Waste tire measures	0	0
																Other measures	724.431	941.432
																Energy-derived CO2 emissions measures	1331.51	2456.07
																Total	8343.37	11788
[truncated: 13 more columns]

## Sheet: Figure of GHG emissions
	5.Waste Sector
									1990	1991	1992	1993	1994	1995	1996	1997	1998	1999	2000	2001	2002	2003	2004	2005	2006	2007	2008	2009	2010	2011	2012	2013	2014	2015	2016	2017	2018	2019	2020	2021	2022	2023	2024	2025	2026	2027	2028	2029	2030
								Final disposal	9604.77	9534.84	9527.06	9378.82	9266.67	9024.42	8789.9	8516.8	8199.56	7896.55	7612.49	7334.49	7049.57	6754.26	6435.68	6129.96	5814.52	5519.2	5177.08	4869.77	4553.2	4301.99	4086.58	3881.36	3658.83	3466.58	3267.11	3111.95	2949.43	2810.8	2681.84	2560.16	2445.56	2336.84	2233.29	2134.3	2039.35	1951.02	1868.52	1791.18	1718.39
								Biological treatment	234.765	232.192	232.693	233.245	232.089	232.615	233.199	234.294	233.071	234.027	235.252	237.407	301.188	354.075	365.533	414.408	427.815	413.161	464.43	460.357	401.803	444.244	439.758	434.879	433.035	441.322	446.386	387.827	384.504	383.48	383.581	383.383	383.159	382.918	382.715	382.417	382.158	381.895	381.671	381.354	381.078
								Incineration	13713.8	13794	14975.6	14763.3	17420.2	17842	18395	19033.5	19032.4	18861.8	18965.9	17681.4	16992.7	17034.7	16527.3	16146.9	15242.3	15297.8	16259.1	13779.3	14012.5	13259.6	13842.8	13739.5	13153	13163.7	12413.9	12183.8	13065.6	12976.2	12135.6	11376.2	10644.2	9935.89	9263.01	8606.23	8050.01	7515.72	7011.52	6525.73	6064.67
								Use as raw material or fuel	11115.2	11302.1	12076.7	11368.5	12449.1	12744	12829.1	13820.9	14033.9	14176.5	15511.3	16434.8	17256.6	18191.3	18040.8	17792.6	17027.1	17419.8	17605.4	16515.9	16902.8	16943	18056.1	17581.5	17329.8	17766.4	18577.9	19139.5	18985.9	19298.5	19128.4	19085.4	19029.6	18946.3	18857.4	18700.9	18552.1	18377.4	18199.5	17951.7	17700.3
								Wastewater treatment	5328.66	5327.56	5313.15	5258.14	5174.89	5188.7	5133.66	5116.19	5047.04	4937.81	4856.92	4777.42	4692.19	4662.12	4634.4	4559.75	4451.96	4367.1	4303.04	4091.46	4068.83	4036.86	3924.91	3893.25	3824.81	3776.79	3741.8	3640.38	3624.74	3614.8	3584.05	3544.68	3523.25	3503.81	3485.01	3462.67	3441.15	3419.06	3397.87	3373.31	3349.65
								Other	702.83	686.446	698.898	680.745	701.913	667.829	640.468	655.231	609.119	652.575	655.914	630.53	577.046	516.527	506.699	506.814	522.36	561.198	530.412	513.688	526.914	524.125	528.103	604.69	617.028	624.931	618.832	636.622	673.375	581.881	579.703	575.865	573.439	570.857	569.693	565.292	562.335	559.275	557.64	552.865	549.52
								Energy-derived CO2 emissions	7597.73	7204.83	7919.6	7684.47	9686.16	10342	10491.1	10389.6	10250	9744.24	9280.55	8967.44	8710.36	8588.68	8191.96	8051.61	7674.44	7767.89	7584.33	7214.86	7270.84	7783.66	8205.5	8274.03	8143.16	7956.52	7948.43	8776.95	8745.64	8402.04	7888.05	7612.39	7342.67	7086.69	6845.12	6590.23	6231.94	5880.8	5545.14	5214.85	4892.45
								Total	40700.1	40877.2	42824.1	41682.8	45244.9	45699.6	46021.4	47376.9	47155	46759.3	47837.8	47096	46869.2	47513	46510.4	45550.5	43486.1	43578.3	44339.5	40230.4	40466	39509.8	40878.2	40135.1	39016.5	39239.7	39065.9	39100	39683.5	39665.6	38493.2	37525.6	36599.2	35676.6	34791.1	33851.8	33027.1	32204.3	31416.7	30576.1	29763.6

																																																	Final disposal
																																																	Biological treatment
																																																	Incineration
																																																	Use as raw material or fuel
																																																	Energy-derived CO2 emissions


[truncated: 20 more columns]

## Sheet: Details of CO2 frm incineration
	Details of CO2 emittions
	Item			1990	1991	1992	1993	1994	1995	1996	1997	1998	1999	2000	2001	2002	2003	2004	2005	2006	2007	2008	2009	2010	2011	2012	2013	2014	2015	2016	2017	2018	2019	2020	2021	2022	2023	2024	2025	2026	2027	2028	2029	2030	2031	2032	2033	2034	2035
	Municipal waste		Plastics	8606.64	8701.36	8666.91	8649.69	8778.86	8955.38	9304.12	9482.8	9859.53	9960.3	10442.2	10530.3	10283.5	10073.9	9273.75	7557.59	6191.78	5774.88	6529.42	5612.96	4972.63	5419.42	6333.45	6340.03	5456.59	5521.85	5496.05	5850.44	5717.19	5912.8	5671.67	5472.07	5284.16	5094.33	4917.65	4710.92	4522.49	4332.98	4156.24	3951.03	3758.49	3652.46	3577.28	3483.08	3403.95	3325.52
			PET bottles	625.525	632.421	629.913	630.746	640.149	651.957	678.389	689.832	717.78	786.636	938.956	901.189	1106.03	1162.22	1078.13	637.864	472.399	523.389	273.341	333.434	394.779	452.785	440.266	479.099	553.665	526.589	503.617	534.664	653.058	648.799	619.09	597.303	576.792	556.071	536.786	514.22	493.652	472.966	453.674	431.274	410.258	398.684	390.478	380.195	371.558	362.996
			Cardboard	1275.54	1311.19	1320.87	1334.4	1357.95	1375.87	1399.25	1420.91	1430.89	1464.74	1510.77	1542.13	1578.09	1609.43	1582.22	1543.45	1464.14	1446.59	1354.98	1244.94	1286.92	1335.55	1390.04	1344.64	1305.26	1243.65	1226.21	1163.73	1177.77	1191.51	1185.1	1175.9	1169.56	1162.89	1159.07	1148.65	1141.03	1133.19	1128.23	1116.89	1108.43	1099.97	1094.32	1082.49	1073.48	1064.3
			Nappies	331.81	329.37	347.668	374.506	400.123	406.223	434.28	458.678	423.301	424.573	414.981	418.875	449.029	536.02	542.735	539.228	547.367	558.502	572.346	583.918	589.549	601.995	616.169	628.144	640.744	639.188	655.603	666.389	678.799	687.938	701.95	708.798	717.567	726.337	737.12	743.876	753.658	763.392	775.245	782.861	792.596	800.599	810.777	816.525	824.487	832.45
			Textile	1098.79	1147.65	1189.89	1142.63	1175.45	1227.62	1278.38	1347.41	1348.35	1295.18	1092.15	1074.69	1145.15	1184.42	723.432	1367.16	1628.44	1385.36	1752.2	1964.08	1792.78	1572	1380.49	1338.34	1275.98	1449.98	1358.33	1370.08	1202.05	1207.92	1203.4	1195.44	1190.4	1185.04	1182.62	1173.49	1167.35	1161	1157.6	1147.69	1140.75	1133.61	1129.38	1118.8	1111.13	1103.31
	Industrial waste		Waste oil	3690.93	3853.55	4510.1	3943.95	5016.02	4395.47	4139.16	4221.35	4212.3	4210.33	4827.02	4367.4	4391.17	4213.6	4171.35	4378.83	4208.7	4237.32	3762.99	3239.08	4303.65	4135.43	4534.88	3803.8	4165.04	3493.37	4032.26	3816.59	3863.49	3855.04	3821.99	3736.54	3651.1	3562.89	3477.44	3389.24	3303.79	3215.59	3130.14	3044.69	2956.48	2942.47	2928.45	2914.43	2900.41	2886.39
			Waste plastics	2161.92	2056.43	2448.87	2790.5	4055.24	4604.17	4369.81	5298.03	5717.11	5090.14	4568.16	4306.32	4139.7	4609.05	4679.46	4639.56	4477.63	4926.17	5436.2	3825.62	4366.5	3872.88	4181.91	4555.46	4075.86	4677.26	4553.03	4713.9	4777.44	4816.96	4535	4364.51	4185.25	4006.39	3828.1	3650.89	3478.51	3306.48	3135.39	2964.75	2795	2727.87	2667.98	2613.03	2560.43	2508.79
			Cardboard	3.1106	0.809982	0.661555	0.986238	4.45385	6.60227	3.60331	6.82061	8.80875	7.14871	6.66332	6.77353	6.56198	4.2049	3.38425	2.99428	2.98469	1.30435	4.58267	2.76909	2.70879	2.08725	3.23756	1.41005	1.20597	1.05754	1.01116	1.07609	0.955497	0.927667	0.926146	0.977286	1.00924	1.04137	1.0735	1.10567	1.13761	1.16861	1.1996	1.23066	1.26158	1.29257	1.30333	1.31415	1.32484	1.33559
	Specially-controlled industrial waste		Waste oil (fossil-fuel derived)	698.065	698.065	698.065	698.065	751.597	1035.67	1106.98	1444.01	1152.91	1327.18	1525.6	1384	1395.23	1342.38	1332.47	1402.49	1351.63	1364.48	2547.06	1845.23	1143.41	814.704	784.021	796.224	781.616	691.592	816.288	561.44	745.989	748.923	742.502	736.081	729.661	723.24	716.819	710.399	703.978	697.557	691.137	684.716	678.295	672.026	665.758	659.489	653.22	646.952
			Waste oil (specified hazardous industrial waste)	18.8636	18.8636	18.8636	18.8636	20.3102	27.9867	29.9137	39.0211	31.1547	35.864	41.2257	37.3993	37.7028	36.2746	36.0068	37.8991	36.5245	36.872	35.5025	38.8366	42.1708	44.2793	25.3025	54.822	124.404	148.652	130.729	126.512	110.223	110.223	109.278	108.333	107.388	106.443	105.498	104.553	103.608	102.663	101.718	100.773	99.8282	98.9056	97.983	97.0604	96.1378	95.2152
			Infectious waste (plastics)	199.414	199.414	199.414	199.414	176.937	328.196	997.343	319.555	309.428	476.96	428.049	403.514	387.901	431.88	438.477	434.739	419.566	461.595	336.233	365.75	395.267	451.733	336.233	341.367	451.733	426.067	410.667	395.267	479.967	474.833	474.833	453.775	440.39	426.932	413.477	400.003	386.625	373.62	360.617	347.589	334.615	321.617	316.706	311.77	306.888	301.981
	Other		Industrial waste from illegal dumping	5.12995	5.12995	5.12995	5.12995	5.12995	5.12995	5.12995	1.77598	3.83629	2.27171	1.40977	0.620774	0.415338	0.675855	0.440645	0.29029	0.212879	0.192038	0.320063	0.327507	0.139935	0.0818767	0.114627	0.0788993	0.098252	0.0282847	0.071456	0.0818767	0.0818767	0.0818767	0.0818767	0.0818767	0.0818767	0.0818767	0.0818767	0.0818767	0.0818767	0.0818767	0.0818767	0.0818767	0.0818767	0.0818767	0.0818767	0.0818767	0.0818767	0.0818767
	Use as raw material or fuel	Plastics derived from municipal waste	Liquefaction（fossil-fuel derived）	0	0	0	0	0	0	0	0	0	0	9.08632	21.5763	18.4673	15.8071	17.3724	18.8859	11.852	11.4964	7.37121	18.1653	2.85292	0	0	0	0	0	0	0	0	0	0	0	0	0	0	0	0	0	0	0	0	0	0	0	0	0
			Blast furnace reducing agent (fossil-fuel derived)	0	0	0	0	0	0	0	0	0	0	67.9179	115.789	127.13	161.005	151.965	99.396	105.099	88.6711	46.8406	74.5026	72.0811	69.7033	70.2726	82.0739	72.425	82.2518	78.9581	75.8778	76.6097	74.2934	71.6641	69.765	68.0344	66.2603	64.6714	62.6057	60.8006	58.9581	57.2881	55.1585	53.1957	52.4963	52.2368	51.6717	51.3282	50.9882
			Coke oven chemical feedstock (fossil-fuel derived)	0	0	0	0	0	0	0	0	0	0	15.3525	73.0793	129.755	172.585	195.601	246.454	219.372	200.451	199.091	210.641	248.579	237.857	240.671	0	24.344	40.6479	34.6236	44.9972	23.9599	33.7159	32.5226	31.6608	30.8754	30.0703	29.3492	28.4117	27.5925	26.7564	25.9985	25.0321	24.1413	23.8239	23.7061	23.4497	23.2938	23.1395
			Gasification (fossil-fuel derived)	0	0	0	0	0	0	0	0	0	0	1.72481	20.3543	30.2463	75.9023	141.129	158.371	147.331	152.631	126.045	120.354	143.019	138.567	166.072	157.413	136.361	147.874	146.511	153.427	124.355	119.797	115.558	112.495	109.705	106.844	104.282	100.951	98.0402	95.0693	92.3764	88.9425	85.7775	84.6497	84.2313	83.3201	82.7662	82.218
		Waste oil（Fossil-fuel derived）	Other	3591.68	3524.51	4215.13	3457.43	4373.15	4193.13	3935.91	4352.08	4064.18	3843.88	4149.83	4137.39	4369.8	4745.61	4991.07	5214.61	5071.82	5448.53	4804.85	4559.33	4778.34	4732.98	4952.42	4796.31	4591.69	5014.91	4677.84	4679.78	5079.11	5047.16	5001.07	4955.04	4909.05	4863.11	4817.22	4771.38	4725.59	4679.85	4634.15	4588.5	4542.91	4498.37	4453.89	4409.45	4365.06	4320.72
		Waste plastics (Fossil-fuel derived)	Manufacture of iron and steel (feeding the blast furnace)	0	0	0	0	0	0	0	77	77	94.9667	146.23	218.843	245.919	358.978	423.134	410.578	262.025	289	190.099	247.868	344.841	292.985	344.033	275.35	381.673	369.798	400.512	431.468	336.891	382.195	337.207	315.513	292.382	269.663	245.829	225.647	205.365	185.513	164.683	147.189	128.764	131.273	133.106	137.854	141.414	145.04
		Waste plastics (Fossil-fuel derived)	Chemical industry (boiler)	13.6957	11.491	6.9454	14.2707	11.5808	9.9715	9.6635	16.3112	14.3015	12.2404	12.2404	9.20073	13.6352	15.4619	10.7779	5.5902	5.1359	2.90033	4.22217	3.52917	3.37423	2.94246	2.893	1.68332	0.932047	1.14754	0.560327	7.73002	8.89876	9.8898	9.38988	9.0915	8.78904	8.48563	8.18164	7.87807	7.58336	7.28778	6.9917	6.69372	6.3947	6.32486	6.28613	6.25778	6.23423	6.21215
		Waste plastics (Fossil-fuel derived)	Paper industry (boiler)	0	0	0	0	0	0	0	0	0	3.2725	7.27137	4.3967	4.61487	3.64723	3.62413	7.08143	22.1811	36.208	41.7879	44.873	45.6623	41.2022	39.5847	36.4288	44.8908	40.8146	43.7014	46.993	47.3695	46.3726	44.0285	42.6294	41.2112	39.7885	38.3631	36.9397	35.5578	34.1719	32.7836	31.3864	29.9843	29.6568	29.4752	29.3423	29.2319	29.1283
		Waste plastics (Fossil-fuel derived)	Cement manufacturer (firing furnace)	0	0	0	0	0	23.1	33.3667	56.4667	74.4333	154	261.8	438.9	541.567	654.5	726.367	775.133	936.833	1047.2	1116.5	1172.97	1140.98	1202.1	1227.41	1327.18	1524.28	1475.41	1596.25	1647.3	1840.24	1912.43	1815.76	1758.06	1699.57	1640.9	1582.12	1523.41	1466.42	1409.27	1352.01	1294.39	1236.57	1223.06	1215.57	1210.09	1205.54	1201.27
		Waste plastics (Fossil-fuel derived)	Automobile manufacturing (boiler)	40.8958	42.1165	36.9159	29.4843	25.7969	26.1	26.3462	26.6661	27.0302	24.4193	20.2806	16.6787	15.7871	13.8	12.7031	10.2624	9.92026	0	0	0	0	0	0	0	0	0	0	0	0	0	0	0	0	0	0	0	0	0	0	0	0	0	0	0	0	0
		Waste plastics (Fossil-fuel derived)	Other (liquefaction)	0	0	0	0	0	0	0	0	0	0	1.9019	4.1426	6.0445	3.12107	2.16113	1.8865	5.76473	3.62927	7.68203	2.72323	1.57173	2.41702	2.63676	2.45196	2.72321	2.79713	0.286966	0	2.00171	2.00215	1.90095	1.84054	1.77931	1.71789	1.65634	1.59489	1.53522	1.47538	1.41544	1.35512	1.29458	1.28045	1.2726	1.26686	1.2621	1.25763
		Waste plastics (Fossil-fuel derived)	Other (gasification)	0	0	0	0	0	0	0	0	0	0	0	47.9019	35.9	33.1173	35.1637	27.858	66.0887	74.1507	99.1513	235.473	299.091	199.847	203.229	249.569	229.57	208.03	202.547	232.39	249.734	220.309	209.172	202.526	195.788	189.029	182.257	175.495	168.93	162.345	155.75	149.112	142.451	140.895	140.032	139.4	138.876	138.384
		Waste tire		526.861	571.418	630.325	704.837	770.96	845.166	872.744	891.336	850.194	941.742	1044.12	1085.44	986.927	762.206	783.184	869.159	949.372	997.7	1028	950.779	1007.77	975.869	950.65	957.556	1014.27	1037.04	997.068	1036.02	1063.73	973.496	967.374	961.251	955.128	949.006	942.883	936.761	930.638	924.515	918.393	912.27	906.147	900.025	893.902	887.78	881.657	875.534
		RDF		34.3141	34.3141	34.3141	34.3141	34.3141	39.6624	44.5723	63.2474	81.2082	131.637	151.439	179.249	247.123	333.976	392.842	423.462	403.594	405.311	393.908	383.936	388.114	397.046	391.791	393.515	395.067	367.277	365.841	365.178	368.58	367.871	355.137	346.671	339.08	331.302	324.474	315.295	307.444	299.438	292.337	282.957	274.461	271.788	270.977	268.458	267.016	265.572
		RPF boiler (oil refinig)		0	0	0	0	0	0	0	0.125866	0.240668	0.232369	0.615501	0.814674	6.09138	10.0721	8.27538	6.42057	9.96281	5.26564	3.51873	4.64184	5.77141	4.6009	5.53178	4.51393	5.02087	6.08321	4.4652	5.03209	0.310709	0.114497	0.10871	0.105255	0.101754	0.0982409	0.0947215	0.0912069	0.087795	0.0843729	0.0809452	0.0774954	0.0740335	0.0732249	0.0727765	0.0724483	0.0721757	0.07192
		RPF boiler (chemical industry)		0	0	0	0	0	0	0	0	7.18269	10.4082	10.3363	9.41786	9.89781	15.1841	16.242	21.146	27.5352	30.0331	30.5229	34.251	30.8814	36.2637	36.8072	35.3171	28.2846	30.1296	26.2016	24.3711	23.0226	24.1066	22.888	22.1607	21.4235	20.6839	19.9429	19.203	18.4846	17.7641	17.0424	16.3161	15.5872	15.417	15.3226	15.2535	15.1961	15.1422
		RPF boiler (paper industry)		0	0	0	7.15244	9.81037	11.2349	8.855	9.35693	8.60261	13.4664	34.6728	90.6776	143.032	238.109	405.41	642.978	875.317	1030.74	1013.76	1102.52	1110.04	1160.24	1210.88	1278.87	1258.72	1297.97	1399.53	1410.27	1430.22	1398.77	1328.07	1285.86	1243.09	1200.17	1157.18	1114.24	1072.56	1030.75	988.877	946.732	904.44	894.562	889.084	885.074	881.744	878.62
		RPF CementFiring furnace (cement manufacturer)		0	0	0	0	0	0	0	0	0	0	0.371191	0.764685	5.84028	8.31913	7.98936	12.9853	11.8574	10.9302	25.9269	33.5284	24.4743	25.6929	22.036	25.1391	27.235	22.6255	17.4013	21.3412	24.1518	28.3007	26.8701	26.0162	25.1507	24.2825	23.4126	22.5439	21.7005	20.8547	20.0075	19.1548	18.2991	18.0992	17.9884	17.9073	17.8399	17.7767
				22923.2	23138.1	24960	24036.4	27607.8	28168.6	28677.8	30222.8	30419.8	30311.6	31732.4	31447.9	31858.3	32825.5	32186.9	31494.3	29942.4	30551.5	31744.4	28257	28937.9	28223.3	29893.1	29306.8	28569.7	28964.1	29176.2	29382.3	30106.2	30296.8	29404.5	28690.5	27994.5	27293.1	26617.7	25889.9	25204.2	24514.8	23851.5	23138.8	22446.6	22141.4	21907.6	21644.9	21411.6	21180.4
		Summary of CO2 emissions 1
				1990	1991	1992	1993	1994	1995	1996	1997	1998	1999	2000	2001	2002	2003	2004	2005	2006	2007	2008	2009	2010	2011	2012	2013	2014	2015	2016	2017	2018	2019	2020	2021	2022	2023	2024	2025	2026	2027	2028	2029	2030	2031	2032	2033	2034	2035
		Municipal waste	Plastics and PET bottles	9232.16	9333.78	9296.83	9280.44	9419	9607.34	9982.51	10172.6	10577.3	10746.9	11475.2	11662.3	11695.1	11661.4	10857.9	8718.56	7147.83	6751.52	7182.11	6370.06	5833.94	6318.33	7250.74	7058.62	6243.39	6319.21	6259.76	6659.41	6595.18	6789.41	6510.5	6283.29	6069.56	5853.57	5652.74	5417.11	5202.58	4986.73	4785.58	4551.44	4331.87	4212.12	4127.94	4021.72	3932.89	3844.86
			Paper/ cardboard	1275.54	1311.19	1320.87	1334.4	1357.95	1375.87	1399.25	1420.91	1430.89	1464.74	1510.77	1542.13	1578.09	1609.43	1582.22	1543.45	1464.14	1446.59	1354.98	1244.94	1286.92	1335.55	1390.04	1344.64	1305.26	1243.65	1226.21	1163.73	1177.77	1191.51	1185.1	1175.9	1169.56	1162.89	1159.07	1148.65	1141.03	1133.19	1128.23	1116.89	1108.43	1099.97	1094.32	1082.49	1073.48	1064.3
			Nappies	331.81	329.37	347.668	374.506	400.123	406.223	434.28	458.678	423.301	424.573	414.981	418.875	449.029	536.02	542.735	539.228	547.367	558.502	572.346	583.918	589.549	601.995	616.169	628.144	640.744	639.188	655.603	666.389	678.799	687.938	701.95	708.798	717.567	726.337	737.12	743.876	753.658	763.392	775.245	782.861	792.596	800.599	810.777	816.525	824.487	832.45
			Textile	1098.79	1147.65	1189.89	1142.63	1175.45	1227.62	1278.38	1347.41	1348.35	1295.18	1092.15	1074.69	1145.15	1184.42	723.432	1367.16	1628.44	1385.36	1752.2	1964.08	1792.78	1572	1380.49	1338.34	1275.98	1449.98	1358.33	1370.08	1202.05	1207.92	1203.4	1195.44	1190.4	1185.04	1182.62	1173.49	1167.35	1161	1157.6	1147.69	1140.75	1133.61	1129.38	1118.8	1111.13	1103.31
		Industrial waste	Waste oil	7282.61	7378.07	8725.23	7401.38	9389.17	8588.6	8075.07	8573.44	8276.48	8054.21	8976.85	8504.8	8760.97	8959.21	9162.42	9593.44	9280.52	9685.85	8567.84	7798.42	9081.99	8868.42	9487.31	8600.11	8756.72	8508.28	8710.1	8496.37	8942.6	8902.2	8823.06	8691.58	8560.15	8426	8294.67	8160.62	8029.38	7895.43	7764.29	7633.19	7499.39	7440.84	7382.34	7323.88	7265.47	7207.11
			Waste plastics	2216.51	2110.04	2492.73	2834.25	4092.62	4663.34	4439.19	5474.48	5909.87	5379.04	5017.88	5046.38	5003.17	5691.68	5893.39	5877.95	5785.58	6379.26	6895.64	5533.05	6202.02	5614.38	6001.7	6448.13	6259.93	6775.26	6796.88	7079.78	7262.57	7390.16	6952.45	6694.17	6424.77	6155.98	5886.51	5621.85	5363.91	5106.54	4849.03	4594.87	4340.45	4260.36	4193.72	4137.24	4082.98	4030.08
		Specially-controlled industrial waste	Waste oil	716.928	716.928	716.928	716.928	771.908	1063.66	1136.9	1483.03	1184.06	1363.05	1566.82	1421.39	1432.93	1378.65	1368.47	1440.39	1388.15	1401.36	2582.56	1884.07	1185.58	858.983	809.324	851.046	906.02	840.244	947.017	687.952	856.212	859.145	851.78	844.414	837.048	829.683	822.317	814.952	807.586	800.22	792.855	785.489	778.123	770.932	763.741	756.549	749.358	742.167
			Waste plastics	199.414	199.414	199.414	199.414	176.937	328.196	997.343	319.555	309.428	476.96	428.049	403.514	387.901	431.88	438.477	434.739	419.566	461.595	336.233	365.75	395.267	451.733	336.233	341.367	451.733	426.067	410.667	395.267	479.967	474.833	474.833	453.775	440.39	426.932	413.477	400.003	386.625	373.62	360.617	347.589	334.615	321.617	316.706	311.77	306.888	301.981
			RDF	34.3141	34.3141	34.3141	34.3141	34.3141	39.6624	44.5723	63.2474	81.2082	131.637	151.439	179.249	247.123	333.976	392.842	423.462	403.594	405.311	393.908	383.936	388.114	397.046	391.791	393.515	395.067	367.277	365.841	365.178	368.58	367.871	355.137	346.671	339.08	331.302	324.474	315.295	307.444	299.438	292.337	282.957	274.461	271.788	270.977	268.458	267.016	265.572
			RPF	0	0	0	7.15244	9.81037	11.2349	8.855	9.48279	16.026	24.107	45.9958	101.675	164.862	271.684	437.916	683.53	924.672	1076.97	1073.73	1174.94	1171.17	1226.79	1275.26	1343.84	1319.26	1356.81	1447.6	1461.02	1477.71	1451.29	1377.93	1334.15	1289.76	1245.24	1200.63	1156.08	1112.83	1069.46	1026.01	982.281	938.401	928.151	922.468	918.307	914.852	911.611
			Waste tire	526.861	571.418	630.325	704.837	770.96	845.166	872.744	891.336	850.194	941.742	1044.12	1085.44	986.927	762.206	783.184	869.159	949.372	997.7	1028	950.779	1007.77	975.869	950.65	957.556	1014.27	1037.04	997.068	1036.02	1063.73	973.496	967.374	961.251	955.128	949.006	942.883	936.761	930.638	924.515	918.393	912.27	906.147	900.025	893.902	887.78	881.657	875.534
		Other		8.24054	5.93993	5.7915	6.11618	9.5838	11.7322	8.73325	8.59659	12.645	9.42041	8.07309	7.3943	6.97732	4.88075	3.8249	3.28457	3.19757	1.49639	4.90274	3.09659	2.84872	2.16913	3.35218	1.48895	1.30422	1.08582	1.08261	1.15797	1.03737	1.00954	1.00802	1.05916	1.09111	1.12325	1.15537	1.18755	1.21948	1.25048	1.28148	1.31254	1.34346	1.37445	1.38521	1.39603	1.40672	1.41747
		Total		22923.2	23138.1	24960	24036.4	27607.8	28168.6	28677.8	30222.8	30419.8	30311.6	31732.4	31447.9	31858.3	32825.5	32186.9	31494.3	29942.4	30551.5	31744.4	28257	28937.9	28223.3	29893.1	29306.8	28569.7	28964.1	29176.2	29382.3	30106.2	30296.8	29404.5	28690.5	27994.5	27293.1	26617.7	25889.9	25204.2	24514.8	23851.5	23138.8	22446.6	22141.4	21907.6	21644.9	21411.6	21180.4
			Summary of CO2 emissions 2
				1990	1991	1992	1993	1994	1995	1996	1997	1998	1999	2000	2001	2002	2003	2004	2005	2006	2007	2008	2009	2010	2011	2012	2013	2014	2015	2016	2017	2018	2019	2020	2021	2022	2023	2024	2025	2026	2027	2028	2029	2030	2031	2032	2033	2034	2035
			Plastics	11648.1	11643.2	11989	12314.1	13688.6	14598.9	15419	15966.7	16796.6	16602.9	16921.2	17112.2	17086.2	17785	17189.8	15031.2	13353	13592.4	14414	12268.9	12431.2	12384.4	13588.7	13848.1	12955.1	13520.5	13467.3	14134.5	14337.7	14654.4	13937.8	13431.2	12934.7	12436.5	11952.7	11439	10953.1	10466.9	9995.22	9493.9	9006.94	8794.09	8638.36	8470.73	8322.77	8176.92
			Waste oil	7999.54	8095	9442.15	8118.31	10161.1	9652.26	9211.97	10056.5	9460.54	9417.26	10543.7	9926.19	10193.9	10337.9	10530.9	11033.8	10668.7	11087.2	11150.4	9682.49	10267.6	9727.4	10296.6	9451.15	9662.74	9348.53	9657.12	9184.32	9798.81	9761.34	9674.84	9535.99	9397.19	9255.69	9116.98	8975.57	8836.97	8695.65	8557.14	8418.68	8277.51	8211.77	8146.08	8080.43	8014.83	7949.28
			Paper/ cardboard	1275.54	1311.19	1320.87	1334.4	1357.95	1375.87	1399.25	1420.91	1430.89	1464.74	1510.77	1542.13	1578.09	1609.43	1582.22	1543.45	1464.14	1446.59	1354.98	1244.94	1286.92	1335.55	1390.04	1344.64	1305.26	1243.65	1226.21	1163.73	1177.77	1191.51	1185.1	1175.9	1169.56	1162.89	1159.07	1148.65	1141.03	1133.19	1128.23	1116.89	1108.43	1099.97	1094.32	1082.49	1073.48	1064.3
			Nappies	331.81	329.37	347.668	374.506	400.123	406.223	434.28	458.678	423.301	424.573	414.981	418.875	449.029	536.02	542.735	539.228	547.367	558.502	572.346	583.918	589.549	601.995	616.169	628.144	640.744	639.188	655.603	666.389	678.799	687.938	701.95	708.798	717.567	726.337	737.12	743.876	753.658	763.392	775.245	782.861	792.596	800.599	810.777	816.525	824.487	832.45
			Textile	1098.79	1147.65	1189.89	1142.63	1175.45	1227.62	1278.38	1347.41	1348.35	1295.18	1092.15	1074.69	1145.15	1184.42	723.432	1367.16	1628.44	1385.36	1752.2	1964.08	1792.78	1572	1380.49	1338.34	1275.98	1449.98	1358.33	1370.08	1202.05	1207.92	1203.4	1195.44	1190.4	1185.04	1182.62	1173.49	1167.35	1161	1157.6	1147.69	1140.75	1133.61	1129.38	1118.8	1111.13	1103.31
			RDF and RPF	34.3141	34.3141	34.3141	41.4665	44.1245	50.8972	53.4273	72.7302	97.2342	155.744	197.435	280.924	411.984	605.66	830.759	1106.99	1328.27	1482.28	1467.64	1558.88	1559.28	1623.84	1667.05	1737.35	1714.33	1724.08	1813.44	1826.2	1846.29	1819.17	1733.07	1680.82	1628.84	1576.54	1525.1	1471.37	1420.28	1368.89	1318.35	1265.24	1212.86	1199.94	1193.45	1186.77	1181.87	1177.18
			Waste tire	526.861	571.418	630.325	704.837	770.96	845.166	872.744	891.336	850.194	941.742	1044.12	1085.44	986.927	762.206	783.184	869.159	949.372	997.7	1028	950.779	1007.77	975.869	950.65	957.556	1014.27	1037.04	997.068	1036.02	1063.73	973.496	967.374	961.251	955.128	949.006	942.883	936.761	930.638	924.515	918.393	912.27	906.147	900.025	893.902	887.78	881.657	875.534
			Other	8.24054	5.93993	5.7915	6.11618	9.5838	11.7322	8.73325	8.59659	12.645	9.42041	8.07309	7.3943	6.97732	4.88075	3.8249	3.28457	3.19757	1.49639	4.90274	3.09659	2.84872	2.16913	3.35218	1.48895	1.30422	1.08582	1.08261	1.15797	1.03737	1.00954	1.00802	1.05916	1.09111	1.12325	1.15537	1.18755	1.21948	1.25048	1.28148	1.31254	1.34346	1.37445	1.38521	1.39603	1.40672	1.41747
			Total	22923.2	23138.1	24960	24036.4	27607.8	28168.6	28677.8	30222.8	30419.8	30311.6	31732.4	31447.9	31858.3	32825.5	32186.9	31494.3	29942.4	30551.5	31744.4	28257	28937.9	28223.3	29893.1	29306.8	28569.7	28964.1	29176.2	29382.3	30106.2	30296.8	29404.5	28690.5	27994.5	27293.1	26617.7	25889.9	25204.2	24514.8	23851.5	23138.8	22446.6	22141.4	21907.6	21644.9	21411.6	21180.4
		Summary of CO2 emissions from plastics
				1990	1991	1992	1993	1994	1995	1996	1997	1998	1999	2000	2001	2002	2003	2004	2005	2006	2007	2008	2009	2010	2011	2012	2013	2014	2015	2016	2017	2018	2019	2020	2021	2022	2023	2024	2025	2026	2027	2028	2029	2030	2031	2032	2033	2034	2035
		Municipal waste	MS incineration (incl. heat recovery)	9232.16	9333.78	9296.83	9280.44	9419	9607.34	9982.51	10172.6	10577.3	10746.9	11381.2	11431.5	11389.5	11236.1	10351.9	8195.45	6664.18	6298.27	6802.76	5946.4	5367.41	5872.21	6773.72	6819.13	6010.26	6048.44	5999.67	6385.1	6370.25	6561.6	6290.76	6069.37	5860.95	5650.4	5454.44	5225.14	5016.14	4805.94	4609.92	4382.3	4168.75	4051.15	3967.76	3863.28	3775.51	3688.51
			MS liquefaction	0	0	0	0	0	0	0	0	0	0	9.08632	21.5763	18.4673	15.8071	17.3724	18.8859	11.852	11.4964	7.37121	18.1653	2.85292	0	0	0	0	0	0	0	0	0	0	0	0	0	0	0	0	0	0	0	0	0	0	0	0	0
			MS blast furnace reducing agent	0	0	0	0	0	0	0	0	0	0	67.9179	115.789	127.13	161.005	151.965	99.396	105.099	88.6711	46.8406	74.5026	72.0811	69.7033	70.2726	82.0739	72.425	82.2518	78.9581	75.8778	76.6097	74.2934	71.6641	69.765	68.0344	66.2603	64.6714	62.6057	60.8006	58.9581	57.2881	55.1585	53.1957	52.4963	52.2368	51.6717	51.3282	50.9882
			MS coke oven chemical feedstock	0	0	0	0	0	0	0	0	0	0	15.3525	73.0793	129.755	172.585	195.601	246.454	219.372	200.451	199.091	210.641	248.579	237.857	240.671	0	24.344	40.6479	34.6236	44.9972	23.9599	33.7159	32.5226	31.6608	30.8754	30.0703	29.3492	28.4117	27.5925	26.7564	25.9985	25.0321	24.1413	23.8239	23.7061	23.4497	23.2938	23.1395
			MS gasification	0	0	0	0	0	0	0	0	0	0	1.72481	20.3543	30.2463	75.9023	141.129	158.371	147.331	152.631	126.045	120.354	143.019	138.567	166.072	157.413	136.361	147.874	146.511	153.427	124.355	119.797	115.558	112.495	109.705	106.844	104.282	100.951	98.0402	95.0693	92.3764	88.9425	85.7775	84.6497	84.2313	83.3201	82.7662	82.218
		Industrial waste	IW incineration (incl. heat recovery)	2161.92	2056.43	2448.87	2790.5	4055.24	4604.17	4369.81	5298.03	5717.11	5090.14	4568.16	4306.32	4139.7	4609.05	4679.46	4639.56	4477.63	4926.17	5436.2	3825.62	4366.5	3872.88	4181.91	4555.46	4075.86	4677.26	4553.03	4713.9	4777.44	4816.96	4535	4364.51	4185.25	4006.39	3828.1	3650.89	3478.51	3306.48	3135.39	2964.75	2795	2727.87	2667.98	2613.03	2560.43	2508.79
			IW manufacture of iron and steel (blast furnace)	0	0	0	0	0	0	0	77	77	94.9667	146.23	218.843	245.919	358.978	423.134	410.578	262.025	289	190.099	247.868	344.841	292.985	344.033	275.35	381.673	369.798	400.512	431.468	336.891	382.195	337.207	315.513	292.382	269.663	245.829	225.647	205.365	185.513	164.683	147.189	128.764	131.273	133.106	137.854	141.414	145.04
			IW chemical industry (boiler)	13.6957	11.491	6.9454	14.2707	11.5808	9.9715	9.6635	16.3112	14.3015	12.2404	12.2404	9.20073	13.6352	15.4619	10.7779	5.5902	5.1359	2.90033	4.22217	3.52917	3.37423	2.94246	2.893	1.68332	0.932047	1.14754	0.560327	7.73002	8.89876	9.8898	9.38988	9.0915	8.78904	8.48563	8.18164	7.87807	7.58336	7.28778	6.9917	6.69372	6.3947	6.32486	6.28613	6.25778	6.23423	6.21215
			IW paper industry (boiler)	0	0	0	0	0	0	0	0	0	3.2725	7.27137	4.3967	4.61487	3.64723	3.62413	7.08143	22.1811	36.208	41.7879	44.873	45.6623	41.2022	39.5847	36.4288	44.8908	40.8146	43.7014	46.993	47.3695	46.3726	44.0285	42.6294	41.2112	39.7885	38.3631	36.9397	35.5578	34.1719	32.7836	31.3864	29.9843	29.6568	29.4752	29.3423	29.2319	29.1283
			IW cement manufacturer (firing furnace)	0	0	0	0	0	23.1	33.3667	56.4667	74.4333	154	261.8	438.9	541.567	654.5	726.367	775.133	936.833	1047.2	1116.5	1172.97	1140.98	1202.1	1227.41	1327.18	1524.28	1475.41	1596.25	1647.3	1840.24	1912.43	1815.76	1758.06	1699.57	1640.9	1582.12	1523.41	1466.42	1409.27	1352.01	1294.39	1236.57	1223.06	1215.57	1210.09	1205.54	1201.27
			IW automobile manufacturing (boiler)	40.8958	42.1165	36.9159	29.4843	25.7969	26.1	26.3462	26.6661	27.0302	24.4193	20.2806	16.6787	15.7871	13.8	12.7031	10.2624	9.92026	0	0	0	0	0	0	0	0	0	0	0	0	0	0	0	0	0	0	0	0	0	0	0	0	0	0	0	0	0
			IW liquefaction	0	0	0	0	0	0	0	0	0	0	1.9019	4.1426	6.0445	3.12107	2.16113	1.8865	5.76473	3.62927	7.68203	2.72323	1.57173	2.41702	2.63676	2.45196	2.72321	2.79713	0.286966	0	2.00171	2.00215	1.90095	1.84054	1.77931	1.71789	1.65634	1.59489	1.53522	1.47538	1.41544	1.35512	1.29458	1.28045	1.2726	1.26686	1.2621	1.25763
			IW gasification	0	0	0	0	0	0	0	0	0	0	0	47.9019	35.9	33.1173	35.1637	27.858	66.0887	74.1507	99.1513	235.473	299.091	199.847	203.229	249.569	229.57	208.03	202.547	232.39	249.734	220.309	209.172	202.526	195.788	189.029	182.257	175.495	168.93	162.345	155.75	149.112	142.451	140.895	140.032	139.4	138.876	138.384
			Infectious waste plastics	199.414	199.414	199.414	199.414	176.937	328.196	997.343	319.555	309.428	476.96	428.049	403.514	387.901	431.88	438.477	434.739	419.566	461.595	336.233	365.75	395.267	451.733	336.233	341.367	451.733	426.067	410.667	395.267	479.967	474.833	474.833	453.775	440.39	426.932	413.477	400.003	386.625	373.62	360.617	347.589	334.615	321.617	316.706	311.77	306.888	301.981
		Total		11648.1	11643.2	11989	12314.1	13688.6	14598.9	15419	15966.7	16796.6	16602.9	16921.2	17112.2	17086.2	17785	17189.8	15031.2	13353	13592.4	14414	12268.9	12431.2	12384.4	13588.7	13848.1	12955.1	13520.5	13467.3	14134.5	14337.7	14654.4	13937.8	13431.2	12934.7	12436.5	11952.7	11439	10953.1	10466.9	9995.22	9493.9	9006.94	8794.09	8638.36	8470.73	8322.77	8176.92
																																Municipal waste	6789.41	0.463302
																																Industrial waste	7390.16	0.504296
																																Specially-controlled	474.833	0.0324021
																																	2573.2	0.348192
				1990	1991	1992	1993	1994	1995	1996	1997	1998	1999	2000	2001	2002	2003	2004	2005	2006	2007	2008	2009	2010	2011	2012	2013	2014	2015	2016	2017	2018	2019	2020	2021	2022	2023	2024	2025	2026	2027	2028	2029	2030	2031	2032	2033	2034	2035
			Incineration (incl. heat recovery)	3690.93	3853.55	4510.1	3943.95	5016.02	4395.47	4139.16	4221.35	4212.3	4210.33	4827.02	4367.4	4391.17	4213.6	4171.35	4378.83	4208.7	4237.32	3762.99	3239.08	4303.65	4135.43	4534.88	3803.8	4165.04	3493.37	4032.26	3816.59	3863.49	3855.04	3821.99	3736.54	3651.1	3562.89	3477.44	3389.24	3303.79	3215.59	3130.14	3044.69	2956.48	2942.47	2928.45	2914.43	2900.41	2886.39
			Fuel use	3591.68	3524.51	4215.13	3457.43	4373.15	4193.13	3935.91	4352.08	4064.18	3843.88	4149.83	4137.39	4369.8	4745.61	4991.07	5214.61	5071.82	5448.53	4804.85	4559.33	4778.34	4732.98	4952.42	4796.31	4591.69	5014.91	4677.84	4679.78	5079.11	5047.16	5001.07	4955.04	4909.05	4863.11	4817.22	4771.38	4725.59	4679.85	4634.15	4588.5	4542.91	4498.37	4453.89	4409.45	4365.06	4320.72
			Incineration of waste oil from specially-controlled industrial waste	716.928	716.928	716.928	716.928	771.908	1063.66	1136.9	1483.03	1184.06	1363.05	1566.82	1421.39	1432.93	1378.65	1368.47	1440.39	1388.15	1401.36	2582.56	1884.07	1185.58	858.983	809.324	851.046	906.02	840.244	947.017	687.952	856.212	859.145	851.78	844.414	837.048	829.683	822.317	814.952	807.586	800.22	792.855	785.489	778.123	770.932	763.741	756.549	749.358	742.167
[truncated: 15 more columns]

## Sheet: 5-Summary
	5. Waste sector
		Summary
		By Category
				Category		Unit	1990	1991	1992	1993	1994	1995	1996	1997	1998	1999	2000	2001	2002	2003	2004	2005	2006	2007	2008	2009	2010	2011	2012	2013	2014	2015	2016	2017	2018	2019	2020	2021	2022	2023	2024	2025	2026	2027	2028	2029	2030	2031	2032
				Waste sector (incl. energy recovery, etc.)	Total	kt CO2 eq.	40700.1	40877.2	42824.1	41682.8	45244.9	45699.6	46021.4	47376.9	47155	46759.3	47837.8	47096	46869.2	47513	46510.4	45550.5	43486.1	43578.3	44339.5	40230.4	40466	39509.8	40878.2	40135.1	39016.5	39239.7	39065.9	39100	39683.5	39665.6	38493.2	37525.6	36599.2	35676.6	34791.1	33851.8	33027.1	32204.3	31416.7	30576.1	29763.6	29358.9	29032.4
				1.A Fuel combustion	Total	kt CO2 eq.	11115.2	11302.1	12076.7	11368.5	12449.1	12744	12829.1	13820.9	14033.9	14176.5	15511.3	16434.8	17256.6	18191.3	18040.8	17792.6	17027.1	17419.8	17605.4	16515.9	16902.8	16943	18056.1	17581.5	17329.8	17766.4	18577.9	19139.5	18985.9	19298.5	19128.4	19085.4	19029.6	18946.3	18857.4	18700.9	18552.1	18377.4	18199.5	17951.7	17700.3	17715.4	17780.4
				5.Waste	Total	kt CO2 eq.	29584.9	29575.1	30747.4	30314.3	32795.7	32955.6	33192.2	33556	33121.1	32582.8	32326.5	30661.3	29612.6	29321.7	28469.6	27757.8	26458.9	26158.5	26734.1	23714.6	23563.2	22566.8	22822.1	22553.7	21686.7	21473.3	20488	19960.6	20697.7	20367.1	19364.8	18440.3	17569.6	16730.3	15933.7	15150.9	14475	13827	13217.2	12624.4	12063.3	11643.5	11251.9
				5.A. Solid waste disposal saites	Total	kt CO2 eq.	9604.77	9534.84	9527.06	9378.82	9266.67	9024.42	8789.9	8516.8	8199.56	7896.55	7612.49	7334.49	7049.57	6754.26	6435.68	6129.96	5814.52	5519.2	5177.08	4869.77	4553.2	4301.99	4086.58	3881.36	3658.83	3466.58	3267.11	3111.95	2949.43	2810.8	2681.84	2560.16	2445.56	2336.84	2233.29	2134.3	2039.35	1951.02	1868.52	1791.18	1718.39	1649.65	1584.52
				5.B. Biological Treatment of Solid Waste	Total	kt CO2 eq.	234.765	232.192	232.693	233.245	232.089	232.615	233.199	234.294	233.071	234.027	235.252	237.407	301.188	354.075	365.533	414.408	427.815	413.161	464.43	460.357	401.803	444.244	439.758	434.879	433.035	441.322	446.386	387.827	384.504	383.48	383.581	383.383	383.159	382.918	382.715	382.417	382.158	381.895	381.671	381.354	381.078	380.875	380.708
				5.C Incineration and open burning of waste	Total	kt CO2 eq.	13713.8	13794	14975.6	14763.3	17420.2	17842	18395	19033.5	19032.4	18861.8	18965.9	17681.4	16992.7	17034.7	16527.3	16146.9	15242.3	15297.8	16259.1	13779.3	14012.5	13259.6	13842.8	13739.5	13153	13163.7	12413.9	12183.8	13065.6	12976.2	12135.6	11376.2	10644.2	9935.89	9263.01	8606.23	8050.01	7515.72	7011.52	6525.73	6064.67	5736.86	5431.28
				5.D. Wastewater treatment and discharge	Total	kt CO2 eq.	5328.66	5327.56	5313.15	5258.14	5174.89	5188.7	5133.66	5116.19	5047.04	4937.81	4856.92	4777.42	4692.19	4662.12	4634.4	4559.75	4451.96	4367.1	4303.04	4091.46	4068.83	4036.86	3924.91	3893.25	3824.81	3776.79	3741.8	3640.38	3624.74	3614.8	3584.05	3544.68	3523.25	3503.81	3485.01	3462.67	3441.15	3419.06	3397.87	3373.31	3349.65	3330.04	3311.38
				5.E.- Other (Decomposition of petroleum-derived surfactants）	Total	kt CO2 eq.	702.83	686.446	698.898	680.745	701.913	667.829	640.468	655.231	609.119	652.575	655.914	630.53	577.046	516.527	506.699	506.814	522.36	561.198	530.412	513.688	526.914	524.125	528.103	604.69	617.028	624.931	618.832	636.622	673.375	581.881	579.703	575.865	573.439	570.857	569.693	565.292	562.335	559.275	557.64	552.865	549.52	546.084	544.046
		By gas
			CO2
				Category		Unit	1990	1991	1992	1993	1994	1995	1996	1997	1998	1999	2000	2001	2002	2003	2004	2005	2006	2007	2008	2009	2010	2011	2012	2013	2014	2015	2016	2017	2018	2019	2020	2021	2022	2023	2024	2025	2026	2027	2028	2029	2030	2031	2032
				Waste sector (incl. energy recovery, etc.)	Total	kt CO2 eq.	23626	23824.6	25658.9	24717.1	28309.7	28836.5	29318.3	30878	31028.9	30964.2	32388.3	32078.4	32435.3	33342	32693.6	32001.2	30464.8	31112.7	32274.9	28770.7	29464.9	28747.4	30421.2	29911.5	29186.7	29589	29795	30019	30779.6	30878.7	29984.2	29266.4	28568	27864	27187.4	26455.2	25766.6	25074.1	24409.1	23691.7	22996.1	22687.5	22451.7
				1.A Fuel combustion	Total	kt CO2 eq.	10675.2	10849.6	11623.3	10912.8	11986.7	12263.6	12341.3	13314.1	13515.2	13648.6	14942.9	15869.1	16800.5	17719.8	17577.1	17328.4	16559.8	16964	17127.2	16060.1	16451.6	16492.6	17584.8	17114.3	16849.8	17308.7	18083.3	18632	18504	18811.7	18639	18593	18533.7	18447.1	18354.3	18195.8	18044.3	17867	17685.9	17436.8	17183.5	17194.8	17255.3
				5.Waste	Total	kt CO2 eq.	12950.8	12975	14035.6	13804.3	16323.1	16572.9	16977	17564	17513.7	17315.6	17445.4	16209.2	15634.8	15622.2	15116.5	14672.7	13905	14148.8	15147.6	12710.6	13013.2	12254.8	12836.4	12797.1	12336.9	12280.3	11711.7	11387	12275.5	12067	11345.3	10673.4	10034.3	9416.87	8833.04	8259.38	7722.32	7207.09	6723.25	6254.89	5812.57	5492.67	5196.35
				5.C Incineration and open burning of waste	Total	kt CO2 eq.	12248	12288.6	13336.7	13123.5	15621.2	15905.1	16336.6	16908.7	16904.5	16663	16789.5	15578.7	15057.7	15105.7	14609.8	14165.9	13382.7	13587.6	14617.2	12196.9	12486.3	11730.7	12308.3	12192.5	11719.8	11655.4	11092.8	10750.3	11602.2	11485.1	10765.5	10097.5	9460.83	8846.02	8263.35	7694.09	7159.98	6647.82	6165.61	5702.03	5263.05	4946.58	4652.31
				5.C.1. Waste incineration		kt CO2 eq.	12242.9	12283.4	13331.5	13118.4	15616	15899.9	16331.4	16907	16900.7	16660.7	16788.1	15578.1	15057.3	15105	14609.4	14165.6	13382.5	13587.4	14616.9	12196.6	12486.2	11730.6	12308.1	12192.4	11719.7	11655.4	11092.8	10750.3	11602.1	11485	10765.5	10097.4	9460.75	8845.93	8263.27	7694.01	7159.9	6647.74	6165.52	5701.95	5262.97	4946.5	4652.23
				5.C.2. Open burning		kt CO2 eq.	5.12995	5.12995	5.12995	5.12995	5.12995	5.12995	5.12995	1.77598	3.83629	2.27171	1.40977	0.620774	0.415338	0.675855	0.440645	0.29029	0.212879	0.192038	0.320063	0.327507	0.139935	0.0818767	0.114627	0.0788993	0.098252	0.0282847	0.071456	0.0818767	0.0818767	0.0818767	0.0818767	0.0818767	0.0818767	0.0818767	0.0818767	0.0818767	0.0818767	0.0818767	0.0818767	0.0818767	0.0818767	0.0818767	0.0818767
				5.E.- Other (Decomposition of petroleum-derived surfactants）		kt CO2 eq.	702.83	686.446	698.898	680.745	701.913	667.829	640.468	655.231	609.119	652.575	655.914	630.53	577.046	516.527	506.699	506.814	522.36	561.198	530.412	513.688	526.914	524.125	528.103	604.69	617.028	624.931	618.832	636.622	673.375	581.881	579.703	575.865	573.439	570.857	569.693	565.292	562.335	559.275	557.64	552.865	549.52	546.084	544.046
			CH4
				Category		Unit	1990	1991	1992	1993	1994	1995	1996	1997	1998	1999	2000	2001	2002	2003	2004	2005	2006	2007	2008	2009	2010	2011	2012	2013	2014	2015	2016	2017	2018	2019	2020	2021	2022	2023	2024	2025	2026	2027	2028	2029	2030	2031	2032
				Waste sector (incl. energy recovery, etc.)	Total	kt CO2 eq.	12686.7	12591.9	12561.1	12361.6	12191	11917.3	11644.7	11332.4	10958.5	10626.3	10317.6	9954.54	9612.97	9295.63	8936.28	8603.98	8225.94	7870.71	7508.46	7101.22	6725.51	6442.77	6176.66	5933.97	5690.36	5463.06	5227.48	5001.56	4815.5	4658.89	4526.79	4382.49	4261.55	4148.62	4041.47	3936.56	3836.38	3742.54	3655.27	3570.91	3491.84	3413.71	3339.94
				1.A Fuel combustion		kt CO2 eq.	58.6269	59.1625	59.1559	59.259	59.4177	59.9536	60.018	60.2811	56.9136	60.8008	74.3676	58.4285	50.4592	72.5588	76.7393	81.4646	86.1619	91.9692	110.462	115.294	114.482	119.661	122.029	129.236	142.009	135.003	133.761	141.511	138.055	139.286	139.023	138.904	138.788	138.668	138.553	138.421	138.302	138.18	138.064	137.928	137.798	137.835	137.877
				5.Waste	Total	kt CO2 eq.	12628.1	12532.8	12501.9	12302.3	12131.6	11857.4	11584.7	11272.1	10901.5	10565.5	10243.3	9896.11	9562.51	9223.07	8859.54	8522.52	8139.78	7778.74	7397.99	6985.92	6611.03	6323.11	6054.63	5804.73	5548.36	5328.06	5093.72	4860.05	4677.45	4519.6	4387.76	4243.58	4122.76	4009.96	3902.91	3798.14	3698.08	3604.36	3517.21	3432.99	3354.04	3275.88	3202.07
				5.A. Solid waste disposal saites	Total	kt CO2 eq.	9604.77	9534.84	9527.06	9378.82	9266.67	9024.42	8789.9	8516.8	8199.56	7896.55	7612.49	7334.49	7049.57	6754.26	6435.68	6129.96	5814.52	5519.2	5177.08	4869.77	4553.2	4301.99	4086.58	3881.36	3658.83	3466.58	3267.11	3111.95	2949.43	2810.8	2681.84	2560.16	2445.56	2336.84	2233.29	2134.3	2039.35	1951.02	1868.52	1791.18	1718.39	1649.65	1584.52
				5.A.1. Managed waste disposal saites		kt CO2 eq.	9596.08	9522.82	9513.7	9364.98	9246.23	9003.56	8765.71	8488.49	8164.18	7847.31	7551.15	7263.92	6976.78	6680.91	6374.62	6068.73	5753.55	5459.08	5119.89	4814.43	4497.88	4247.45	4032.19	3830.03	3610.91	3420.67	3220.75	3067.15	2910.3	2772.47	2643.51	2521.84	2407.24	2298.51	2194.96	2095.98	2001.03	1912.69	1830.2	1752.85	1680.07	1611.33	1546.2
				5.A.2. Unmanaged waste disposal sites		kt CO2 eq.	NO	NO	NO	NO	NO	NO	NO	NO	NO	NO	NO	NO	NO	NO	NO	NO	NO	NO	NO	NO	NO	NO	NO	NO	NO	NO	NO	NO	NO	NO	NO	NO	NO	NO	NO	NO	NO	NO	NO	NO	NO	NO	NO
				5.A.3. Uncategorized waste disposal sites		kt CO2 eq.	8.68919	12.0251	13.359	13.8347	20.4373	20.8584	24.1845	28.3121	35.3761	49.2366	61.3447	70.5717	72.7876	73.351	61.06	61.2243	60.9726	60.1149	57.1937	55.3338	55.3223	54.542	54.3932	51.3309	47.9203	45.9137	46.3557	44.8025	39.1335	38.3259	38.3259	38.3259	38.3259	38.3259	38.3259	38.3259	38.3259	38.3259	38.3259	38.3259	38.3259	38.3259	38.3259
				5.B. Biological Treatment of Solid Waste	Total	kt CO2 eq.	53.9924	53.3821	53.4977	53.6275	53.3535	53.475	53.6091	53.863	53.5874	53.7983	54.0759	54.5698	69.2238	81.3815	84.02	95.4315	98.5169	95.1604	106.951	106.06	92.632	102.339	101.299	100.211	99.8906	101.795	103.122	89.6615	88.8943	88.6576	88.6788	88.6295	88.5758	88.5179	88.4703	88.3976	88.3353	88.2719	88.2189	88.1417	88.075	88.0251	87.985
				5.B.1.: Composting		kt CO2 eq.	53.9924	53.3821	53.4977	53.6275	53.3535	53.475	53.6091	53.863	53.5874	53.7983	54.0759	54.5698	69.2238	81.3815	84.02	95.4315	98.5169	95.1604	106.951	106.06	92.632	102.339	101.299	100.211	99.8906	101.795	103.122	89.6615	88.8943	88.6576	88.6788	88.6295	88.5758	88.5179	88.4703	88.3976	88.3353	88.2719	88.2189	88.1417	88.075	88.0251	87.985
				5.B.2.: Anaerobic digestion at biogas facilities		kt CO2 eq.	NE	NE	NE	NE	NE	NE	NE	NE	NE	NE	NE	NE	NE	NE	NE	NE	NE	NE	NE	NE	NE	NE	NE	NE	NE	NE	NE	NE	NE	NE	NE	NE	NE	NE	NE	NE	NE	NE	NE	NE	NE	NE	NE
				5.C Incineration and open burning of waste	Total	kt CO2 eq.	27.7848	27.3096	27.7269	27.6374	28.9853	29.4361	29.8776	24.9612	23.7965	23.6206	20.5668	16.6313	24.1558	20.8128	18.8644	17.5482	16.2318	15.0272	14.227	12.6561	11.5494	10.6878	11.2585	11.8831	10.2661	10.2091	9.29693	10.2439	10.5904	10.6487	10.5348	10.4254	10.3203	10.2168	10.1173	10.0159	9.91873	9.82361	9.73185	9.63989	9.55118	9.47301	9.39782
				5.C.1. Waste incineration		kt CO2 eq.	16.0489	15.5737	15.991	15.9015	17.2494	17.7002	18.1417	17.513	17.2993	16.7096	15.8727	15.0068	23.2295	19.9938	18.3121	16.9845	15.8194	14.5435	13.9447	12.3844	11.3408	10.5009	11.1094	11.6668	10.1653	10.0537	9.21048	10.1339	10.4803	10.5387	10.4248	10.3154	10.2103	10.1068	10.0072	9.90586	9.80871	9.7136	9.62184	9.52988	9.44117	9.36299	9.28781
				5.C.2. Open burning		kt CO2 eq.	11.7359	11.7359	11.7359	11.7359	11.7359	11.7359	11.7359	7.44819	6.49724	6.91096	4.69414	1.62451	0.92625	0.819	0.552337	0.563712	0.412425	0.483763	0.282262	0.2717	0.20865	0.186875	0.149175	0.216287	0.10075	0.15535	0.08645	0.110012	0.110012	0.110012	0.110012	0.110012	0.110012	0.110012	0.110012	0.110012	0.110012	0.110012	0.110012	0.110012	0.110012	0.110012	0.110012
				5.D. Wastewater treatment and discharge	Total	kt CO2 eq.	2941.55	2917.25	2893.62	2842.22	2782.6	2750.03	2711.27	2676.47	2624.61	2591.51	2556.14	2490.41	2419.56	2366.62	2320.98	2279.58	2210.51	2149.35	2099.73	1997.44	1953.64	1908.09	1855.49	1811.28	1779.37	1749.47	1714.19	1648.19	1628.53	1609.5	1606.71	1584.36	1578.3	1574.38	1571.04	1565.42	1560.47	1555.25	1550.73	1544.03	1538.03	1528.73	1520.16
				5.D.1. Domestic wastewater		kt CO2 eq.	2649.46	2622.95	2604.24	2558.95	2508.4	2470.77	2435.86	2400.93	2349.5	2315.28	2279.58	2214.39	2157.4	2112.32	2067.76	2003.6	1963.85	1912.58	1877.65	1818.71	1778.64	1736.32	1693.02	1661.47	1622.53	1586.86	1562.95	1507.83	1488.44	1469.59	1467.2	1445.27	1439.6	1436.09	1433.14	1427.93	1423.38	1418.57	1414.45	1408.16	1402.56	1393.79	1385.75
				5.D.2. Industrial wastewater		kt CO2 eq.	292.086	294.302	289.38	283.266	274.201	279.261	275.404	275.539	275.108	276.229	276.56	276.023	262.161	254.308	253.219	275.981	246.668	236.773	222.083	178.725	174.999	171.773	162.478	149.808	156.842	162.613	151.24	140.356	140.083	139.907	139.508	139.097	138.696	138.294	137.899	137.488	137.085	136.681	136.283	135.871	135.465	134.937	134.415
			N2O
				Category		Unit	1990	1991	1992	1993	1994	1995	1996	1997	1998	1999	2000	2001	2002	2003	2004	2005	2006	2007	2008	2009	2010	2011	2012	2013	2014	2015	2016	2017	2018	2019	2020	2021	2022	2023	2024	2025	2026	2027	2028	2029	2030	2031	2032
				Waste sector (incl. energy recovery, etc.)	Total	kt CO2 eq.	4387.35	4460.71	4604.15	4604.1	4744.09	4945.85	5058.41	5166.5	5167.69	5168.87	5131.83	5063.12	4820.92	4875.39	4880.52	4945.32	4795.34	4594.88	4556.15	4358.49	4275.65	4319.65	4280.35	4289.65	4139.47	4187.58	4043.4	4079.52	4088.46	4128.04	3982.17	3876.8	3769.67	3664.01	3562.3	3460.1	3424.18	3387.74	3352.33	3313.5	3275.69	3257.72	3240.72
				1.A Fuel combustion	Total	kt CO2 eq.	381.425	393.401	394.249	396.41	403.042	420.502	427.852	446.545	461.749	467.162	493.986	507.213	405.565	398.997	387.006	382.718	381.227	363.912	367.671	340.474	336.71	330.759	349.227	337.879	338.004	322.69	360.788	365.936	343.787	347.484	350.403	353.511	357.121	360.521	364.544	366.711	369.567	372.221	375.557	376.936	378.992	382.751	387.204
				5.Waste	Total	kt CO2 eq.	4005.93	4067.31	4209.9	4207.69	4341.04	4525.35	4630.56	4719.96	4705.94	4701.71	4637.84	4555.91	4415.35	4476.39	4493.51	4562.6	4414.11	4230.97	4188.48	4018.01	3938.94	3988.89	3931.12	3951.77	3801.46	3864.89	3682.61	3713.59	3744.67	3780.56	3631.77	3523.29	3412.55	3303.49	3197.75	3093.39	3054.61	3015.52	2976.77	2936.56	2896.7	2874.97	2853.51
				5.B. Biological Treatment of Solid Waste	Total	kt CO2 eq.	180.773	178.81	179.195	179.617	178.736	179.14	179.59	180.431	179.484	180.229	181.177	182.837	231.965	272.693	281.513	318.976	329.298	318	357.48	354.297	309.171	341.905	338.459	334.668	333.144	339.527	343.263	298.166	295.61	294.822	294.903	294.753	294.583	294.4	294.245	294.019	293.823	293.623	293.452	293.213	293.003	292.849	292.724
				5.B.1.: Composting		kt CO2 eq.	180.773	178.81	179.195	179.617	178.736	179.14	179.59	180.431	179.484	180.229	181.177	182.837	231.965	272.693	281.513	318.976	329.298	318	357.48	354.297	309.171	341.905	338.459	334.668	333.144	339.527	343.263	298.166	295.61	294.822	294.903	294.753	294.583	294.4	294.245	294.019	293.823	293.623	293.452	293.213	293.003	292.849	292.724
				5.B.2.: Anaerobic digestion at biogas facilities		kt CO2 eq.	NO	NO	NO	NO	NO	NO	NO	NO	NO	NO	NO	NO	NO	NO	NO	NO	NO	NO	NO	NO	NO	NO	NO	NO	NO	NO	NO	NO	NO	NO	NO	NO	NO	NO	NO	NO	NO	NO	NO	NO	NO	NO	NO
				5.C Incineration and open burning of waste	Total	kt CO2 eq.	1438.04	1478.18	1611.18	1612.15	1770.02	1907.53	2028.57	2099.81	2104.03	2175.19	2155.89	2086.06	1910.76	1908.21	1898.58	1963.46	1843.36	1695.22	1627.69	1569.7	1514.58	1518.22	1523.25	1535.14	1422.88	1498.05	1311.73	1423.23	1452.85	1480.43	1359.53	1268.23	1173.01	1079.66	989.54	902.119	880.111	858.078	836.184	814.066	792.071	780.807	769.572
				5.C.1. Waste incineration		kt CO2 eq.	1435.25	1475.39	1608.39	1609.36	1767.23	1904.74	2025.78	2097.92	2102.41	2173.42	2154.75	2085.66	1910.53	1908.01	1898.44	1963.32	1843.26	1695.11	1627.62	1569.63	1514.53	1518.17	1523.21	1535.09	1422.86	1498.01	1311.71	1423.2	1452.82	1480.4	1359.5	1268.2	1172.98	1079.63	989.513	902.092	880.084	858.051	836.156	814.039	792.044	780.78	769.545
				5.C.2. Open burning		kt CO2 eq.	2.7908	2.7908	2.7908	2.7908	2.7908	2.7908	2.7908	1.88724	1.6171	1.76027	1.13778	0.403087	0.232022	0.20193	0.134395	0.139609	0.100803	0.116853	0.0694526	0.0684446	0.0510876	0.0453973	0.0367792	0.0515547	0.0243034	0.0368172	0.0212392	0.0270793	0.0270793	0.0270793	0.0270793	0.0270793	0.0270793	0.0270793	0.0270793	0.0270793	0.0270793	0.0270793	0.0270793	0.0270793	0.0270793	0.0270793	0.0270793
				5.D. Wastewater treatment and discharge	Total	kt CO2 eq.	2387.11	2410.31	2419.53	2415.92	2392.29	2438.68	2422.39	2439.72	2422.43	2346.3	2300.78	2287.01	2272.62	2295.49	2313.42	2280.17	2241.45	2217.75	2203.31	2094.02	2115.19	2128.77	2069.41	2081.96	2045.44	2027.32	2027.62	1992.19	1996.21	2005.31	1977.34	1960.31	1944.95	1929.43	1913.97	1897.25	1880.68	1863.82	1847.13	1829.29	1811.63	1801.31	1791.22
				5.D.1. Domestic wastewater		kt CO2 eq.	1765.71	1811.7	1800.47	1832.12	1825.34	1840.95	1847.59	1860.07	1851.46	1786.22	1750.07	1705.96	1691.6	1672.02	1656.95	1657.19	1652.26	1622.23	1609.41	1586.98	1589.64	1596.87	1538.17	1563.8	1539.93	1528.46	1527.09	1489.85	1493.95	1503.08	1476.94	1461.75	1448.21	1434.51	1420.88	1405.99	1391.24	1376.21	1361.35	1345.33	1329.5	1321.19	1313.1
				5.D.2. Industrial wastewater		kt CO2 eq.	621.402	598.615	619.056	583.804	566.946	597.725	574.802	579.644	570.972	560.072	550.712	581.045	581.021	623.478	656.47	622.986	589.187	595.512	593.906	507.037	525.546	531.896	531.249	518.164	505.502	498.856	500.534	502.34	502.268	502.222	500.396	498.568	496.742	494.915	493.091	491.262	489.435	487.609	485.784	483.955	482.127	480.122	478.118
[truncated: 18 more columns]
