# Supplementary material for: Japan’s greenhouse gas reduction scenarios toward net zero by 2050 in the material cycles and waste management sector
Source: Springer Nature journal article supplement (doi:10.1007/s10163-023-01650-7), 2023-04-25
Supplement: MOESM19 [file 25283090]

## Sheet: BAU
	■Amount collected, treated, and landfilled					Fiscal Year
						2017	2018	2019	2020	2021	2022	2023	2024	2025	2026	2027	2028	2029	2030	2031	2032	2033	2034	2035	2036	2037	2038	2039	2040	2041	2042	2043	2044	2045	2046	2047	2048	2049	2050
			Waste	kt	Collection	37007	36862.9	36870.7	36724.9	36481.8	36328.1	36164.5	36090.8	35812	35624.6	35430.8	35327.2	35024.7	34812.8	34595.2	34466	34143.1	33909.1	33670.3	33518.4	33179.1	32927.5	32672.5	32503.4	32154.2	31892	31628.6	31364.5	31185.5	30836.2	30572.6	30309.7	30129.7	29785.7
			Waste	kt	Incineration facility	34247	34170	34629	34499.4	34271	34126.6	33972.9	33903.6	33641.7	33465.7	33283.6	33186.4	32902.2	32703.1	32498.6	32377.3	32073.9	31854.2	31629.9	31487.2	31168.4	30932.1	30692.5	30533.6	30205.6	29959.3	29711.9	29463.8	29295.6	28967.5	28719.9	28472.9	28303.8	27980.7
			Waste	kt	Bulk waste treatment facility	1749.87	1746.23	1742.42	1730.79	1724.04	1716.78	1709.05	1700.9	1692.39	1683.53	1674.37	1664.92	1655.18	1645.17	1634.88	1624.33	1613.52	1602.46	1591.18	1579.67	1567.97	1556.08	1544.02	1531.83	1519.53	1507.14	1494.69	1482.21	1469.72	1457.24	1444.79	1432.36	1419.97	1407.6
			Waste	kt	Composting facility	219	225	216	216	215.191	213.767	212.866	211.908	211.476	209.842	208.744	207.608	207.001	205.229	203.987	202.712	201.955	200.063	198.692	197.293	196.403	194.414	192.94	191.446	190.455	188.409	186.873	185.329	183.782	182.732	180.686	179.141	177.601	176.546
			Waste	kt	Feed production facility	12	12	12	12	12	12	12	12	12	12	12	12	12	12	12	12	12	12	12	12	12	12	12	12	12	12	12	12	12	12	12	12	12	12
			Waste	kt	Other resource recovery facilities	2981.46	2819.1	2704.12	2582.01	2572.93	2551.39	2540.65	2529.21	2528.51	2504.56	2491.46	2477.91	2475.03	2449.51	2434.7	2419.48	2414.71	2387.87	2371.52	2354.82	2348.34	2320.48	2302.89	2285.05	2277.25	2248.82	2230.49	2212.07	2193.61	2184.94	2156.67	2138.24	2119.86	2111
			Waste	kt	Material recycling after incineration	1225.35	1222.6	1239.02	1234.38	1226.21	1221.04	1215.55	1213.07	1203.7	1197.4	1190.88	1187.4	1177.24	1170.11	1162.8	1158.46	1147.6	1139.74	1131.71	1126.61	1115.2	1106.75	1098.17	1092.49	1080.75	1071.94	1063.09	1054.21	1048.19	1036.45	1027.59	1018.76	1012.71	1001.15
			Waste	kt	Refuse fuel production facility	796.174	819.334	667.87	662.267	657.186	654.367	651.367	650.624	644.899	641.463	637.907	636.606	630.458	626.572	622.579	620.793	614.287	609.995	605.615	603.396	596.605	591.99	587.312	584.759	577.805	572.996	568.164	563.32	560.563	553.628	548.794	543.971	541.18	534.36
			Waste	kt	Other facilities	61	61	61	61	61	61	61	61	61	61	61	61	61	61	61	61	61	61	61	61	61	61	61	61	61	61	61	61	61	61	61	61	61	61
			Waste	kt	Landfill site	4075.42	4072.18	4046.58	4030.98	4004.29	3987.42	3969.47	3961.38	3930.77	3910.21	3888.93	3877.57	3844.36	3821.1	3797.21	3783.04	3747.59	3721.91	3695.7	3679.03	3641.79	3614.17	3586.18	3567.61	3529.29	3500.51	3471.6	3442.61	3422.96	3384.62	3355.69	3326.83	3307.08	3269.32
			Human waste	kl	Human waste treatment plant and sludge treatment center	19163	18957	18956	19068.4	18615.4	18547.6	18537.8	18522.5	18502.5	18478.3	18450.5	18419.3	18384.5	18346	18231.3	18113.6	17993	17869.7	17743.9	17615.6	17485	17352.4	17218	17082.1	16944.9	16806.7	16667.9	16528.8	16389.5	16250.3	16111.4	15972.9	15834.7	15696.8
			Human waste	kl	Community plant	19531.9	19491.3	19448.8	19319	19243.6	19162.6	19076.3	18985.4	18890.3	18791.5	18689.2	18583.7	18475	18363.3	18248.5	18130.7	18010	17886.6	17760.6	17632.2	17501.5	17368.8	17234.3	17098.2	16960.9	16822.6	16683.7	16544.4	16405	16265.7	16126.6	15987.9	15849.6	15711.6
	■Energy consumption					Fiscal Year
						2017	2018	2019	2020	2021	2022	2023	2024	2025	2026	2027	2028	2029	2030	2031	2032	2033	2034	2035	2036	2037	2038	2039	2040	2041	2042	2043	2044	2045	2046	2047	2048	2049	2050
			Power receiving	MWh	Collection	0	0	0	0	0	0	0	0	0	0	0	0	0	0	0	0	0	0	0	0	0	0	0	0	0	0	0	0	0	0	0	0	0	0
			Power receiving	MWh	Residue transportation	3.42344	3.28365	3.1845	3.07589	3.06359	3.04167	3.02882	3.01518	3.01043	2.98582	2.97024	2.95412	2.9469	2.92037	2.90253	2.88422	2.87461	2.8462	2.82655	2.80649	2.79498	2.76528	2.74418	2.72281	2.70987	2.67943	2.6575	2.63549	2.61343	2.59967	2.56933	2.54733	2.52539	2.51152
			Power receiving	MWh	Incineration facility	2.67776e+06	2.59414e+06	2.51855e+06	2.43077e+06	2.34923e+06	2.26247e+06	2.17827e+06	2.09236e+06	1.99755e+06	1.90481e+06	1.81212e+06	1.72079e+06	1.63222e+06	1.53757e+06	1.45411e+06	1.36956e+06	1.28419e+06	1.21068e+06	1.12968e+06	1.0547e+06	979596	923620	856575	801584	746230	701624	643328	592992	550048	511431	468315	427215	399812	374360
			Power receiving	MWh	Bulk waste treatment facility	187291	186902	186494	185249	184527	183750	182922	182051	181139	180192	179211	178199	177157	176085	174984	173855	172698	171514	170307	169075	167822	166549	165259	163955	162638	161312	159979	158644	157307	155971	154638	153308	151982	150658
			Power receiving	MWh	Composting facility	86933	526916	505839	505839	503945	500609	498500	496256	495244	491417	488847	486187	484766	480614	477707	474720	472948	468516	465306	462030	459945	455289	451836	448337	446016	441225	437627	434013	430389	427932	423139	419522	415914	413445
			Power receiving	MWh	Feed production facility	28102.2	28102.2	28102.2	28102.2	28102.2	28102.2	28102.2	28102.2	28102.2	28102.2	28102.2	28102.2	28102.2	28102.2	28102.2	28102.2	28102.2	28102.2	28102.2	28102.2	28102.2	28102.2	28102.2	28102.2	28102.2	28102.2	28102.2	28102.2	28102.2	28102.2	28102.2	28102.2	28102.2	28102.2
			Power receiving	MWh	Other resource recovery facilities	265133	250694	240470	229610	228803	226888	225932	224916	224854	222723	221559	220353	220098	217828	216511	215158	214733	212347	210892	209408	208832	206353	204789	203203	202509	199981	198351	196713	195071	194301	191786	190148	188513	187725
			Power receiving	MWh	Material recycling after incineration	30256.6	30188.6	30594.1	30479.6	30277.8	30150.2	30014.5	29953.3	29721.8	29566.4	29405.5	29319.5	29068.5	28892.6	28712	28604.8	28336.7	28142.6	27944.4	27818.4	27536.7	27327.9	27116.3	26975.9	26686.1	26468.5	26249.9	26030.7	25882.1	25592.2	25373.5	25155.3	25005.9	24720.4
			Power receiving	MWh	Refuse fuel production facility	131280	132418	132418	128959	128004	127452	126876	126614	125646	124976	124293	123926	122874	122117	121351	120906	119585	118767	117929	117362	116203	115373	114477	113881	112734	111784	110769	110740	110292	109079	108158	107239	106610	105415
			Power receiving	MWh	Other facilities	19838.1	19838.1	19838.1	19838.1	19838.1	19838.1	19838.1	19838.1	19838.1	19838.1	19838.1	19838.1	19838.1	19838.1	19838.1	19838.1	19838.1	19838.1	19838.1	19838.1	19838.1	19838.1	19838.1	19838.1	19838.1	19838.1	19838.1	19838.1	19838.1	19838.1	19838.1	19838.1	19838.1	19838.1
			Power receiving	MWh	Landfill site	156192	156068	155087	154489	153466	152820	152132	151822	150649	149861	149045	148610	147337	146446	145530	144987	143628	142644	141639	141001	139573	138515	137442	136730	135262	134159	133051	131940	131186	129717	128608	127502	126745	125298
			Power receiving	MWh	Human waste treatment plant and sludge treatment center	954352	934583	928806	926746	903774	894598	888479	883155	877236	871557	865646	862571	860647	861239	853036	847684	842552	834173	825238	819577	810753	802058	794591	788397	779557	772307	762930	754874	746363	737804	729849	722114	715637	711783
			Power receiving	MWh	Community plant	244626	244119	243586	241960	241016	240001	238920	237782	236591	235354	234073	232751	231390	229990	228552	227077	225566	224020	222442	220834	219197	217535	215850	214146	212426	210694	208954	207209	205463	203719	201977	200240	198508	196779
						2017	2018	2019	2020	2021	2022	2023	2024	2025	2026	2027	2028	2029	2030	2031	2032	2033	2034	2035	2036	2037	2038	2039	2040	2041	2042	2043	2044	2045	2046	2047	2048	2049	2050
			Fuel	GJ	Collection	6.37771e+06	6.35288e+06	6.35422e+06	6.3291e+06	6.2872e+06	6.26071e+06	6.23252e+06	6.21981e+06	6.17176e+06	6.13947e+06	6.10606e+06	6.08822e+06	6.03608e+06	5.99957e+06	5.96206e+06	5.9398e+06	5.88414e+06	5.84383e+06	5.80267e+06	5.7765e+06	5.71802e+06	5.67466e+06	5.63071e+06	5.60156e+06	5.54139e+06	5.4962e+06	5.45081e+06	5.4053e+06	5.37443e+06	5.31424e+06	5.26882e+06	5.2235e+06	5.1925e+06	5.13321e+06
			Fuel	GJ	Residue transportation	770.103	755.92	751.612	740.226	735.726	731.936	728.986	726.906	723.465	719.143	715.585	712.932	708.984	704.197	700.028	696.751	692.219	686.879	682.297	678.598	673.697	668.033	663.13	659.112	653.962	648.108	643.031	637.938	633.745	628.514	622.653	617.575	613.386	608.203
			Fuel	GJ	Incineration facility	1.24978e+07	1.25195e+07	1.27423e+07	1.25117e+07	1.25712e+07	1.25948e+07	1.27018e+07	1.28831e+07	1.29669e+07	1.30487e+07	1.30999e+07	1.31723e+07	1.3223e+07	1.32451e+07	1.32509e+07	1.32464e+07	1.31909e+07	1.31155e+07	1.3046e+07	1.29907e+07	1.28982e+07	1.27755e+07	1.26083e+07	1.25142e+07	1.23419e+07	1.22214e+07	1.20005e+07	1.17219e+07	1.15526e+07	1.13485e+07	1.1093e+07	1.08721e+07	1.07951e+07	1.06425e+07
			Fuel	GJ	Bulk waste treatment facility	165938	165593	165232	164129	163489	162800	162067	161295	160487	159648	158779	157883	156959	156010	155034	154034	153008	151960	150890	149799	148689	147561	146418	145262	144095	142921	141740	140557	139372	138189	137008	135829	134654	133481
			Fuel	GJ	Composting facility	136214	139946	134348	134348	133845	132959	132399	131803	131534	130518	129835	129129	128751	127649	126877	126083	125613	124436	123583	122713	122159	120923	120006	119076	118460	117187	116232	115272	114309	113657	112384	111423	110465	109809
			Fuel	GJ	Feed production facility	42852.1	42852.1	42852.1	42852.1	42852.1	42852.1	42852.1	42852.1	42852.1	42852.1	42852.1	42852.1	42852.1	42852.1	42852.1	42852.1	42852.1	42852.1	42852.1	42852.1	42852.1	42852.1	42852.1	42852.1	42852.1	42852.1	42852.1	42852.1	42852.1	42852.1	42852.1	42852.1	42852.1	42852.1
			Fuel	GJ	Other resource recovery facilities	393744	372302	357118	340990	339792	336947	335528	334018	333926	330762	329033	327242	326863	323493	321536	319527	318897	315352	313192	310987	310132	306452	304128	301774	300742	296988	294567	292135	289697	288552	284818	282385	279957	278787
			Fuel	GJ	Material recycling after incineration	1.20923e+06	1.20651e+06	1.22272e+06	1.21814e+06	1.21007e+06	1.20497e+06	1.19955e+06	1.1971e+06	1.18786e+06	1.18164e+06	1.17521e+06	1.17178e+06	1.16174e+06	1.15471e+06	1.14749e+06	1.14321e+06	1.1325e+06	1.12474e+06	1.11682e+06	1.11178e+06	1.10053e+06	1.09218e+06	1.08372e+06	1.07811e+06	1.06653e+06	1.05783e+06	1.0491e+06	1.04034e+06	1.0344e+06	1.02281e+06	1.01407e+06	1.00535e+06	999380	987970
			Fuel	GJ	Refuse fuel production facility	1.48201e+06	1.49355e+06	1.49355e+06	1.48507e+06	1.47513e+06	1.46891e+06	1.46229e+06	1.45931e+06	1.44804e+06	1.44046e+06	1.43261e+06	1.42842e+06	1.4162e+06	1.40762e+06	1.39882e+06	1.3936e+06	1.38013e+06	1.37067e+06	1.36102e+06	1.35488e+06	1.34116e+06	1.33099e+06	1.32068e+06	1.31385e+06	1.29973e+06	1.28913e+06	1.27878e+06	1.26932e+06	1.26232e+06	1.24821e+06	1.23756e+06	1.22693e+06	1.21966e+06	1.20576e+06
			Fuel	GJ	Other facilities	7974.31	7974.31	7974.31	7974.31	7974.31	7974.31	7974.31	7974.31	7974.31	7974.31	7974.31	7974.31	7974.31	7974.31	7974.31	7974.31	7974.31	7974.31	7974.31	7974.31	7974.31	7974.31	7974.31	7974.31	7974.31	7974.31	7974.31	7974.31	7974.31	7974.31	7974.31	7974.31	7974.31	7974.31
			Fuel	GJ	Landfill site	331146	330884	328803	327536	325367	323996	322538	321880	319393	317722	315993	315070	312372	310482	308541	307389	304509	302422	300293	298938	295912	293668	291393	289885	286771	284433	282083	279728	278131	275016	272665	270320	268716	265648
			Fuel	GJ	Human waste treatment plant and sludge treatment center	2.14499e+06	2.09961e+06	2.06335e+06	2.03985e+06	1.98382e+06	1.94571e+06	1.90841e+06	1.87159e+06	1.83838e+06	1.80196e+06	1.77212e+06	1.73685e+06	1.70792e+06	1.68102e+06	1.64596e+06	1.61093e+06	1.57782e+06	1.54061e+06	1.5047e+06	1.4802e+06	1.44529e+06	1.41294e+06	1.37688e+06	1.35001e+06	1.32411e+06	1.29121e+06	1.26034e+06	1.22725e+06	1.20433e+06	1.167e+06	1.14633e+06	1.12698e+06	1.10457e+06	1.08958e+06
			Fuel	GJ	Community plant	118.654	117.378	117.372	118.068	115.263	114.843	114.783	114.688	114.564	114.414	114.242	114.049	113.833	113.595	112.884	112.156	111.409	110.646	109.867	109.072	108.264	107.443	106.611	105.769	104.92	104.064	103.205	102.343	101.48	100.619	99.7588	98.9008	98.0451	97.1912
			Electric power transmission	MWh	Incineration facility	5.10019e+06	5.17392e+06	5.60367e+06	5.82151e+06	6.01411e+06	6.24197e+06	6.47391e+06	6.73075e+06	6.93667e+06	7.17068e+06	7.39957e+06	7.639e+06	7.81381e+06	8.01365e+06	8.18592e+06	8.38671e+06	8.53248e+06	8.66229e+06	8.79789e+06	8.96298e+06	9.06502e+06	9.13765e+06	9.23029e+06	9.33936e+06	9.36622e+06	9.40814e+06	9.46801e+06	9.49411e+06	9.54245e+06	9.52418e+06	9.53148e+06	9.53459e+06	9.54129e+06	9.47812e+06
			Electric power transmission	MWh	Methane fermentation facility	4225.83	4415.98	4415.98	729.043	598.851	580.92	575.926	570.612	578.074	559.157	553.07	546.771	553.057	533.577	526.693	534.544	612.017	610.071	602.789	704.711	801.34	974.648	957.824	940.773	1198.83	1223.35	75.0315	390.3	452.789	455.737	455.737	455.737	455.737	458.34
			External heat supply	GJ	External heat supply	3.05045e+06	2.97521e+06	3.01616e+06	3.00301e+06	2.97117e+06	2.96555e+06	2.95433e+06	2.96616e+06	2.95419e+06	2.95554e+06	2.93954e+06	2.96642e+06	2.92778e+06	2.8966e+06	2.88993e+06	2.91689e+06	2.87982e+06	2.87864e+06	2.88112e+06	2.89478e+06	2.90328e+06	2.91491e+06	2.84906e+06	2.86803e+06	2.86804e+06	2.86809e+06	2.88401e+06	2.89757e+06	2.88974e+06	2.88122e+06	2.88815e+06	2.89833e+06	2.90683e+06	2.88936e+06
						2017	2018	2019	2020	2021	2022	2023	2024	2025	2026	2027	2028	2029	2030	2031	2032	2033	2034	2035	2036	2037	2038	2039	2040	2041	2042	2043	2044	2045	2046	2047	2048	2049	2050
			Power receiving	GWh	Collection	0	0	0	0	0	0	0	0	0	0	0	0	0	0	0	0	0	0	0	0	0	0	0	0	0	0	0	0	0	0	0	0	0	0
			Power receiving	GWh	Residue transportation	0.00342344	0.00328365	0.0031845	0.00307589	0.00306359	0.00304167	0.00302882	0.00301518	0.00301043	0.00298582	0.00297024	0.00295412	0.0029469	0.00292037	0.00290253	0.00288422	0.00287461	0.0028462	0.00282655	0.00280649	0.00279498	0.00276528	0.00274418	0.00272281	0.00270987	0.00267943	0.0026575	0.00263549	0.00261343	0.00259967	0.00256933	0.00254733	0.00252539	0.00251152
			Power receiving	GWh	Incineration facility	2677.76	2594.14	2518.55	2430.77	2349.23	2262.47	2178.27	2092.36	1997.55	1904.81	1812.12	1720.79	1632.22	1537.57	1454.11	1369.56	1284.19	1210.68	1129.68	1054.7	979.596	923.62	856.575	801.584	746.23	701.624	643.328	592.992	550.048	511.431	468.315	427.215	399.812	374.36
			Power receiving	GWh	Bulk waste treatment facility	187.291	186.902	186.494	185.249	184.527	183.75	182.922	182.051	181.139	180.192	179.211	178.199	177.157	176.085	174.984	173.855	172.698	171.514	170.307	169.075	167.822	166.549	165.259	163.955	162.638	161.312	159.979	158.644	157.307	155.971	154.638	153.308	151.982	150.658
			Power receiving	GWh	Composting facility	86.933	526.916	505.839	505.839	503.945	500.609	498.5	496.256	495.244	491.417	488.847	486.187	484.766	480.614	477.707	474.72	472.948	468.516	465.306	462.03	459.945	455.289	451.836	448.337	446.016	441.225	437.627	434.013	430.389	427.932	423.139	419.522	415.914	413.445
			Power receiving	GWh	Feed production facility	28.1022	28.1022	28.1022	28.1022	28.1022	28.1022	28.1022	28.1022	28.1022	28.1022	28.1022	28.1022	28.1022	28.1022	28.1022	28.1022	28.1022	28.1022	28.1022	28.1022	28.1022	28.1022	28.1022	28.1022	28.1022	28.1022	28.1022	28.1022	28.1022	28.1022	28.1022	28.1022	28.1022	28.1022
			Power receiving	GWh	Other resource recovery facilities	265.133	250.694	240.47	229.61	228.803	226.888	225.932	224.916	224.854	222.723	221.559	220.353	220.098	217.828	216.511	215.158	214.733	212.347	210.892	209.408	208.832	206.353	204.789	203.203	202.509	199.981	198.351	196.713	195.071	194.301	191.786	190.148	188.513	187.725
			Power receiving	GWh	Material recycling after incineration	30.2566	30.1886	30.5941	30.4796	30.2778	30.1502	30.0145	29.9533	29.7218	29.5664	29.4055	29.3195	29.0685	28.8926	28.712	28.6048	28.3367	28.1426	27.9444	27.8184	27.5367	27.3279	27.1163	26.9759	26.6861	26.4685	26.2499	26.0307	25.8821	25.5922	25.3735	25.1553	25.0059	24.7204
			Power receiving	GWh	Refuse fuel production facility	131.28	132.418	132.418	128.959	128.004	127.452	126.876	126.614	125.646	124.976	124.293	123.926	122.874	122.117	121.351	120.906	119.585	118.767	117.929	117.362	116.203	115.373	114.477	113.881	112.734	111.784	110.769	110.74	110.292	109.079	108.158	107.239	106.61	105.415
			Power receiving	GWh	Other facilities	19.8381	19.8381	19.8381	19.8381	19.8381	19.8381	19.8381	19.8381	19.8381	19.8381	19.8381	19.8381	19.8381	19.8381	19.8381	19.8381	19.8381	19.8381	19.8381	19.8381	19.8381	19.8381	19.8381	19.8381	19.8381	19.8381	19.8381	19.8381	19.8381	19.8381	19.8381	19.8381	19.8381	19.8381
			Power receiving	GWh	Landfill site	156.192	156.068	155.087	154.489	153.466	152.82	152.132	151.822	150.649	149.861	149.045	148.61	147.337	146.446	145.53	144.987	143.628	142.644	141.639	141.001	139.573	138.515	137.442	136.73	135.262	134.159	133.051	131.94	131.186	129.717	128.608	127.502	126.745	125.298
			Power receiving	GWh	Human waste treatment plant and sludge treatment center	954.352	934.583	928.806	926.746	903.774	894.598	888.479	883.155	877.236	871.557	865.646	862.571	860.647	861.239	853.036	847.684	842.552	834.173	825.238	819.577	810.753	802.058	794.591	788.397	779.557	772.307	762.93	754.874	746.363	737.804	729.849	722.114	715.637	711.783
			Power receiving	GWh	Community plant	244.626	244.119	243.586	241.96	241.016	240.001	238.92	237.782	236.591	235.354	234.073	232.751	231.39	229.99	228.552	227.077	225.566	224.02	222.442	220.834	219.197	217.535	215.85	214.146	212.426	210.694	208.954	207.209	205.463	203.719	201.977	200.24	198.508	196.779
	*converted at 1kWh=3.6MJ		Fuel	GWh	Collection	1771.59	1764.69	1765.06	1758.08	1746.44	1739.09	1731.26	1727.73	1714.38	1705.41	1696.13	1691.17	1676.69	1666.55	1656.13	1649.94	1634.48	1623.28	1611.85	1604.58	1588.34	1576.29	1564.09	1555.99	1539.27	1526.72	1514.11	1501.47	1492.9	1476.18	1463.56	1450.97	1442.36	1425.89
	*converted at 1kWh=3.6MJ		Fuel	GWh	Residue transportation	0.213917	0.209978	0.208781	0.205618	0.204368	0.203316	0.202496	0.201918	0.200963	0.199762	0.198774	0.198037	0.19694	0.19561	0.194452	0.193542	0.192283	0.1908	0.189527	0.1885	0.187138	0.185565	0.184203	0.183087	0.181656	0.18003	0.17862	0.177205	0.17604	0.174587	0.172959	0.171549	0.170385	0.168945
	*converted at 1kWh=3.6MJ		Fuel	GWh	Incineration facility	3471.62	3477.65	3539.52	3475.46	3491.99	3498.57	3528.28	3578.63	3601.91	3624.64	3638.86	3658.98	3673.05	3679.21	3680.81	3679.55	3664.14	3643.18	3623.89	3608.53	3582.84	3548.75	3502.3	3476.17	3428.3	3394.83	3333.48	3256.08	3209.04	3152.36	3081.4	3020.02	2998.64	2956.25
	*converted at 1kWh=3.6MJ		Fuel	GWh	Bulk waste treatment facility	46.0939	45.9982	45.8978	45.5914	45.4137	45.2223	45.0187	44.8042	44.5798	44.3466	44.1053	43.8563	43.5998	43.3361	43.0651	42.7871	42.5023	42.2111	41.9139	41.6108	41.3024	40.9892	40.6717	40.3506	40.0265	39.7002	39.3723	39.0435	38.7145	38.3858	38.0577	37.7304	37.4039	37.0782
	*converted at 1kWh=3.6MJ		Fuel	GWh	Composting facility	37.8373	38.874	37.319	37.319	37.1793	36.9331	36.7775	36.612	36.5373	36.255	36.0654	35.8691	35.7643	35.458	35.2435	35.0232	34.8924	34.5655	34.3286	34.0869	33.9331	33.5896	33.3349	33.0767	32.9055	32.552	32.2866	32.0199	31.7526	31.5713	31.2177	30.9508	30.6847	30.5025
	*converted at 1kWh=3.6MJ		Fuel	GWh	Feed production facility	11.9034	11.9034	11.9034	11.9034	11.9034	11.9034	11.9034	11.9034	11.9034	11.9034	11.9034	11.9034	11.9034	11.9034	11.9034	11.9034	11.9034	11.9034	11.9034	11.9034	11.9034	11.9034	11.9034	11.9034	11.9034	11.9034	11.9034	11.9034	11.9034	11.9034	11.9034	11.9034	11.9034	11.9034
	*converted at 1kWh=3.6MJ		Fuel	GWh	Other resource recovery facilities	109.373	103.417	99.1994	94.7195	94.3866	93.5965	93.2022	92.7827	92.7572	91.8784	91.3979	90.9007	90.7953	89.8591	89.3157	88.7574	88.5824	87.5978	86.9978	86.3853	86.1477	85.1255	84.4801	83.826	83.5395	82.4967	81.8243	81.1486	80.4713	80.1534	79.1162	78.4402	77.7658	77.4409
	*converted at 1kWh=3.6MJ		Fuel	GWh	Material recycling after incineration	335.896	335.141	339.643	338.372	336.131	334.715	333.208	332.529	329.96	328.234	326.448	325.494	322.706	320.754	318.748	317.559	314.583	312.428	310.227	308.828	305.702	303.383	301.034	299.475	296.258	293.843	291.416	288.982	287.333	284.114	281.686	279.263	277.606	274.436
	*converted at 1kWh=3.6MJ		Fuel	GWh	Refuse fuel production facility	411.67	414.876	414.876	412.518	409.76	408.03	406.192	405.363	402.234	400.126	397.948	396.784	393.389	391.005	388.56	387.112	383.368	380.742	378.06	376.355	372.545	369.72	366.856	364.957	361.037	358.093	355.216	352.588	350.644	346.726	343.766	340.814	338.794	334.934
	*converted at 1kWh=3.6MJ		Fuel	GWh	Other facilities	2.21509	2.21509	2.21509	2.21509	2.21509	2.21509	2.21509	2.21509	2.21509	2.21509	2.21509	2.21509	2.21509	2.21509	2.21509	2.21509	2.21509	2.21509	2.21509	2.21509	2.21509	2.21509	2.21509	2.21509	2.21509	2.21509	2.21509	2.21509	2.21509	2.21509	2.21509	2.21509	2.21509	2.21509
	*converted at 1kWh=3.6MJ		Fuel	GWh	Landfill site	91.9851	91.9121	91.3342	90.9821	90.3798	89.999	89.5938	89.4111	88.7203	88.2562	87.776	87.5195	86.77	86.245	85.7058	85.3859	84.5858	84.0062	83.4147	83.0384	82.1977	81.5744	80.9426	80.5236	79.6586	79.0091	78.3565	77.7023	77.2586	76.3933	75.7404	75.089	74.6432	73.791
	*converted at 1kWh=3.6MJ		Fuel	GWh	Human waste treatment plant and sludge treatment center	595.83	583.226	573.153	566.624	551.062	540.476	530.114	519.885	510.661	500.544	492.256	482.459	474.424	466.95	457.212	447.48	438.284	427.947	417.971	411.168	401.468	392.484	382.465	375.004	367.809	358.668	350.094	340.904	334.535	324.166	318.424	313.051	306.824	302.662
	*converted at 1kWh=3.6MJ		Fuel	GWh	Community plant	0.0329593	0.032605	0.0326033	0.0327966	0.0320175	0.0319008	0.031884	0.0318577	0.0318232	0.0317817	0.0317339	0.0316802	0.0316204	0.0315541	0.0313568	0.0311544	0.030947	0.030735	0.0305185	0.0302979	0.0300733	0.0298452	0.0296141	0.0293803	0.0291443	0.0289067	0.0286679	0.0284286	0.028189	0.0279497	0.0277108	0.0274724	0.0272347	0.0269976
						2017	2018	2019	2020	2021	2022	2023	2024	2025	2026	2027	2028	2029	2030	2031	2032	2033	2034	2035	2036	2037	2038	2039	2040	2041	2042	2043	2044	2045	2046	2047	2048	2049	2050
			Power receiving+Fuel	GWh	Collection	1771.59	1764.69	1765.06	1758.08	1746.44	1739.09	1731.26	1727.73	1714.38	1705.41	1696.13	1691.17	1676.69	1666.55	1656.13	1649.94	1634.48	1623.28	1611.85	1604.58	1588.34	1576.29	1564.09	1555.99	1539.27	1526.72	1514.11	1501.47	1492.9	1476.18	1463.56	1450.97	1442.36	1425.89
			Power receiving+Fuel	GWh	Residue transportation	0.217341	0.213261	0.211966	0.208694	0.207432	0.206357	0.205525	0.204934	0.203973	0.202748	0.201744	0.200991	0.199887	0.198531	0.197355	0.196426	0.195158	0.193646	0.192354	0.191306	0.189933	0.18833	0.186947	0.18581	0.184366	0.182709	0.181277	0.179841	0.178654	0.177187	0.175528	0.174096	0.17291	0.171457
			Power receiving+Fuel	GWh	Incineration facility	6149.38	6071.79	6058.07	5906.23	5841.23	5761.04	5706.54	5670.99	5599.46	5529.46	5450.98	5379.77	5305.27	5216.78	5134.93	5049.11	4948.34	4853.86	4753.58	4663.24	4562.43	4472.37	4358.88	4277.76	4174.53	4096.45	3976.81	3849.07	3759.09	3663.79	3549.72	3447.24	3398.46	3330.61
			Power receiving+Fuel	GWh	Bulk waste treatment facility	233.385	232.9	232.392	230.841	229.941	228.972	227.941	226.855	225.719	224.538	223.316	222.055	220.757	219.421	218.049	216.642	215.2	213.725	212.22	210.686	209.124	207.538	205.931	204.305	202.664	201.012	199.352	197.687	196.021	194.357	192.696	191.039	189.386	187.736
			Power receiving+Fuel	GWh	Composting facility	124.77	565.79	543.158	543.158	541.125	537.542	535.277	532.867	531.781	527.672	524.912	522.056	520.53	516.072	512.95	509.743	507.84	503.082	499.635	496.116	493.878	488.879	485.171	481.414	478.922	473.777	469.914	466.033	462.141	459.503	454.357	450.473	446.599	443.947
			Power receiving+Fuel	GWh	Feed production facility	40.0055	40.0055	40.0055	40.0055	40.0055	40.0055	40.0055	40.0055	40.0055	40.0055	40.0055	40.0055	40.0055	40.0055	40.0055	40.0055	40.0055	40.0055	40.0055	40.0055	40.0055	40.0055	40.0055	40.0055	40.0055	40.0055	40.0055	40.0055	40.0055	40.0055	40.0055	40.0055	40.0055	40.0055
			Power receiving+Fuel	GWh	Other resource recovery facilities	374.507	354.112	339.67	324.33	323.19	320.485	319.135	317.698	317.611	314.602	312.957	311.254	310.893	307.688	305.827	303.915	303.316	299.945	297.89	295.793	294.979	291.479	289.269	287.029	286.049	282.478	280.175	277.862	275.543	274.454	270.903	268.588	266.279	265.166
			Power receiving+Fuel	GWh	Material recycling after incineration	366.153	365.33	370.237	368.851	366.409	364.865	363.223	362.482	359.682	357.8	355.853	354.813	351.775	349.647	347.46	346.163	342.92	340.57	338.172	336.646	333.238	330.711	328.15	326.451	322.944	320.311	317.666	315.013	313.215	309.707	307.059	304.419	302.612	299.157
			Power receiving+Fuel	GWh	Refuse fuel production facility	542.95	547.293	547.293	541.477	537.763	535.482	533.069	531.977	527.88	525.102	522.241	520.711	516.262	513.123	509.911	508.017	502.954	499.508	495.99	493.717	488.748	485.093	481.333	478.838	473.771	469.877	465.985	463.328	460.936	455.805	451.924	448.052	445.403	440.348
			Power receiving+Fuel	GWh	Other facilities	22.0532	22.0532	22.0532	22.0532	22.0532	22.0532	22.0532	22.0532	22.0532	22.0532	22.0532	22.0532	22.0532	22.0532	22.0532	22.0532	22.0532	22.0532	22.0532	22.0532	22.0532	22.0532	22.0532	22.0532	22.0532	22.0532	22.0532	22.0532	22.0532	22.0532	22.0532	22.0532	22.0532	22.0532
			Power receiving+Fuel	GWh	Landfill site	248.177	247.98	246.421	245.471	243.846	242.819	241.726	241.233	239.369	238.117	236.821	236.129	234.107	232.691	231.236	230.372	228.214	226.65	225.054	224.039	221.771	220.089	218.385	217.254	214.92	213.168	211.407	209.642	208.445	206.111	204.349	202.591	201.389	199.089
			Power receiving+Fuel	GWh	Human waste treatment plant and sludge treatment center	1550.18	1517.81	1501.96	1493.37	1454.84	1435.07	1418.59	1403.04	1387.9	1372.1	1357.9	1345.03	1335.07	1328.19	1310.25	1295.16	1280.84	1262.12	1243.21	1230.74	1212.22	1194.54	1177.06	1163.4	1147.37	1130.98	1113.02	1095.78	1080.9	1061.97	1048.27	1035.17	1022.46	1014.44
			Power receiving+Fuel	GWh	Community plant	244.659	244.151	243.618	241.993	241.048	240.033	238.952	237.814	236.623	235.385	234.104	232.783	231.422	230.022	228.584	227.108	225.597	224.051	222.473	220.864	219.227	217.565	215.88	214.176	212.455	210.723	208.983	207.238	205.491	203.747	202.005	200.268	198.535	196.806
					Energy supply (electricity and heat)	-5951.76	-6004.78	-6445.9	-6656.41	-6840.03	-7066.31	-7295.13	-7555.26	-7757.86	-7992.22	-8216.66	-8463.55	-8627.63	-8818.79	-8989.21	-9197.49	-9333.05	-9462.52	-9598.8	-9767.79	-9872.29	-9948.32	-10022.7	-10137	-10164.1	-10206.1	-10269.2	-10299.4	-10345.6	-10325	-10334.2	-10340.1	-10349.2	-10281.2
					Energy balance	5716.26	5969.33	5464.25	5059.66	4748.06	4401.35	4082.85	3759.69	3444.8	3100.22	2760.82	2414.48	2137.4	1823.64	1528.37	1200.95	918.903	646.527	363.521	70.8865	-186.082	-401.516	-636.269	-868.113	-1048.95	-1218.32	-1449.53	-1654.02	-1828.69	-1957.11	-2127.12	-2279.1	-2373.49	-2415.75
			Electric power transmission	GWh	Incineration facility	5100.19	5173.92	5603.67	5821.51	6014.11	6241.97	6473.91	6730.75	6936.67	7170.68	7399.57	7639	7813.81	8013.65	8185.92	8386.71	8532.48	8662.29	8797.89	8962.98	9065.02	9137.65	9230.29	9339.36	9366.22	9408.14	9468.01	9494.11	9542.45	9524.18	9531.48	9534.59	9541.29	9478.12
			Electric power transmission	GWh	Methane fermentation facility	4.22583	4.41598	4.41598	0.729043	0.598851	0.58092	0.575926	0.570612	0.578074	0.559157	0.55307	0.546771	0.553057	0.533577	0.526693	0.534544	0.612017	0.610071	0.602789	0.704711	0.80134	0.974648	0.957824	0.940773	1.19883	1.22335	0.0750315	0.3903	0.452789	0.455737	0.455737	0.455737	0.455737	0.45834
	*converted at 1kWh=3.6MJ		External heat supply	GWh	External heat supply	847.348	826.448	837.821	834.17	825.326	823.763	820.648	823.934	820.609	820.984	816.539	824.005	813.271	804.612	802.757	810.247	799.95	799.621	800.311	804.107	806.466	809.696	791.407	796.674	796.678	796.692	801.114	804.881	802.706	800.338	802.264	805.092	807.453	802.6

## Sheet: Planning
					Fiscal Year
					2017	2018	2019	2020	2021	2022	2023	2024	2025	2026	2027	2028	2029	2030	2031	2032	2033	2034	2035	2036	2037	2038	2039	2040	2041	2042	2043	2044	2045	2046	2047	2048	2049	2050
		Waste	kt	Collection	37007	36862.9	36870.7	36506.8	36189.3	35959.9	35720.7	35571	35218	34963.5	34702.4	34531.3	34162.1	33883.2	33671.3	33545.6	33231.3	33003.6	32771.2	32623.4	32293.1	32048.2	31800	31635.4	31295.5	31040.4	30784	30527	30352.7	30012.7	29756.2	29500.3	29325.1	28990.3
		Waste	kt	Incineration facility	34247	34170	34629	34239.8	33870.8	33584.3	33288.6	33076.8	32674.4	32363.5	32046.4	31813.6	31395.3	31061.4	30838.9	30696.7	30378.5	30141.2	29899.4	29744	29418.2	29172.2	28923	28751.9	28417.3	28161.6	27904.8	27647.5	27467.3	27132.5	26875.6	26619.3	26438.4	26108.4
		Waste	kt	Bulk waste treatment facility	1749.87	1746.23	1742.42	1730.79	1724.04	1716.78	1709.05	1700.9	1692.39	1683.53	1674.37	1664.92	1655.18	1645.17	1634.88	1624.33	1613.52	1602.46	1591.18	1579.67	1567.97	1556.08	1544.02	1531.83	1519.53	1507.14	1494.69	1482.21	1469.72	1457.24	1444.79	1432.36	1419.97	1407.6
		Waste	kt	Composting facility	225	216	216	214.6	212.584	211.093	209.543	208.52	206.295	204.606	202.879	201.681	199.317	197.484	196.25	195.517	193.685	192.358	191.003	190.142	188.217	186.79	185.343	184.383	182.403	180.916	179.421	177.923	176.907	174.926	173.431	171.939	170.919	168.967
		Waste	kt	Feed production facility	12	12	12	12	12	12	12	12	12	12	12	12	12	12	12	12	12	12	12	12	12	12	12	12	12	12	12	12	12	12	12	12	12	12
		Waste	kt	Other resource recovery facilities	2871.59	2756.51	2634.28	2545.66	2564.03	2593.23	2622.46	2663.43	2682.4	2705.79	2729.75	2765.64	2779.85	2806.26	2825.37	2851.12	2855.35	2868.75	2881.65	2896.86	2892.05	2896.63	2900.93	2914.45	2908.94	2912.82	2916.63	2920.41	2933.27	2927.97	2931.88	2935.83	2948.64	2943.85
		Waste	kt	Material recycling after incineration	1225.35	1222.6	1239.02	1225.1	1211.89	1201.64	1191.06	1183.48	1169.09	1157.96	1146.62	1138.29	1123.32	1111.37	1103.41	1098.33	1086.94	1078.45	1069.8	1064.24	1052.58	1043.78	1034.86	1028.74	1016.77	1007.62	998.432	989.223	982.778	970.799	961.607	952.435	945.962	934.155
		Waste	kt	Refuse fuel production facility	796.174	819.334	667.87	629.174	615.36	603.771	591.987	582.599	568.086	549.816	531.417	515.392	494.259	475.506	473.612	473.645	469.568	467.426	465.211	462.606	456.02	451.334	446.596	443.712	436.994	432.147	427.281	422.405	419.348	412.65	407.782	402.923	399.835	393.235
		Waste	kt	Other facilities	61	61	61	61	61	61	61	61	61	61	61	61	61	61	61	61	61	61	61	61	61	61	61	61	61	61	61	61	61	61	61	61	61	61
		Waste	kt	Landfill site	4075.42	4072.18	4046.58	3980.95	3919.03	3866.36	3812.66	3768.36	3702.7	3670.35	3637.31	3613.71	3569.32	3534.4	3508.95	3492.53	3456.33	3429.21	3401.6	3385.23	3349.73	3323.18	3296.28	3278.15	3241.65	3214.02	3186.26	3158.44	3139.29	3102.78	3075.01	3047.3	3028.07	2992.09
		Human waste	kl	Human waste treatment plant and sludge treatment center	19163	18957	18956	19068.4	18615.4	18547.6	18537.8	18522.5	18502.5	18478.3	18450.5	18419.3	18384.5	18346	18231.3	18113.6	17993	17869.7	17743.9	17615.6	17485	17352.4	17218	17082.1	16944.9	16806.7	16667.9	16528.8	16389.5	16250.3	16111.4	15972.9	15834.7	15696.8
		Human waste	kl	Community plant	19531.9	19491.3	19448.8	19319	19243.6	19162.6	19076.3	18985.4	18890.3	18791.5	18689.2	18583.7	18475	18363.3	18248.5	18130.7	18010	17886.6	17760.6	17632.2	17501.5	17368.8	17234.3	17098.2	16960.9	16822.6	16683.7	16544.4	16405	16265.7	16126.6	15987.9	15849.6	15711.6
					Fiscal Year
					2017	2018	2019	2020	2021	2022	2023	2024	2025	2026	2027	2028	2029	2030	2031	2032	2033	2034	2035	2036	2037	2038	2039	2040	2041	2042	2043	2044	2045	2046	2047	2048	2049	2050
		Power receiving	MWh	Collection	9551.67	19029	28549.5	37690.2	46703.1	55688.4	64537.7	73448.2	81809.2	90242.1	98525.2	106952	114626	122435	130361	138532	145811	153331	160709	168405	175035	181979	188777	195965	201938	208303	214528	220616	227190	232392	238086	243653	249775	261888
		Power receiving	MWh	Residue transportation	3518.75	3411.43	3298.13	3212.06	3224.19	3247.12	3270.03	3303.42	3316.56	3333.56	3350.91	3379	3387.17	3406.32	3418.44	3436.49	3434.78	3441.31	3447.26	3455.21	3444.79	3442.84	3440.55	3446.61	3435.24	3432.4	3429.47	3426.49	3431.79	3420.53	3417.67	3414.88	3420.18	3409.44
		Power receiving	MWh	Incineration facility	2.67776e+06	2.59414e+06	2.51855e+06	2.42863e+06	2.34806e+06	2.26232e+06	2.17912e+06	2.09423e+06	2.00037e+06	1.90823e+06	1.81614e+06	1.72531e+06	1.63723e+06	1.543e+06	1.46025e+06	1.37606e+06	1.29103e+06	1.21775e+06	595170	567361	541715	518656	491424	472915	451999	432509	409503	388888	371173	353009	335060	314911	304063	292589
		Power receiving	MWh	Bulk waste treatment facility	187291	186902	186494	185249	184527	183750	182922	182051	181139	180192	179211	178199	177157	176085	174984	173855	172698	171514	170307	169075	167822	166549	165259	163955	162638	161312	159979	158644	157307	155971	154638	153308	151982	150658
		Power receiving	MWh	Composting facility	89314.8	85742.2	85742.2	85186.5	84386.3	83794.1	83179.1	82772.9	81889.6	81219.3	80533.7	80058.2	79119.8	78392.3	77902.2	77611.4	76884.2	76357.4	75819.7	75477.6	74713.5	74147	73572.7	73191.8	72405.6	71815.2	71222.1	70627.4	70224.1	69437.6	68844.1	68252	67846.9	67072.2
		Power receiving	MWh	Feed production facility	28102.2	28102.2	28102.2	28102.2	28102.2	28102.2	28102.2	28102.2	28102.2	28102.2	28102.2	28102.2	28102.2	28102.2	28102.2	28102.2	28102.2	28102.2	28102.2	28102.2	28102.2	28102.2	28102.2	28102.2	28102.2	28102.2	28102.2	28102.2	28102.2	28102.2	28102.2	28102.2	28102.2	28102.2
		Power receiving	MWh	Other resource recovery facilities	255363	245129	234259	226379	228012	230608	233208	236851	238538	240618	242749	245941	247204	249553	251252	253542	253918	255110	256257	257610	257182	257589	257971	259174	258684	259029	259368	259704	260848	260376	260724	261075	262214	261788
		Power receiving	MWh	Material recycling after incineration	30256.6	30188.6	30594.1	30250.3	29924.2	29671.1	29409.9	29222.7	28867.3	28592.5	28312.4	28106.7	27737.1	27442.2	27245.6	27120	26838.9	26629.2	26415.6	26278.3	25990.5	25773.1	25553	25401.8	25106.1	24880.3	24653.4	24426	24266.9	23971.1	23744.1	23517.7	23357.8	23066.3
		Power receiving	MWh	Refuse fuel production facility	127868	132418	129441	123382	121371	119693	117975	116622	114470	112720	110945	109532	107322	105475	105224	105386	103730	103490	103191	101732	100784	101157	99917.8	99021.1	98658.7	97563.4	98590.7	98238.7	97508.2	95896.5	94625.7	93357.3	92418.9	90827.5
		Power receiving	MWh	Other facilities	19838.1	19838.1	19838.1	19838.1	19838.1	19838.1	19838.1	19838.1	19838.1	19838.1	19838.1	19838.1	19838.1	19838.1	19838.1	19838.1	19838.1	19838.1	19838.1	19838.1	19838.1	19838.1	19838.1	19838.1	19838.1	19838.1	19838.1	19838.1	19838.1	19838.1	19838.1	19838.1	19838.1	19838.1
		Power receiving	MWh	Landfill site	156192	156068	155087	152572	150198	148180	146122	144424	141908	140668	139402	138497	136796	135457	134482	133853	132465	131426	130368	129741	128380	127362	126332	125637	124238	123179	122115	121049	120315	118915	117851	116789	116052	114673
		Power receiving	MWh	Human waste treatment plant and sludge treatment center	954352	934583	928806	926761	903790	894583	888472	883136	877255	871571	865627	862581	860626	861243	853050	847663	842552	834157	825236	819562	810752	802078	794590	788399	779554	772296	762926	754864	746382	737812	729867	722113	715624	711777
		Power receiving	MWh	Community plant	244626	244119	243586	241960	241016	240001	238920	237782	236591	235354	234073	232751	231390	229990	228552	227077	225566	224020	222442	220834	219197	217535	215850	214146	212426	210694	208954	207209	205463	203719	201977	200240	198508	196779
					2017	2018	2019	2020	2021	2022	2023	2024	2025	2026	2027	2028	2029	2030	2031	2032	2033	2034	2035	2036	2037	2038	2039	2040	2041	2042	2043	2044	2045	2046	2047	2048	2049	2050
		Fuel	GJ	Collection	6.19549e+06	5.98986e+06	5.80957e+06	5.57247e+06	5.34582e+06	5.13487e+06	4.92483e+06	4.72903e+06	4.50869e+06	4.30395e+06	4.10094e+06	3.91069e+06	3.70067e+06	3.50361e+06	3.31591e+06	3.13836e+06	2.94532e+06	2.76263e+06	2.58181e+06	2.40953e+06	2.22613e+06	2.05144e+06	1.87898e+06	1.71348e+06	1.54097e+06	1.37557e+06	1.21263e+06	1.05219e+06	896728	738904	586071	435773	288791	0
		Fuel	GJ	Residue transportation	778969	767806	762181	749910	746081	744847	743606	744280	740905	738906	736865	736769	732715	730632	729050	728924	724963	722678	720285	719047	714169	710977	707716	706111	701033	697640	694225	690798	689015	683942	680532	677135	675345	670377
		Fuel	GJ	Incineration facility	1.24978e+07	1.25195e+07	1.27423e+07	1.24481e+07	1.24731e+07	1.2462e+07	1.25342e+07	1.26805e+07	1.27016e+07	1.27353e+07	1.27388e+07	1.27624e+07	1.27643e+07	1.27314e+07	1.27147e+07	1.26874e+07	1.26099e+07	1.25119e+07	1.12076e+07	1.12068e+07	1.11615e+07	1.10891e+07	1.09845e+07	1.12099e+07	1.10765e+07	1.09686e+07	1.08156e+07	1.05931e+07	1.05244e+07	1.03513e+07	1.01424e+07	9.97796e+06	9.93177e+06	9.80945e+06
		Fuel	GJ	Bulk waste treatment facility	165938	165593	165232	164129	163489	162800	162067	161295	160487	159648	158779	157883	156959	156010	155034	154034	153008	151960	150890	149799	148689	147561	146418	145262	144095	142921	141740	140557	139372	138189	137008	135829	134654	133481
		Fuel	GJ	Composting facility	139946	134348	134348	133478	132224	131296	130332	129696	128312	127262	126187	125442	123972	122832	122064	121608	120469	119643	118801	118265	117068	116180	115280	114683	113451	112526	111597	110665	110033	108801	107871	106943	106308	105095
		Fuel	GJ	Feed production facility	42852.1	42852.1	42852.1	42852.1	42852.1	42852.1	42852.1	42852.1	42852.1	42852.1	42852.1	42852.1	42852.1	42852.1	42852.1	42852.1	42852.1	42852.1	42852.1	42852.1	42852.1	42852.1	42852.1	42852.1	42852.1	42852.1	42852.1	42852.1	42852.1	42852.1	42852.1	42852.1	42852.1	42852.1
		Fuel	GJ	Other resource recovery facilities	379234	364036	347894	336191	338616	342472	346333	351744	354249	357338	360502	365242	367118	370606	373129	376530	377089	378859	380562	382571	381936	382540	383108	384894	384166	384679	385182	385682	387380	386680	387196	387718	389409	388777
		Fuel	GJ	Material recycling after incineration	1.20923e+06	1.20651e+06	1.22272e+06	1.20897e+06	1.19594e+06	1.18583e+06	1.17539e+06	1.16791e+06	1.1537e+06	1.14272e+06	1.13153e+06	1.12331e+06	1.10854e+06	1.09675e+06	1.08889e+06	1.08387e+06	1.07264e+06	1.06425e+06	1.05572e+06	1.05023e+06	1.03873e+06	1.03004e+06	1.02124e+06	1.0152e+06	1.00339e+06	994359	985292	976204	969844	958023	948951	939901	933512	921861
		Fuel	GJ	Refuse fuel production facility	1.47868e+06	1.49355e+06	1.49064e+06	1.41067e+06	1.38537e+06	1.36379e+06	1.34175e+06	1.32386e+06	1.29692e+06	1.27706e+06	1.2569e+06	1.24086e+06	1.21574e+06	1.19477e+06	1.19266e+06	1.19464e+06	1.18559e+06	1.18281e+06	1.17982e+06	1.16401e+06	1.14118e+06	1.12373e+06	1.10396e+06	1.0881e+06	1.06573e+06	1.04604e+06	1.03036e+06	1.01143e+06	995398	971330	951168	931036	914687	890859
		Fuel	GJ	Other facilities	7974.31	7974.31	7974.31	7974.31	7974.31	7974.31	7974.31	7974.31	7974.31	7974.31	7974.31	7974.31	7974.31	7974.31	7974.31	7974.31	7974.31	7974.31	7974.31	7974.31	7974.31	7974.31	7974.31	7974.31	7974.31	7974.31	7974.31	7974.31	7974.31	7974.31	7974.31	7974.31	7974.31	7974.31
		Fuel	GJ	Landfill site	331146	330884	328803	323470	318439	314159	309796	306196	300861	298233	295548	293630	290023	287186	285118	283784	280843	278639	276396	275066	272181	270024	267838	266365	263399	261154	258899	256638	255082	252115	249858	247607	246044	243121
		Fuel	GJ	Human waste treatment plant and sludge treatment center	2.14499e+06	2.09961e+06	2.06335e+06	2.03987e+06	1.98384e+06	1.94569e+06	1.9084e+06	1.87156e+06	1.83841e+06	1.80198e+06	1.7721e+06	1.73687e+06	1.7079e+06	1.68102e+06	1.64598e+06	1.6109e+06	1.57782e+06	1.54059e+06	1.50469e+06	1.48018e+06	1.44528e+06	1.41297e+06	1.37687e+06	1.35002e+06	1.32411e+06	1.29119e+06	1.26033e+06	1.22724e+06	1.20435e+06	1.16701e+06	1.14635e+06	1.12698e+06	1.10455e+06	1.08958e+06
		Fuel	GJ	Community plant	118.654	117.378	117.372	118.068	115.263	114.843	114.783	114.688	114.564	114.414	114.242	114.049	113.833	113.595	112.884	112.156	111.409	110.646	109.867	109.072	108.264	107.443	106.611	105.769	104.92	104.064	103.205	102.343	101.48	100.619	99.7588	98.9008	98.0451	97.1912
		Electric power transmission	MWh	Incineration facility	5.10019e+06	5.17392e+06	5.60367e+06	5.7306e+06	5.83882e+06	5.97816e+06	6.1185e+06	6.28008e+06	6.38918e+06	6.53146e+06	6.66538e+06	6.80598e+06	6.88019e+06	6.97451e+06	7.09595e+06	7.24678e+06	7.34393e+06	7.42623e+06	8.29144e+06	8.33397e+06	8.3078e+06	8.28629e+06	8.27566e+06	8.28228e+06	8.21786e+06	8.17699e+06	8.14529e+06	8.0935e+06	8.06392e+06	7.97799e+06	7.91545e+06	7.85256e+06	7.80059e+06	7.68332e+06
		Electric power transmission	MWh	Methane fermentation facility	0	4415.98	729.043	1887.48	2126.18	2380.92	2635.81	2899.24	3138.63	3094.99	3051.37	3016.93	2964.24	2920.73	2827.2	2814.02	3080.38	3080.34	2978.94	3786.05	4355.12	5106.89	5294.91	5484.53	6112.4	6404.45	3791.65	4305.14	4567.17	4754.76	4943.59	5132.36	5322.29	5509.71
		External heat supply	GJ	External heat supply	3.05045e+06	2.97521e+06	3.01616e+06	2.9747e+06	2.91679e+06	2.88449e+06	2.84645e+06	2.83092e+06	2.79191e+06	2.76822e+06	2.72728e+06	2.72769e+06	2.66404e+06	2.60751e+06	2.59069e+06	2.60678e+06	2.56171e+06	2.55102e+06	2.79233e+06	2.7725e+06	2.74505e+06	2.73053e+06	2.64132e+06	2.63207e+06	2.60709e+06	2.58512e+06	2.57556e+06	2.5671e+06	2.53963e+06	2.51331e+06	2.50087e+06	2.49253e+06	2.48491e+06	2.45317e+06
					2017	2018	2019	2020	2021	2022	2023	2024	2025	2026	2027	2028	2029	2030	2031	2032	2033	2034	2035	2036	2037	2038	2039	2040	2041	2042	2043	2044	2045	2046	2047	2048	2049	2050
		Power receiving	GWh	Collection	9.55167	19.029	28.5495	37.6902	46.7031	55.6884	64.5377	73.4482	81.8092	90.2421	98.5252	106.952	114.626	122.435	130.361	138.532	145.811	153.331	160.709	168.405	175.035	181.979	188.777	195.965	201.938	208.303	214.528	220.616	227.19	232.392	238.086	243.653	249.775	261.888
		Power receiving	GWh	Residue transportation	3.51875	3.41143	3.29813	3.21206	3.22419	3.24712	3.27003	3.30342	3.31656	3.33356	3.35091	3.379	3.38717	3.40632	3.41844	3.43649	3.43478	3.44131	3.44726	3.45521	3.44479	3.44284	3.44055	3.44661	3.43524	3.4324	3.42947	3.42649	3.43179	3.42053	3.41767	3.41488	3.42018	3.40944
		Power receiving	GWh	Incineration facility	2677.76	2594.14	2518.55	2428.63	2348.06	2262.32	2179.12	2094.23	2000.37	1908.23	1816.14	1725.31	1637.23	1543	1460.25	1376.06	1291.03	1217.75	595.17	567.361	541.715	518.656	491.424	472.915	451.999	432.509	409.503	388.888	371.173	353.009	335.06	314.911	304.063	292.589
		Power receiving	GWh	Bulk waste treatment facility	187.291	186.902	186.494	185.249	184.527	183.75	182.922	182.051	181.139	180.192	179.211	178.199	177.157	176.085	174.984	173.855	172.698	171.514	170.307	169.075	167.822	166.549	165.259	163.955	162.638	161.312	159.979	158.644	157.307	155.971	154.638	153.308	151.982	150.658
		Power receiving	GWh	Composting facility	89.3148	85.7422	85.7422	85.1865	84.3863	83.7941	83.1791	82.7729	81.8896	81.2193	80.5337	80.0582	79.1198	78.3923	77.9022	77.6114	76.8842	76.3574	75.8197	75.4776	74.7135	74.147	73.5727	73.1918	72.4056	71.8152	71.2221	70.6274	70.2241	69.4376	68.8441	68.252	67.8469	67.0722
		Power receiving	GWh	Feed production facility	28.1022	28.1022	28.1022	28.1022	28.1022	28.1022	28.1022	28.1022	28.1022	28.1022	28.1022	28.1022	28.1022	28.1022	28.1022	28.1022	28.1022	28.1022	28.1022	28.1022	28.1022	28.1022	28.1022	28.1022	28.1022	28.1022	28.1022	28.1022	28.1022	28.1022	28.1022	28.1022	28.1022	28.1022
		Power receiving	GWh	Other resource recovery facilities	255.363	245.129	234.259	226.379	228.012	230.608	233.208	236.851	238.538	240.618	242.749	245.941	247.204	249.553	251.252	253.542	253.918	255.11	256.257	257.61	257.182	257.589	257.971	259.174	258.684	259.029	259.368	259.704	260.848	260.376	260.724	261.075	262.214	261.788
		Power receiving	GWh	Material recycling after incineration	30.2566	30.1886	30.5941	30.2503	29.9242	29.6711	29.4099	29.2227	28.8673	28.5925	28.3124	28.1067	27.7371	27.4422	27.2456	27.12	26.8389	26.6292	26.4156	26.2783	25.9905	25.7731	25.553	25.4018	25.1061	24.8803	24.6534	24.426	24.2669	23.9711	23.7441	23.5177	23.3578	23.0663
		Power receiving	GWh	Refuse fuel production facility	127.868	132.418	129.441	123.382	121.371	119.693	117.975	116.622	114.47	112.72	110.945	109.532	107.322	105.475	105.224	105.386	103.73	103.49	103.191	101.732	100.784	101.157	99.9178	99.0211	98.6587	97.5634	98.5907	98.2387	97.5082	95.8965	94.6257	93.3573	92.4189	90.8275
		Power receiving	GWh	Other facilities	19.8381	19.8381	19.8381	19.8381	19.8381	19.8381	19.8381	19.8381	19.8381	19.8381	19.8381	19.8381	19.8381	19.8381	19.8381	19.8381	19.8381	19.8381	19.8381	19.8381	19.8381	19.8381	19.8381	19.8381	19.8381	19.8381	19.8381	19.8381	19.8381	19.8381	19.8381	19.8381	19.8381	19.8381
		Power receiving	GWh	Landfill site	156.192	156.068	155.087	152.572	150.198	148.18	146.122	144.424	141.908	140.668	139.402	138.497	136.796	135.457	134.482	133.853	132.465	131.426	130.368	129.741	128.38	127.362	126.332	125.637	124.238	123.179	122.115	121.049	120.315	118.915	117.851	116.789	116.052	114.673
		Power receiving	GWh	Human waste treatment plant and sludge treatment center	954.352	934.583	928.806	926.761	903.79	894.583	888.472	883.136	877.255	871.571	865.627	862.581	860.626	861.243	853.05	847.663	842.552	834.157	825.236	819.562	810.752	802.078	794.59	788.399	779.554	772.296	762.926	754.864	746.382	737.812	729.867	722.113	715.624	711.777
		Power receiving	GWh	Community plant	244.626	244.119	243.586	241.96	241.016	240.001	238.92	237.782	236.591	235.354	234.073	232.751	231.39	229.99	228.552	227.077	225.566	224.02	222.442	220.834	219.197	217.535	215.85	214.146	212.426	210.694	208.954	207.209	205.463	203.719	201.977	200.24	198.508	196.779
		Fuel	GWh	Collection	1720.97	1663.85	1613.77	1547.91	1484.95	1426.35	1368.01	1313.62	1252.41	1195.54	1139.15	1086.3	1027.96	973.226	921.086	871.765	818.145	767.398	717.171	669.314	618.369	569.846	521.938	475.966	428.048	382.102	336.841	292.275	249.091	205.251	162.797	121.048	80.2196	0
		Fuel	GWh	Residue transportation	216.38	213.28	211.717	208.308	207.245	206.902	206.557	206.744	205.807	205.252	204.685	204.658	203.532	202.953	202.514	202.479	201.379	200.744	200.079	199.735	198.38	197.494	196.588	196.142	194.731	193.789	192.84	191.888	191.393	189.984	189.037	188.093	187.596	186.216
		Fuel	GWh	Incineration facility	3471.62	3477.65	3539.52	3457.8	3464.76	3461.66	3481.71	3522.36	3528.21	3537.6	3538.56	3545.1	3545.63	3536.49	3531.85	3524.28	3502.74	3475.54	3113.23	3112.99	3100.42	3080.3	3051.25	3113.87	3076.81	3046.85	3004.34	2942.53	2923.43	2875.37	2817.34	2771.66	2758.83	2724.85
		Fuel	GWh	Bulk waste treatment facility	46.0939	45.9982	45.8978	45.5914	45.4137	45.2223	45.0187	44.8042	44.5798	44.3466	44.1053	43.8563	43.5998	43.3361	43.0651	42.7871	42.5023	42.2111	41.9139	41.6108	41.3024	40.9892	40.6717	40.3506	40.0265	39.7002	39.3723	39.0435	38.7145	38.3858	38.0577	37.7304	37.4039	37.0782
		Fuel	GWh	Composting facility	38.874	37.319	37.319	37.0772	36.7289	36.4711	36.2034	36.0266	35.6422	35.3504	35.052	34.8451	34.4366	34.12	33.9067	33.7801	33.4636	33.2343	33.0003	32.8514	32.5188	32.2722	32.0223	31.8565	31.5143	31.2573	30.9992	30.7403	30.5648	30.2225	29.9642	29.7065	29.5301	29.193
		Fuel	GWh	Feed production facility	11.9034	11.9034	11.9034	11.9034	11.9034	11.9034	11.9034	11.9034	11.9034	11.9034	11.9034	11.9034	11.9034	11.9034	11.9034	11.9034	11.9034	11.9034	11.9034	11.9034	11.9034	11.9034	11.9034	11.9034	11.9034	11.9034	11.9034	11.9034	11.9034	11.9034	11.9034	11.9034	11.9034	11.9034
		Fuel	GWh	Other resource recovery facilities	105.343	101.121	96.6371	93.3864	94.06	95.1312	96.2035	97.7065	98.4024	99.2605	100.139	101.456	101.977	102.946	103.647	104.592	104.747	105.239	105.712	106.27	106.093	106.261	106.419	106.915	106.713	106.855	106.995	107.134	107.606	107.411	107.554	107.699	108.169	107.994
		Fuel	GWh	Material recycling after incineration	335.896	335.141	339.643	335.826	332.206	329.397	326.497	324.419	320.473	317.423	314.313	312.029	307.926	304.652	302.469	301.075	297.954	295.626	293.255	291.731	288.536	286.122	283.679	282.001	278.718	276.211	273.692	271.168	269.401	266.117	263.598	261.083	259.309	256.072
		Fuel	GWh	Refuse fuel production facility	410.745	414.876	414.068	391.852	384.826	378.83	372.709	367.738	360.255	354.738	349.138	344.683	337.707	331.879	331.293	331.844	329.331	328.56	327.727	323.337	316.994	312.148	306.655	302.249	296.037	290.567	286.212	280.953	276.499	269.814	264.213	258.621	254.08	247.461
		Fuel	GWh	Other facilities	2.21509	2.21509	2.21509	2.21509	2.21509	2.21509	2.21509	2.21509	2.21509	2.21509	2.21509	2.21509	2.21509	2.21509	2.21509	2.21509	2.21509	2.21509	2.21509	2.21509	2.21509	2.21509	2.21509	2.21509	2.21509	2.21509	2.21509	2.21509	2.21509	2.21509	2.21509	2.21509	2.21509	2.21509
		Fuel	GWh	Landfill site	91.9851	91.9121	91.3342	89.8529	88.4552	87.2665	86.0545	85.0545	83.5726	82.8424	82.0967	81.564	80.5621	79.7739	79.1994	78.8288	78.0118	77.3998	76.7767	76.4071	75.6058	75.0066	74.3995	73.9902	73.1663	72.5427	71.9163	71.2883	70.8561	70.0319	69.4051	68.7798	68.3456	67.5336
		Fuel	GWh	Human waste treatment plant and sludge treatment center	595.83	583.226	573.153	566.629	551.068	540.471	530.111	519.878	510.668	500.549	492.249	482.463	474.416	466.951	457.217	447.473	438.284	427.941	417.97	411.162	401.468	392.491	382.465	375.005	367.808	358.664	350.093	340.899	334.543	324.168	318.431	313.051	306.82	302.66
		Fuel	GWh	Community plant	0.0329593	0.032605	0.0326033	0.0327966	0.0320175	0.0319008	0.031884	0.0318577	0.0318232	0.0317817	0.0317339	0.0316802	0.0316204	0.0315541	0.0313568	0.0311544	0.030947	0.030735	0.0305185	0.0302979	0.0300733	0.0298452	0.0296141	0.0293803	0.0291443	0.0289067	0.0286679	0.0284286	0.028189	0.0279497	0.0277108	0.0274724	0.0272347	0.0269976
					2017	2018	2019	2020	2021	2022	2023	2024	2025	2026	2027	2028	2029	2030	2031	2032	2033	2034	2035	2036	2037	2038	2039	2040	2041	2042	2043	2044	2045	2046	2047	2048	2049	2050
		Power receiving+Fuel	GWh	Collection	1730.52	1682.88	1642.32	1585.6	1531.65	1482.04	1432.55	1387.07	1334.22	1285.78	1237.68	1193.25	1142.59	1095.66	1051.45	1010.3	963.956	920.728	877.88	837.719	793.404	751.825	710.715	671.931	629.986	590.405	551.369	512.891	476.282	437.643	400.883	364.701	329.995	261.888
		Power receiving+Fuel	GWh	Residue transportation	219.899	216.691	215.015	211.52	210.469	210.149	209.827	210.048	209.123	208.585	208.036	208.037	206.919	206.36	205.932	205.915	204.813	204.185	203.526	203.19	201.825	200.937	200.028	199.589	198.167	197.221	196.27	195.315	194.825	193.404	192.454	191.508	191.016	189.625
		Power receiving+Fuel	GWh	Incineration facility	6149.38	6071.79	6058.07	5886.43	5812.82	5723.98	5660.83	5616.59	5528.58	5445.83	5354.7	5270.42	5182.86	5079.49	4992.11	4900.34	4793.77	4693.29	3708.4	3680.35	3642.14	3598.95	3542.68	3586.78	3528.81	3479.35	3413.85	3331.41	3294.61	3228.38	3152.4	3086.57	3062.89	3017.43
		Power receiving+Fuel	GWh	Bulk waste treatment facility	233.385	232.9	232.392	230.841	229.941	228.972	227.941	226.855	225.719	224.538	223.316	222.055	220.757	219.421	218.049	216.642	215.2	213.725	212.22	210.686	209.124	207.538	205.931	204.305	202.664	201.012	199.352	197.687	196.021	194.357	192.696	191.039	189.386	187.736
		Power receiving+Fuel	GWh	Composting facility	425.211	420.883	425.385	421.013	416.593	413.191	409.676	407.192	402.362	398.642	394.847	392.088	387.046	383.045	380.372	378.687	374.838	371.984	369.075	367.208	363.249	360.269	357.252	355.192	351.124	348.026	344.914	341.795	339.625	335.555	332.442	329.336	327.156	323.145
		Power receiving+Fuel	GWh	Feed production facility	438.847	442.978	442.17	419.954	412.928	406.933	400.811	395.84	388.358	382.84	377.241	372.785	365.809	359.982	359.396	359.947	357.433	356.662	355.829	351.439	345.096	340.25	334.757	330.352	324.139	318.67	314.314	309.055	304.602	297.916	292.316	286.723	282.182	275.563
		Power receiving+Fuel	GWh	Other resource recovery facilities	257.578	247.344	236.474	228.594	230.227	232.823	235.423	239.066	240.753	242.833	244.964	248.156	249.419	251.768	253.467	255.757	256.133	257.325	258.472	259.825	259.397	259.804	260.186	261.389	260.899	261.244	261.583	261.919	263.063	262.591	262.939	263.29	264.429	264.003
		Power receiving+Fuel	GWh	Material recycling after incineration	122.242	122.101	121.928	120.103	118.379	116.938	115.464	114.277	112.44	111.435	110.409	109.671	108.299	107.216	106.445	105.949	104.851	104.029	103.192	102.685	101.596	100.78	99.9525	99.392	98.2724	97.423	96.5697	95.7143	95.123	94.003	93.1492	92.2974	91.7034	90.5998
		Power receiving+Fuel	GWh	Refuse fuel production facility	538.612	547.293	543.509	515.234	506.197	498.523	490.684	484.36	474.725	467.459	460.083	454.215	445.029	437.355	436.517	437.23	433.061	432.049	430.918	425.069	417.778	413.305	406.572	401.27	394.695	388.131	384.803	379.191	374.008	365.71	358.839	351.978	346.499	338.288
		Power receiving+Fuel	GWh	Other facilities	22.0532	22.0532	22.0532	22.0532	22.0532	22.0532	22.0532	22.0532	22.0532	22.0532	22.0532	22.0532	22.0532	22.0532	22.0532	22.0532	22.0532	22.0532	22.0532	22.0532	22.0532	22.0532	22.0532	22.0532	22.0532	22.0532	22.0532	22.0532	22.0532	22.0532	22.0532	22.0532	22.0532	22.0532
		Power receiving+Fuel	GWh	Landfill site	248.177	247.98	246.421	242.424	238.654	235.446	232.176	229.479	225.48	223.51	221.498	220.061	217.358	215.231	213.681	212.681	210.477	208.826	207.145	206.148	203.986	202.369	200.731	199.627	197.404	195.721	194.031	192.337	191.171	188.947	187.256	185.569	184.398	182.207
		Power receiving+Fuel	GWh	Human waste treatment plant and sludge treatment center	1550.18	1517.81	1501.96	1493.39	1454.86	1435.05	1418.58	1403.01	1387.92	1372.12	1357.88	1345.04	1335.04	1328.19	1310.27	1295.14	1280.84	1262.1	1243.21	1230.72	1212.22	1194.57	1177.05	1163.4	1147.36	1130.96	1113.02	1095.76	1080.92	1061.98	1048.3	1035.16	1022.44	1014.44
		Power receiving+Fuel	GWh	Community plant	244.659	244.151	243.618	241.993	241.048	240.033	238.952	237.814	236.623	235.385	234.104	232.783	231.422	230.022	228.584	227.108	225.597	224.051	222.473	220.864	219.227	217.565	215.88	214.176	212.455	210.723	208.983	207.238	205.491	203.747	202.005	200.268	198.535	196.806
				Energy supply (electricity and heat)	-5947.54	-6004.78	-6442.22	-6558.8	-6651.17	-6781.79	-6911.82	-7069.35	-7167.85	-7303.51	-7426.01	-7566.69	-7623.17	-7701.74	-7818.42	-7973.7	-8058.59	-8137.93	-9070.06	-9107.89	-9074.67	-9049.88	-9014.66	-9018.89	-8948.17	-8901.48	-8864.51	-8810.89	-8773.94	-8680.89	-8615.08	-8550.07	-8496.16	-8370.27
				Energy balance	6233.21	6012.07	5489.1	5060.35	4774.65	4464.35	4183.15	3904.31	3620.52	3317.51	3020.8	2723.93	2491.44	2234.05	1959.9	1654.05	1384.43	1133.07	-855.676	-989.932	-1083.57	-1179.67	-1280.87	-1309.43	-1380.14	-1460.54	-1563.4	-1668.52	-1736.14	-1794.6	-1877.36	-1949.57	-1983.48	-2006.48
		Electric power transmission	GWh	Incineration facility	5100.19	5173.92	5603.67	5730.6	5838.82	5978.16	6118.5	6280.08	6389.18	6531.46	6665.38	6805.98	6880.19	6974.51	7095.95	7246.78	7343.93	7426.23	8291.44	8333.97	8307.8	8286.29	8275.66	8282.28	8217.86	8176.99	8145.29	8093.5	8063.92	7977.99	7915.45	7852.56	7800.59	7683.32
		Electric power transmission	GWh	Methane fermentation facility	0	4.41598	0.729043	1.88748	2.12618	2.38092	2.63581	2.89924	3.13863	3.09499	3.05137	3.01693	2.96424	2.92073	2.8272	2.81402	3.08038	3.08034	2.97894	3.78605	4.35512	5.10689	5.29491	5.48453	6.1124	6.40445	3.79165	4.30514	4.56717	4.75476	4.94359	5.13236	5.32229	5.50971
		External heat supply	GWh	External heat supply	847.348	826.448	837.821	826.306	810.219	801.247	790.681	786.368	775.53	768.95	757.577	757.691	740.011	724.309	719.636	724.106	711.586	708.617	775.647	770.138	762.513	758.482	733.701	731.13	724.191	718.088	715.433	713.084	705.453	698.141	694.685	692.37	690.253	681.437

## Sheet: Expanded planning
					Fiscal Year
					2017	2018	2019	2020	2021	2022	2023	2024	2025	2026	2027	2028	2029	2030	2031	2032	2033	2034	2035	2036	2037	2038	2039	2040	2041	2042	2043	2044	2045	2046	2047	2048	2049	2050
		Waste	kt	Collection	37007	36862.9	36870.7	36506.8	36189.3	35959.9	35720.7	35571	35218	34963.5	34702.4	34531.3	34162.1	33883.2	33671.3	33545.6	33231.3	33003.6	32771.2	32623.4	32293.1	32048.2	31800	31635.4	31295.5	31040.4	30784	30527	30352.7	30012.7	29756.2	29500.3	29325.1	28990.3
		Waste	kt	Incineration facility	34247	34170	34629	34239.8	33870.8	33584.3	33288.6	33076.8	32674.4	32363.5	32046.4	31813.6	31395.3	31061.4	30838.9	30666.3	30315.2	30047	29776.8	29591.8	29233.5	28958.1	28685.1	28492.6	28130.6	27853.1	27575.3	27296.6	27099.9	26744.3	26470.8	26197.4	25996.9	25641
		Waste	kt	Bulk waste treatment facility	1749.87	1746.23	1742.42	1730.79	1724.04	1716.78	1709.05	1700.9	1692.39	1683.53	1674.37	1664.92	1655.18	1645.17	1634.88	1624.33	1613.52	1602.46	1591.18	1579.67	1567.97	1556.08	1544.02	1531.83	1519.53	1507.14	1494.69	1482.21	1469.72	1457.24	1444.79	1432.36	1419.97	1407.6
		Waste	kt	Composting facility	225	216	216	214.6	212.584	211.093	209.543	208.52	206.295	204.606	202.879	201.681	199.317	197.484	196.25	195.517	193.685	192.358	191.003	190.142	188.217	186.79	185.343	184.383	182.403	180.916	179.421	177.923	176.907	174.926	173.431	171.939	170.919	168.967
		Waste	kt	Feed production facility	12	12	12	12	12	12	12	12	12	12	12	12	12	12	12	12	12	12	12	12	12	12	12	12	12	12	12	12	12	12	12	12	12	12
		Waste	kt	Other resource recovery facilities	2819.1	2704.12	2582.01	2493.74	2512.31	2541.72	2571.19	2612.4	2631.63	2655.28	2679.52	2715.7	2730.2	2756.91	2776.32	2802.39	2806.94	2820.68	2833.91	2849.47	2845.01	2849.95	2854.61	2868.5	2863.35	2867.61	2871.79	2875.95	2889.18	2884.25	2888.53	2892.86	2906.04	2901.62
		Waste	kt	Material recycling after incineration	1225.35	1222.6	1239.02	1225.1	1211.89	1201.64	1191.06	1183.48	1169.09	1157.96	1146.62	1138.29	1123.32	1111.37	1103.41	1098.33	1086.94	1078.45	1069.8	1064.24	1052.58	1043.78	1034.86	1028.74	1016.77	1007.62	998.432	989.223	982.778	970.799	961.607	952.435	945.962	934.155
		Waste	kt	Refuse fuel production facility	796.174	819.334	667.87	629.174	615.36	603.771	591.987	582.599	568.086	549.816	531.417	515.392	494.259	475.506	504.014	536.946	563.748	590.066	617.432	647.317	670.137	689.268	705.914	730.38	745.518	761.65	778.136	789.846	807.559	817.494	829.705	844.423	867.184	875.347
		Waste	kt	Other facilities	61	61	61	61	61	61	61	61	61	61	61	61	61	61	61	61	61	61	61	61	61	61	61	61	61	61	61	61	61	61	61	61	61	61
		Waste	kt	Landfill site	4075.42	4072.18	4046.58	3980.95	3919.03	3866.36	3812.66	3768.36	3702.7	3670.35	3637.31	3613.71	3569.32	3534.4	3508.95	3492.53	3456.33	3429.21	3401.6	3385.23	3349.73	3323.18	3296.28	3278.15	3241.65	3214.02	3186.26	3158.44	3139.29	3102.78	3075.01	3047.3	3028.07	2992.09
		Human waste	kl	Human waste treatment plant and sludge treatment center	19163	18957	18956	19068.4	18615.4	18547.6	18537.8	18522.5	18502.5	18478.3	18450.5	18419.3	18384.5	18346	18231.3	18113.6	17993	17869.7	17743.9	17615.6	17485	17352.4	17218	17082.1	16944.9	16806.7	16667.9	16528.8	16389.5	16250.3	16111.4	15972.9	15834.7	15696.8
		Human waste	kl	Community plant	19531.9	19491.3	19448.8	19319	19243.6	19162.6	19076.3	18985.4	18890.3	18791.5	18689.2	18583.7	18475	18363.3	18248.5	18130.7	18010	17886.6	17760.6	17632.2	17501.5	17368.8	17234.3	17098.2	16960.9	16822.6	16683.7	16544.4	16405	16265.7	16126.6	15987.9	15849.6	15711.6
					Fiscal Year
					2017	2018	2019	2020	2021	2022	2023	2024	2025	2026	2027	2028	2029	2030	2031	2032	2033	2034	2035	2036	2037	2038	2039	2040	2041	2042	2043	2044	2045	2046	2047	2048	2049	2050
		Power receiving	MWh	Collection	9551.67	19029	28549.5	37690.2	46703.1	55688.4	64537.7	73448.2	81809.2	90242.1	98525.2	106952	114626	122435	130361	138532	145811	153331	160709	168405	175035	181979	188777	195965	201938	208303	214528	220616	227190	232392	238086	243653	249775	261888
		Power receiving	MWh	Residue transportation	3470.88	3363.66	3250.46	3164.71	3177.03	3200.15	3223.27	3256.89	3270.26	3287.5	3305.11	3333.45	3341.88	3361.31	3373.71	3392.05	3390.64	3397.47	3403.73	3411.99	3401.89	3400.27	3398.31	3404.7	3393.67	3391.17	3388.58	3385.94	3391.58	3380.66	3378.15	3375.69	3381.33	3370.93
		Power receiving	MWh	Incineration facility	2.67776e+06	2.59414e+06	2.51855e+06	2.42863e+06	2.34806e+06	2.26232e+06	2.17912e+06	2.09423e+06	2.00037e+06	1.90823e+06	1.81614e+06	1.72531e+06	1.63723e+06	1.543e+06	1.45073e+06	1.35612e+06	1.26113e+06	1.17871e+06	530930	498635	469945	444628	415707	393914	370658	348390	322117	299180	278675	258499	238496	215589	199473	186429
		Power receiving	MWh	Bulk waste treatment facility	187291	186902	186494	185249	184527	183750	182922	182051	181139	180192	179211	178199	177157	176085	174984	173855	172698	171514	170307	169075	167822	166549	165259	163955	162638	161312	159979	158644	157307	155971	154638	153308	151982	150658
		Power receiving	MWh	Composting facility	89314.8	85742.2	85742.2	85186.5	84386.3	83794.1	83179.1	82772.9	81889.6	81219.3	80533.7	80058.2	79119.8	78392.3	77902.2	77611.4	76884.2	76357.4	75819.7	75477.6	74713.5	74147	73572.7	73191.8	72405.6	71815.2	71222.1	70627.4	70224.1	69437.6	68844.1	68252	67846.9	67072.2
		Power receiving	MWh	Feed production facility	28102.2	28102.2	28102.2	28102.2	28102.2	28102.2	28102.2	28102.2	28102.2	28102.2	28102.2	28102.2	28102.2	28102.2	28102.2	28102.2	28102.2	28102.2	28102.2	28102.2	28102.2	28102.2	28102.2	28102.2	28102.2	28102.2	28102.2	28102.2	28102.2	28102.2	28102.2	28102.2	28102.2	28102.2
		Power receiving	MWh	Other resource recovery facilities	250694	240470	229610	221761	223412	226028	228648	232314	234023	236127	238282	241499	242789	245164	246890	249208	249614	250835	252012	253395	252999	253438	253852	255087	254630	255008	255380	255750	256927	256489	256869	257254	258426	258033
		Power receiving	MWh	Material recycling after incineration	30256.6	30188.6	30594.1	30250.3	29924.2	29671.1	29409.9	29222.7	28867.3	28592.5	28312.4	28106.7	27737.1	27442.2	27245.6	27120	26838.9	26629.2	26415.6	26278.3	25990.5	25773.1	25553	25401.8	25106.1	24880.3	24653.4	24426	24266.9	23971.1	23744.1	23517.7	23357.8	23066.3
		Power receiving	MWh	Refuse fuel production facility	127868	132418	129441	123382	121371	119693	117975	116622	114470	112720	110945	109532	107322	105475	106424	108797	109015	110742	112360	114035	114569	115359	115260	115902	116016	115864	116198	116150	116402	115610	115189	114938	115437	114543
		Power receiving	MWh	Other facilities	19838.1	19838.1	19838.1	19838.1	19838.1	19838.1	19838.1	19838.1	19838.1	19838.1	19838.1	19838.1	19838.1	19838.1	19838.1	19838.1	19838.1	19838.1	19838.1	19838.1	19838.1	19838.1	19838.1	19838.1	19838.1	19838.1	19838.1	19838.1	19838.1	19838.1	19838.1	19838.1	19838.1	19838.1
		Power receiving	MWh	Landfill site	156192	156068	155087	152572	150198	148180	146122	144424	141908	140668	139402	138497	136796	135457	134482	133853	132465	131426	130368	129741	128380	127362	126332	125637	124238	123179	122115	121049	120315	118915	117851	116789	116052	114673
		Power receiving	MWh	Human waste treatment plant and sludge treatment center	954352	934583	928806	926761	903790	894583	888472	883136	877255	871571	865627	862581	860626	861243	853050	847663	842552	834157	825236	819562	810752	802078	794590	788399	779554	772296	762926	754864	746382	737812	729867	722113	715624	711777
		Power receiving	MWh	Community plant	244626	244119	243586	241960	241016	240001	238920	237782	236591	235354	234073	232751	231390	229990	228552	227077	225566	224020	222442	220834	219197	217535	215850	214146	212426	210694	208954	207209	205463	203719	201977	200240	198508	196779
					2017	2018	2019	2020	2021	2022	2023	2024	2025	2026	2027	2028	2029	2030	2031	2032	2033	2034	2035	2036	2037	2038	2039	2040	2041	2042	2043	2044	2045	2046	2047	2048	2049	2050
		Fuel	GJ	Collection	6.19549e+06	5.98986e+06	5.80957e+06	5.57247e+06	5.34582e+06	5.13487e+06	4.92483e+06	4.72903e+06	4.50869e+06	4.30395e+06	4.10094e+06	3.91069e+06	3.70067e+06	3.50361e+06	3.31591e+06	3.13836e+06	2.94532e+06	2.76263e+06	2.58181e+06	2.40953e+06	2.22613e+06	2.05144e+06	1.87898e+06	1.71348e+06	1.54097e+06	1.37557e+06	1.21263e+06	1.05219e+06	896728	738904	586071	435773	288791	0
		Fuel	GJ	Residue transportation	774516	763362	757747	745506	741694	740478	739257	739952	736598	734621	732604	732532	728503	726446	724941	724555	720303	717747	715112	713625	708461	705009	701546	699778	694460	690888	687304	683696	681793	676546	673009	669485	667550	662347
		Fuel	GJ	Incineration facility	1.24978e+07	1.25195e+07	1.27423e+07	1.24481e+07	1.24731e+07	1.2462e+07	1.25342e+07	1.26805e+07	1.27016e+07	1.27353e+07	1.27388e+07	1.27624e+07	1.27643e+07	1.27314e+07	1.27237e+07	1.27064e+07	1.26383e+07	1.25492e+07	1.12694e+07	1.12767e+07	1.12387e+07	1.11723e+07	1.10732e+07	1.13126e+07	1.11842e+07	1.1081e+07	1.09332e+07	1.07147e+07	1.06525e+07	1.04831e+07	1.02778e+07	1.01181e+07	1.00784e+07	9.96002e+06
		Fuel	GJ	Bulk waste treatment facility	165938	165593	165232	164129	163489	162800	162067	161295	160487	159648	158779	157883	156959	156010	155034	154034	153008	151960	150890	149799	148689	147561	146418	145262	144095	142921	141740	140557	139372	138189	137008	135829	134654	133481
		Fuel	GJ	Composting facility	139946	134348	134348	133478	132224	131296	130332	129696	128312	127262	126187	125442	123972	122832	122064	121608	120469	119643	118801	118265	117068	116180	115280	114683	113451	112526	111597	110665	110033	108801	107871	106943	106308	105095
		Fuel	GJ	Feed production facility	42852.1	42852.1	42852.1	42852.1	42852.1	42852.1	42852.1	42852.1	42852.1	42852.1	42852.1	42852.1	42852.1	42852.1	42852.1	42852.1	42852.1	42852.1	42852.1	42852.1	42852.1	42852.1	42852.1	42852.1	42852.1	42852.1	42852.1	42852.1	42852.1	42852.1	42852.1	42852.1	42852.1	42852.1
		Fuel	GJ	Other resource recovery facilities	372302	357118	340990	329334	331785	335670	339561	345005	347543	350668	353868	358646	360561	364088	366652	370095	370696	372510	374258	376313	375724	376375	376991	378825	378146	378708	379260	379809	381557	380906	381472	382043	383784	383200
		Fuel	GJ	Material recycling after incineration	1.20923e+06	1.20651e+06	1.22272e+06	1.20897e+06	1.19594e+06	1.18583e+06	1.17539e+06	1.16791e+06	1.1537e+06	1.14272e+06	1.13153e+06	1.12331e+06	1.10854e+06	1.09675e+06	1.08889e+06	1.08387e+06	1.07264e+06	1.06425e+06	1.05572e+06	1.05023e+06	1.03873e+06	1.03004e+06	1.02124e+06	1.0152e+06	1.00339e+06	994359	985292	976204	969844	958023	948951	939901	933512	921861
		Fuel	GJ	Refuse fuel production facility	1.47868e+06	1.49355e+06	1.49064e+06	1.41067e+06	1.38537e+06	1.36379e+06	1.34175e+06	1.32386e+06	1.29692e+06	1.27706e+06	1.2569e+06	1.24086e+06	1.21574e+06	1.19477e+06	1.19383e+06	1.1959e+06	1.18559e+06	1.18281e+06	1.17982e+06	1.16401e+06	1.13967e+06	1.11933e+06	1.09883e+06	1.08224e+06	1.05746e+06	1.03663e+06	1.01575e+06	994835	977793	953002	932113	911253	894172	869621
		Fuel	GJ	Other facilities	7974.31	7974.31	7974.31	7974.31	7974.31	7974.31	7974.31	7974.31	7974.31	7974.31	7974.31	7974.31	7974.31	7974.31	7974.31	7974.31	7974.31	7974.31	7974.31	7974.31	7974.31	7974.31	7974.31	7974.31	7974.31	7974.31	7974.31	7974.31	7974.31	7974.31	7974.31	7974.31	7974.31	7974.31
		Fuel	GJ	Landfill site	331146	330884	328803	323470	318439	314159	309796	306196	300861	298233	295548	293630	290023	287186	285118	283784	280843	278639	276396	275066	272181	270024	267838	266365	263399	261154	258899	256638	255082	252115	249858	247607	246044	243121
		Fuel	GJ	Human waste treatment plant and sludge treatment center	2.14499e+06	2.09961e+06	2.06335e+06	2.03987e+06	1.98384e+06	1.94569e+06	1.9084e+06	1.87156e+06	1.83841e+06	1.80198e+06	1.7721e+06	1.73687e+06	1.7079e+06	1.68102e+06	1.62118e+06	1.55963e+06	1.49966e+06	1.43325e+06	1.37342e+06	1.3227e+06	1.26679e+06	1.21376e+06	1.15224e+06	1.10185e+06	1.05133e+06	996780	941764	887850	844725	784467	747217	708487	664632	629517
		Fuel	GJ	Community plant	118.654	117.378	117.372	118.068	115.263	114.843	114.783	114.688	114.564	114.414	114.242	114.049	113.833	113.595	112.884	112.156	111.409	110.646	109.867	109.072	108.264	107.443	106.611	105.769	104.92	104.064	103.205	102.343	101.48	100.619	99.7588	98.9008	98.0451	97.1912
		Electric power transmission	MWh	Incineration facility	5.10019e+06	5.17392e+06	5.60367e+06	5.7306e+06	5.83882e+06	5.97816e+06	6.1185e+06	6.28008e+06	6.38918e+06	6.53146e+06	6.66538e+06	6.80598e+06	6.88019e+06	6.97451e+06	7.18924e+06	7.4425e+06	7.63796e+06	7.81082e+06	8.91862e+06	9.01207e+06	9.02282e+06	9.0294e+06	9.04138e+06	9.08706e+06	9.05116e+06	9.04247e+06	9.04801e+06	9.02314e+06	9.02624e+06	8.96454e+06	8.92669e+06	8.89561e+06	8.89988e+06	8.80099e+06
		Electric power transmission	MWh	Methane fermentation facility	0	4415.98	729.043	1887.48	2126.18	2380.92	2635.81	2899.24	3138.63	3094.99	3051.37	3016.93	2964.24	2920.73	4313.54	9481.15	15804.9	20511.3	25001.7	33271.2	39583.9	45680.3	49684	54652.3	60051.6	64303	67840.4	72051	76178.4	79412.2	82725.2	86439.5	91166.7	94106.6
		External heat supply	GJ	External heat supply	3.05045e+06	2.97521e+06	3.01616e+06	2.9747e+06	2.91679e+06	2.88449e+06	2.84645e+06	2.83092e+06	2.79191e+06	2.76822e+06	2.72728e+06	2.72769e+06	2.66404e+06	2.60751e+06	2.58979e+06	2.60494e+06	2.55884e+06	2.54729e+06	2.78344e+06	2.76487e+06	2.73896e+06	2.72582e+06	2.63738e+06	2.6294e+06	2.60556e+06	2.58447e+06	2.5758e+06	2.56818e+06	2.54143e+06	2.51594e+06	2.50446e+06	2.49714e+06	2.49017e+06	2.45924e+06
					2017	2018	2019	2020	2021	2022	2023	2024	2025	2026	2027	2028	2029	2030	2031	2032	2033	2034	2035	2036	2037	2038	2039	2040	2041	2042	2043	2044	2045	2046	2047	2048	2049	2050
		Power receiving	GWh	Collection	9.55167	19.029	28.5495	37.6902	46.7031	55.6884	64.5377	73.4482	81.8092	90.2421	98.5252	106.952	114.626	122.435	130.361	138.532	145.811	153.331	160.709	168.405	175.035	181.979	188.777	195.965	201.938	208.303	214.528	220.616	227.19	232.392	238.086	243.653	249.775	261.888
		Power receiving	GWh	Residue transportation	3.47088	3.36366	3.25046	3.16471	3.17703	3.20015	3.22327	3.25689	3.27026	3.2875	3.30511	3.33345	3.34188	3.36131	3.37371	3.39205	3.39064	3.39747	3.40373	3.41199	3.40189	3.40027	3.39831	3.4047	3.39367	3.39117	3.38858	3.38594	3.39158	3.38066	3.37815	3.37569	3.38133	3.37093
		Power receiving	GWh	Incineration facility	2677.76	2594.14	2518.55	2428.63	2348.06	2262.32	2179.12	2094.23	2000.37	1908.23	1816.14	1725.31	1637.23	1543	1450.73	1356.12	1261.13	1178.71	530.93	498.635	469.945	444.628	415.707	393.914	370.658	348.39	322.117	299.18	278.675	258.499	238.496	215.589	199.473	186.429
		Power receiving	GWh	Bulk waste treatment facility	187.291	186.902	186.494	185.249	184.527	183.75	182.922	182.051	181.139	180.192	179.211	178.199	177.157	176.085	174.984	173.855	172.698	171.514	170.307	169.075	167.822	166.549	165.259	163.955	162.638	161.312	159.979	158.644	157.307	155.971	154.638	153.308	151.982	150.658
		Power receiving	GWh	Composting facility	89.3148	85.7422	85.7422	85.1865	84.3863	83.7941	83.1791	82.7729	81.8896	81.2193	80.5337	80.0582	79.1198	78.3923	77.9022	77.6114	76.8842	76.3574	75.8197	75.4776	74.7135	74.147	73.5727	73.1918	72.4056	71.8152	71.2221	70.6274	70.2241	69.4376	68.8441	68.252	67.8469	67.0722
		Power receiving	GWh	Feed production facility	28.1022	28.1022	28.1022	28.1022	28.1022	28.1022	28.1022	28.1022	28.1022	28.1022	28.1022	28.1022	28.1022	28.1022	28.1022	28.1022	28.1022	28.1022	28.1022	28.1022	28.1022	28.1022	28.1022	28.1022	28.1022	28.1022	28.1022	28.1022	28.1022	28.1022	28.1022	28.1022	28.1022	28.1022
		Power receiving	GWh	Other resource recovery facilities	250.694	240.47	229.61	221.761	223.412	226.028	228.648	232.314	234.023	236.127	238.282	241.499	242.789	245.164	246.89	249.208	249.614	250.835	252.012	253.395	252.999	253.438	253.852	255.087	254.63	255.008	255.38	255.75	256.927	256.489	256.869	257.254	258.426	258.033
		Power receiving	GWh	Material recycling after incineration	30.2566	30.1886	30.5941	30.2503	29.9242	29.6711	29.4099	29.2227	28.8673	28.5925	28.3124	28.1067	27.7371	27.4422	27.2456	27.12	26.8389	26.6292	26.4156	26.2783	25.9905	25.7731	25.553	25.4018	25.1061	24.8803	24.6534	24.426	24.2669	23.9711	23.7441	23.5177	23.3578	23.0663
		Power receiving	GWh	Refuse fuel production facility	127.868	132.418	129.441	123.382	121.371	119.693	117.975	116.622	114.47	112.72	110.945	109.532	107.322	105.475	106.424	108.797	109.015	110.742	112.36	114.035	114.569	115.359	115.26	115.902	116.016	115.864	116.198	116.15	116.402	115.61	115.189	114.938	115.437	114.543
		Power receiving	GWh	Other facilities	19.8381	19.8381	19.8381	19.8381	19.8381	19.8381	19.8381	19.8381	19.8381	19.8381	19.8381	19.8381	19.8381	19.8381	19.8381	19.8381	19.8381	19.8381	19.8381	19.8381	19.8381	19.8381	19.8381	19.8381	19.8381	19.8381	19.8381	19.8381	19.8381	19.8381	19.8381	19.8381	19.8381	19.8381
		Power receiving	GWh	Landfill site	156.192	156.068	155.087	152.572	150.198	148.18	146.122	144.424	141.908	140.668	139.402	138.497	136.796	135.457	134.482	133.853	132.465	131.426	130.368	129.741	128.38	127.362	126.332	125.637	124.238	123.179	122.115	121.049	120.315	118.915	117.851	116.789	116.052	114.673
		Power receiving	GWh	Human waste treatment plant and sludge treatment center	954.352	934.583	928.806	926.761	903.79	894.583	888.472	883.136	877.255	871.571	865.627	862.581	860.626	861.243	853.05	847.663	842.552	834.157	825.236	819.562	810.752	802.078	794.59	788.399	779.554	772.296	762.926	754.864	746.382	737.812	729.867	722.113	715.624	711.777
		Power receiving	GWh	Community plant	244.626	244.119	243.586	241.96	241.016	240.001	238.92	237.782	236.591	235.354	234.073	232.751	231.39	229.99	228.552	227.077	225.566	224.02	222.442	220.834	219.197	217.535	215.85	214.146	212.426	210.694	208.954	207.209	205.463	203.719	201.977	200.24	198.508	196.779
		Fuel	GWh	Collection	1720.97	1663.85	1613.77	1547.91	1484.95	1426.35	1368.01	1313.62	1252.41	1195.54	1139.15	1086.3	1027.96	973.226	921.086	871.765	818.145	767.398	717.171	669.314	618.369	569.846	521.938	475.966	428.048	382.102	336.841	292.275	249.091	205.251	162.797	121.048	80.2196	0
		Fuel	GWh	Residue transportation	215.143	212.045	210.485	207.085	206.026	205.688	205.349	205.542	204.61	204.061	203.501	203.481	202.362	201.79	201.373	201.265	200.084	199.374	198.642	198.229	196.795	195.836	194.874	194.383	192.905	191.913	190.918	189.916	189.387	187.929	186.947	185.968	185.431	183.985
		Fuel	GWh	Incineration facility	3471.62	3477.65	3539.52	3457.8	3464.76	3461.66	3481.71	3522.36	3528.21	3537.6	3538.56	3545.1	3545.63	3536.49	3534.36	3529.55	3510.65	3485.88	3130.4	3132.43	3121.85	3103.42	3075.88	3142.4	3106.72	3078.07	3037.01	2976.29	2959.03	2911.98	2854.95	2810.6	2799.57	2766.67
		Fuel	GWh	Bulk waste treatment facility	46.0939	45.9982	45.8978	45.5914	45.4137	45.2223	45.0187	44.8042	44.5798	44.3466	44.1053	43.8563	43.5998	43.3361	43.0651	42.7871	42.5023	42.2111	41.9139	41.6108	41.3024	40.9892	40.6717	40.3506	40.0265	39.7002	39.3723	39.0435	38.7145	38.3858	38.0577	37.7304	37.4039	37.0782
		Fuel	GWh	Composting facility	38.874	37.319	37.319	37.0772	36.7289	36.4711	36.2034	36.0266	35.6422	35.3504	35.052	34.8451	34.4366	34.12	33.9067	33.7801	33.4636	33.2343	33.0003	32.8514	32.5188	32.2722	32.0223	31.8565	31.5143	31.2573	30.9992	30.7403	30.5648	30.2225	29.9642	29.7065	29.5301	29.193
		Fuel	GWh	Feed production facility	11.9034	11.9034	11.9034	11.9034	11.9034	11.9034	11.9034	11.9034	11.9034	11.9034	11.9034	11.9034	11.9034	11.9034	11.9034	11.9034	11.9034	11.9034	11.9034	11.9034	11.9034	11.9034	11.9034	11.9034	11.9034	11.9034	11.9034	11.9034	11.9034	11.9034	11.9034	11.9034	11.9034	11.9034
		Fuel	GWh	Other resource recovery facilities	103.417	99.1994	94.7195	91.4816	92.1626	93.2418	94.3226	95.8346	96.5398	97.4077	98.2967	99.6238	100.156	101.136	101.848	102.804	102.971	103.475	103.961	104.531	104.368	104.549	104.72	105.229	105.041	105.197	105.35	105.503	105.988	105.807	105.964	106.123	106.607	106.444
		Fuel	GWh	Material recycling after incineration	335.896	335.141	339.643	335.826	332.206	329.397	326.497	324.419	320.473	317.423	314.313	312.029	307.926	304.652	302.469	301.075	297.954	295.626	293.255	291.731	288.536	286.122	283.679	282.001	278.718	276.211	273.692	271.168	269.401	266.117	263.598	261.083	259.309	256.072
		Fuel	GWh	Refuse fuel production facility	410.745	414.876	414.068	391.852	384.826	378.83	372.709	367.738	360.255	354.738	349.138	344.683	337.707	331.879	331.619	332.195	329.331	328.56	327.727	323.337	316.576	310.925	305.231	300.622	293.738	287.953	282.152	276.343	271.609	264.723	258.92	253.126	248.381	241.561
		Fuel	GWh	Other facilities	2.21509	2.21509	2.21509	2.21509	2.21509	2.21509	2.21509	2.21509	2.21509	2.21509	2.21509	2.21509	2.21509	2.21509	2.21509	2.21509	2.21509	2.21509	2.21509	2.21509	2.21509	2.21509	2.21509	2.21509	2.21509	2.21509	2.21509	2.21509	2.21509	2.21509	2.21509	2.21509	2.21509	2.21509
		Fuel	GWh	Landfill site	91.9851	91.9121	91.3342	89.8529	88.4552	87.2665	86.0545	85.0545	83.5726	82.8424	82.0967	81.564	80.5621	79.7739	79.1994	78.8288	78.0118	77.3998	76.7767	76.4071	75.6058	75.0066	74.3995	73.9902	73.1663	72.5427	71.9163	71.2883	70.8561	70.0319	69.4051	68.7798	68.3456	67.5336
		Fuel	GWh	Human waste treatment plant and sludge treatment center	595.83	583.226	573.153	566.629	551.068	540.471	530.111	519.878	510.668	500.549	492.249	482.463	474.416	466.951	450.327	433.229	416.571	398.126	381.504	367.418	351.885	337.155	320.066	306.071	292.035	276.883	261.601	246.625	234.646	217.908	207.56	196.802	184.62	174.866
		Fuel	GWh	Community plant	0.0329593	0.032605	0.0326033	0.0327966	0.0320175	0.0319008	0.031884	0.0318577	0.0318232	0.0317817	0.0317339	0.0316802	0.0316204	0.0315541	0.0313568	0.0311544	0.030947	0.030735	0.0305185	0.0302979	0.0300733	0.0298452	0.0296141	0.0293803	0.0291443	0.0289067	0.0286679	0.0284286	0.028189	0.0279497	0.0277108	0.0274724	0.0272347	0.0269976
					2017	2018	2019	2020	2021	2022	2023	2024	2025	2026	2027	2028	2029	2030	2031	2032	2033	2034	2035	2036	2037	2038	2039	2040	2041	2042	2043	2044	2045	2046	2047	2048	2049	2050
		Power receiving+Fuel	GWh	Collection	1730.52	1682.88	1642.32	1585.6	1531.65	1482.04	1432.55	1387.07	1334.22	1285.78	1237.68	1193.25	1142.59	1095.66	1051.45	1010.3	963.956	920.728	877.88	837.719	793.404	751.825	710.715	671.931	629.986	590.405	551.369	512.891	476.282	437.643	400.883	364.701	329.995	261.888
		Power receiving+Fuel	GWh	Residue transportation	218.614	215.409	213.736	210.25	209.203	208.889	208.572	208.799	207.881	207.349	206.806	206.815	205.704	205.152	204.746	204.657	203.475	202.772	202.046	201.641	200.197	199.236	198.272	197.787	196.299	195.304	194.306	193.302	192.779	191.31	190.325	189.344	188.812	187.356
		Power receiving+Fuel	GWh	Incineration facility	6149.38	6071.79	6058.07	5886.43	5812.82	5723.98	5660.83	5616.59	5528.58	5445.83	5354.7	5270.42	5182.86	5079.49	4985.09	4885.67	4771.78	4664.59	3661.33	3631.06	3591.79	3548.05	3491.58	3536.31	3477.37	3426.46	3359.12	3275.47	3237.71	3170.48	3093.45	3026.19	2999.04	2953.1
		Power receiving+Fuel	GWh	Bulk waste treatment facility	233.385	232.9	232.392	230.841	229.941	228.972	227.941	226.855	225.719	224.538	223.316	222.055	220.757	219.421	218.049	216.642	215.2	213.725	212.22	210.686	209.124	207.538	205.931	204.305	202.664	201.012	199.352	197.687	196.021	194.357	192.696	191.039	189.386	187.736
		Power receiving+Fuel	GWh	Composting facility	128.189	123.061	123.061	122.264	121.115	120.265	119.382	118.799	117.532	116.57	115.586	114.903	113.556	112.512	111.809	111.391	110.348	109.592	108.82	108.329	107.232	106.419	105.595	105.048	103.92	103.073	102.221	101.368	100.789	99.6602	98.8083	97.9585	97.377	96.2652
		Power receiving+Fuel	GWh	Feed production facility	40.0055	40.0055	40.0055	40.0055	40.0055	40.0055	40.0055	40.0055	40.0055	40.0055	40.0055	40.0055	40.0055	40.0055	40.0055	40.0055	40.0055	40.0055	40.0055	40.0055	40.0055	40.0055	40.0055	40.0055	40.0055	40.0055	40.0055	40.0055	40.0055	40.0055	40.0055	40.0055	40.0055	40.0055
		Power receiving+Fuel	GWh	Other resource recovery facilities	354.112	339.67	324.33	313.243	315.575	319.27	322.971	328.148	330.563	333.535	336.579	341.123	342.944	346.3	348.738	352.013	352.585	354.31	355.972	357.927	357.367	357.986	358.572	360.316	359.67	360.205	360.73	361.253	362.915	362.296	362.833	363.377	365.033	364.478
		Power receiving+Fuel	GWh	Material recycling after incineration	366.153	365.33	370.237	366.076	362.13	359.068	355.907	353.642	349.34	346.015	342.626	340.136	335.664	332.094	329.715	328.195	324.793	322.255	319.671	318.009	314.526	311.896	309.232	307.402	303.824	301.091	298.346	295.594	293.668	290.089	287.342	284.601	282.667	279.139
		Power receiving+Fuel	GWh	Refuse fuel production facility	538.612	547.293	543.509	515.234	506.197	498.523	490.684	484.36	474.725	467.459	460.083	454.215	445.029	437.355	438.043	440.992	438.346	439.302	440.087	437.372	431.145	426.284	420.49	416.525	409.754	403.817	398.351	392.493	388.011	380.333	374.109	368.064	363.818	356.105
		Power receiving+Fuel	GWh	Other facilities	22.0532	22.0532	22.0532	22.0532	22.0532	22.0532	22.0532	22.0532	22.0532	22.0532	22.0532	22.0532	22.0532	22.0532	22.0532	22.0532	22.0532	22.0532	22.0532	22.0532	22.0532	22.0532	22.0532	22.0532	22.0532	22.0532	22.0532	22.0532	22.0532	22.0532	22.0532	22.0532	22.0532	22.0532
		Power receiving+Fuel	GWh	Landfill site	248.177	247.98	246.421	242.424	238.654	235.446	232.176	229.479	225.48	223.51	221.498	220.061	217.358	215.231	213.681	212.681	210.477	208.826	207.145	206.148	203.986	202.369	200.731	199.627	197.404	195.721	194.031	192.337	191.171	188.947	187.256	185.569	184.398	182.207
		Power receiving+Fuel	GWh	Human waste treatment plant and sludge treatment center	1550.18	1517.81	1501.96	1493.39	1454.86	1435.05	1418.58	1403.01	1387.92	1372.12	1357.88	1345.04	1335.04	1328.19	1303.38	1280.89	1259.12	1232.28	1206.74	1186.98	1162.64	1139.23	1114.66	1094.47	1071.59	1049.18	1024.53	1001.49	981.028	955.719	937.427	918.915	900.244	886.643
		Power receiving+Fuel	GWh	Community plant	244.659	244.151	243.618	241.993	241.048	240.033	238.952	237.814	236.623	235.385	234.104	232.783	231.422	230.022	228.584	227.108	225.597	224.051	222.473	220.864	219.227	217.565	215.88	214.176	212.455	210.723	208.983	207.238	205.491	203.747	202.005	200.268	198.535	196.806
				Energy supply (electricity and heat)	-5947.54	-6004.78	-6442.22	-6558.8	-6651.17	-6781.79	-6911.82	-7069.35	-7167.85	-7303.51	-7426.01	-7566.69	-7623.17	-7701.74	-7912.94	-8175.57	-8364.55	-8538.91	-9716.8	-9813.36	-9823.22	-9832.25	-9823.67	-9872.1	-9834.98	-9824.69	-9831.35	-9808.57	-9808.37	-9742.82	-9705.1	-9675.7	-9682.77	-9578.22
				Energy balance	5876.5	5645.55	5119.5	4711	4434.09	4131.81	3858.79	3587.28	3312.8	3016.64	2726.9	2436.17	2211.82	1961.75	1582.4	1157.03	773.189	415.581	-1840.35	-2034.56	-2170.52	-2301.79	-2429.95	-2502.14	-2607.98	-2725.64	-2877.95	-3015.39	-3120.45	-3206.18	-3315.91	-3423.62	-3521.4	-3564.43
		Electric power transmission	GWh	Incineration facility	5100.19	5173.92	5603.67	5730.6	5838.82	5978.16	6118.5	6280.08	6389.18	6531.46	6665.38	6805.98	6880.19	6974.51	7189.24	7442.5	7637.96	7810.82	8918.62	9012.07	9022.82	9029.4	9041.38	9087.06	9051.16	9042.47	9048.01	9023.14	9026.24	8964.54	8926.69	8895.61	8899.88	8800.99
		Electric power transmission	GWh	Methane fermentation facility	0	4.41598	0.729043	1.88748	2.12618	2.38092	2.63581	2.89924	3.13863	3.09499	3.05137	3.01693	2.96424	2.92073	4.31354	9.48115	15.8049	20.5113	25.0017	33.2712	39.5839	45.6803	49.684	54.6523	60.0516	64.303	67.8404	72.051	76.1784	79.4122	82.7252	86.4395	91.1667	94.1066
		External heat supply	GWh	External heat supply	847.348	826.448	837.821	826.306	810.219	801.247	790.681	786.368	775.53	768.95	757.577	757.691	740.011	724.309	719.386	723.594	710.788	707.581	773.178	768.02	760.823	757.173	732.606	730.388	723.766	717.91	715.5	713.383	705.953	698.873	695.683	693.651	691.714	683.122

## Sheet: Innovation
					Fiscal Year
					2017	2018	2019	2020	2021	2022	2023	2024	2025	2026	2027	2028	2029	2030	2031	2032	2033	2034	2035	2036	2037	2038	2039	2040	2041	2042	2043	2044	2045	2046	2047	2048	2049	2050
		Waste	kt	Collection	37007	36862.9	36870.7	36506.8	36189.3	35959.9	35720.7	35571	35218	34963.5	34702.4	34531.3	34162.1	33883.2	33671.3	33545.6	33231.3	33003.6	32771.2	32623.4	32293.1	32048.2	31800	31635.4	31295.5	31040.4	30784	30527	30352.7	30012.7	29756.2	29500.3	29325.1	28990.3
		Waste	kt	Incineration facility	34247	34170	34629	34235	33861.2	33570	33269.5	33052.9	32645.8	32330	32008.2	31770.6	31347.5	31008.9	30473.7	29850.2	29091.3	28396.1	27715.4	27084.1	26322	25627.8	24969.7	24343.7	23604.6	22949.3	22297.2	21614.7	21020.5	20333.5	19685.7	19052.5	18475.8	17819.9
		Waste	kt	Bulk waste treatment facility	1749.87	1746.23	1742.42	1730.79	1724.04	1716.78	1709.05	1700.9	1692.39	1683.53	1674.37	1664.92	1655.18	1645.17	1634.88	1624.33	1613.52	1602.46	1591.18	1579.67	1567.97	1556.08	1544.02	1531.83	1519.53	1507.14	1494.69	1482.21	1469.72	1457.24	1444.79	1432.36	1419.97	1407.6
		Waste	kt	Composting facility	225	216	216	214.6	212.584	211.093	209.543	208.52	206.295	204.606	202.879	201.681	199.317	197.484	196.25	195.517	193.685	192.358	191.003	190.142	188.217	186.79	185.343	184.383	182.403	180.916	179.421	177.923	176.907	174.926	173.431	171.939	170.919	168.967
		Waste	kt	Feed production facility	12	12	12	12	12	12	12	12	12	12	12	12	12	12	12	12	12	12	12	12	12	12	12	12	12	12	12	12	12	12	12	12	12	12
		Waste	kt	Other resource recovery facilities	2819.1	2704.12	2582.01	2498.94	2522.7	2557.32	2591.99	2638.41	2662.85	2691.74	2721.23	2762.69	2782.5	2814.57	3150.19	3523.04	3819.5	4154.23	4489.49	4855.88	5147.62	5477.98	5809.79	6180.39	6478.17	6815.82	7156.55	7501.41	7885.09	8202.22	8560.83	8925.48	9330.07	9669.78
		Waste	kt	Material recycling after incineration	1225.35	1222.6	1239.02	1224.93	1211.55	1201.13	1190.38	1182.63	1168.06	1156.77	1145.25	1136.75	1121.61	1109.49	1090.35	1073.12	1051.7	1032.21	1012.62	995.194	973.735	954.176	934.554	916.782	895.209	875.516	855.815	836.098	818.264	796.76	777.113	757.472	739.671	718.351
		Waste	kt	Refuse fuel production facility	796.174	819.334	667.87	628.937	614.886	603.061	591.041	581.416	566.666	548.159	529.524	513.262	491.893	472.903	613.069	773.177	919.558	1050.63	1192.43	1352.09	1493.02	1597.99	1722.43	1855.65	1953.74	2050.28	2176.83	2267.6	2350.41	2442.37	2521.72	2595.92	2652.79	2672.8
		Waste	kt	Other facilities	61	61	61	61	61	61	61	61	61	61	61	61	61	61	61	61	61	61	61	61	61	61	61	61	61	61	61	61	61	61	61	61	61	61
		Waste	kt	Landfill site	4075.42	4072.18	4046.58	3980.71	3918.55	3865.64	3811.71	3767.16	3701.27	3668.68	3635.4	3611.56	3566.93	3531.77	3490.69	3457.32	3407.1	3364.62	3321.73	3288.78	3239.58	3198.01	3156.15	3121.74	3071.83	3029.47	2987.02	2944.52	2909.46	2859.64	2817.26	2774.93	2739.87	2690.6
		Human waste	kl	Human waste treatment plant and sludge treatment center	19163	18957	18956	19068.4	18615.4	18547.6	18537.8	18522.5	18502.5	18478.3	18450.5	18419.3	18384.5	18346	18231.3	18113.6	17993	17869.7	17743.9	17615.6	17485	17352.4	17218	17082.1	16944.9	16806.7	16667.9	16528.8	16389.5	16250.3	16111.4	15972.9	15834.7	15696.8
		Human waste	kl	Community plant	19531.9	19491.3	19448.8	19319	19243.6	19162.6	19076.3	18985.4	18890.3	18791.5	18689.2	18583.7	18475	18363.3	18248.5	18130.7	18010	17886.6	17760.6	17632.2	17501.5	17368.8	17234.3	17098.2	16960.9	16822.6	16683.7	16544.4	16405	16265.7	16126.6	15987.9	15849.6	15711.6
					Fiscal Year
					2017	2018	2019	2020	2021	2022	2023	2024	2025	2026	2027	2028	2029	2030	2031	2032	2033	2034	2035	2036	2037	2038	2039	2040	2041	2042	2043	2044	2045	2046	2047	2048	2049	2050
		Power receiving	MWh	Collection	9551.67	19029	28549.5	37690.2	46703.1	55688.4	64537.7	73448.2	81809.2	90242.1	98525.2	106952	114626	122435	130361	138532	145811	153331	160709	168405	175035	181979	188777	195965	201938	208303	214528	220616	227190	232392	238086	243653	249775	261888
		Power receiving	MWh	Residue transportation	3472.04	3365.95	3253.87	3173.92	3192.07	3221.04	3250	3289.49	3308.7	3331.79	3355.27	3389.54	3403.84	3429.22	3731.56	4067.84	4334.2	4635.48	4937.18	5267.33	5529.12	5826.21	6124.61	6458.51	6725.73	7029.49	7336.11	7646.52	7992.58	8277.74	8600.98	8929.83	9295.39	9603.28
		Power receiving	MWh	Incineration facility	2.67776e+06	2.59414e+06	2.51855e+06	2.42859e+06	2.34823e+06	2.26268e+06	2.17968e+06	2.09498e+06	2.0013e+06	1.90935e+06	1.81743e+06	1.72675e+06	1.63882e+06	1.54473e+06	1.46512e+06	1.3833e+06	1.30153e+06	1.23268e+06	596903	572121	551102	534090	513386	499727	472860	447004	416235	389411	378849	360119	341906	320398	318970	302468
		Power receiving	MWh	Bulk waste treatment facility	187291	186902	186494	185249	184527	183750	182922	182051	181139	180192	179211	178199	177157	176085	174984	173855	172698	171514	170307	169075	167822	166549	165259	163955	162638	161312	159979	158644	157307	155971	154638	153308	151982	150658
		Power receiving	MWh	Composting facility	89314.8	85742.2	85742.2	85186.5	84386.3	83794.1	83179.1	82772.9	81889.6	81219.3	80533.7	80058.2	79119.8	78392.3	77902.2	77611.4	76884.2	76357.4	75819.7	75477.6	74713.5	74147	73572.7	73191.8	72405.6	71815.2	71222.1	70627.4	70224.1	69437.6	68844.1	68252	67846.9	67072.2
		Power receiving	MWh	Feed production facility	28102.2	28102.2	28102.2	28102.2	28102.2	28102.2	28102.2	28102.2	28102.2	28102.2	28102.2	28102.2	28102.2	28102.2	28102.2	28102.2	28102.2	28102.2	28102.2	28102.2	28102.2	28102.2	28102.2	28102.2	28102.2	28102.2	28102.2	28102.2	28102.2	28102.2	28102.2	28102.2	28102.2	28102.2
		Power receiving	MWh	Other resource recovery facilities	250694	240470	229610	222224	224337	227415	230498	234626	236800	239369	241991	245678	247440	250292	280137	313294	339658	369424	399237	431819	457763	487142	516648	549605	576085	606112	636412	667079	701198	729400	761291	793717	829697	859906
		Power receiving	MWh	Material recycling after incineration	30256.6	30188.6	30594.1	30246	29915.8	29658.5	29393	29201.6	28841.9	28563	28278.7	28068.7	27694.9	27395.8	26923	26497.7	25968.7	25487.5	25003.9	24573.5	24043.6	23560.6	23076.1	22637.3	22104.6	21618.3	21131.9	20645.1	20204.7	19673.7	19188.6	18703.6	18264.1	17737.6
		Power receiving	MWh	Refuse fuel production facility	127868	132418	129441	123204	121016	119161	117266	115736	113406	111479	109526	107936	105548	103525	112586	122309	128744	136039	144359	152781	160465	166171	172241	179219	184115	188717	195729	200402	204372	208090	211407	214225	215979	214953
		Power receiving	MWh	Other facilities	19838.1	19838.1	19838.1	19838.1	19838.1	19838.1	19838.1	19838.1	19838.1	19838.1	19838.1	19838.1	19838.1	19838.1	19838.1	19838.1	19838.1	19838.1	19838.1	19838.1	19838.1	19838.1	19838.1	19838.1	19838.1	19838.1	19838.1	19838.1	19838.1	19838.1	19838.1	19838.1	19838.1	19838.1
		Power receiving	MWh	Landfill site	156192	156068	155087	152562	150180	148152	146085	144378	141853	140604	139328	138415	136704	135357	133782	132503	130579	128951	127307	126044	124158	122565	120961	119642	117729	116106	114479	112850	111507	109597	107973	106351	105007	103119
		Power receiving	MWh	Human waste treatment plant and sludge treatment center	954352	934583	928806	926761	903790	894583	888472	883136	877255	871571	865627	862581	860626	861243	842375	825596	808912	787964	768738	751788	733932	716345	697915	681598	662158	645591	625825	608802	591610	573180	558093	542007	526298	513784
		Power receiving	MWh	Community plant	244626	244119	243586	241960	241016	240001	238920	237782	236591	235354	234073	232751	231390	229990	228552	227077	225566	224020	222442	220834	219197	217535	215850	214146	212426	210694	208954	207209	205463	203719	201977	200240	198508	196779
					2017	2018	2019	2020	2021	2022	2023	2024	2025	2026	2027	2028	2029	2030	2031	2032	2033	2034	2035	2036	2037	2038	2039	2040	2041	2042	2043	2044	2045	2046	2047	2048	2049	2050
		Fuel	GJ	Collection	6.19549e+06	5.98986e+06	5.80957e+06	5.57247e+06	5.34582e+06	5.13487e+06	4.92483e+06	4.72903e+06	4.50869e+06	4.30395e+06	4.10094e+06	3.91069e+06	3.70067e+06	3.50361e+06	3.31591e+06	3.13836e+06	2.94532e+06	2.76263e+06	2.58181e+06	2.40953e+06	2.22613e+06	2.05144e+06	1.87898e+06	1.71348e+06	1.54097e+06	1.37557e+06	1.21263e+06	1.05219e+06	896728	738904	586071	435773	288791	0
		Fuel	GJ	Residue transportation	752387	719742	692798	660647	636400	614500	592643	572312	548913	526667	504485	483677	460364	438444	430128	421739	407830	394905	380932	367179	348944	331291	312709	294126	272035	250125	227118	202903	178229	151163	123492	94597.9	64613	0
		Fuel	GJ	Incineration facility	1.24978e+07	1.25195e+07	1.27423e+07	1.24469e+07	1.24708e+07	1.24585e+07	1.25295e+07	1.26746e+07	1.2694e+07	1.27261e+07	1.27279e+07	1.27498e+07	1.275e+07	1.27153e+07	1.25211e+07	1.23013e+07	1.20469e+07	1.17754e+07	1.01905e+07	9.96895e+06	9.72105e+06	9.46182e+06	9.16952e+06	9.14132e+06	8.84447e+06	8.57661e+06	8.25902e+06	7.88382e+06	7.61316e+06	7.29954e+06	6.94702e+06	6.61838e+06	6.38372e+06	6.12868e+06
		Fuel	GJ	Bulk waste treatment facility	165938	165593	165232	164129	163489	162800	162067	161295	160487	159648	158779	157883	156959	156010	155034	154034	153008	151960	150890	149799	148689	147561	146418	145262	144095	142921	141740	140557	139372	138189	137008	135829	134654	133481
		Fuel	GJ	Composting facility	139946	134348	134348	133478	132224	131296	130332	129696	128312	127262	126187	125442	123972	122832	122064	121608	120469	119643	118801	118265	117068	116180	115280	114683	113451	112526	111597	110665	110033	108801	107871	106943	106308	105095
		Fuel	GJ	Feed production facility	42852.1	42852.1	42852.1	42852.1	42852.1	42852.1	42852.1	42852.1	42852.1	42852.1	42852.1	42852.1	42852.1	42852.1	42852.1	42852.1	42852.1	42852.1	42852.1	42852.1	42852.1	42852.1	42852.1	42852.1	42852.1	42852.1	42852.1	42852.1	42852.1	42852.1	42852.1	42852.1	42852.1	42852.1
		Fuel	GJ	Other resource recovery facilities	372302	357118	340990	330020	333159	337730	342308	348439	351667	355482	359377	364852	367468	371704	416026	465267	504419	548625	592900	641287	679816	723445	767264	816208	855533	900125	945124	990666	1.04134e+06	1.08322e+06	1.13058e+06	1.17873e+06	1.23217e+06	1.27703e+06
		Fuel	GJ	Material recycling after incineration	1.20923e+06	1.20651e+06	1.22272e+06	1.20881e+06	1.19561e+06	1.18532e+06	1.17471e+06	1.16707e+06	1.15269e+06	1.14154e+06	1.13018e+06	1.12179e+06	1.10685e+06	1.09489e+06	1.076e+06	1.059e+06	1.03786e+06	1.01863e+06	999298	982097	960920	941618	922255	904716	883427	863993	844551	825095	807495	786274	766886	747503	729937	708897
		Fuel	GJ	Refuse fuel production facility	1.47868e+06	1.49355e+06	1.49064e+06	1.40827e+06	1.38057e+06	1.35658e+06	1.33214e+06	1.31184e+06	1.28251e+06	1.26024e+06	1.23768e+06	1.21924e+06	1.19172e+06	1.16834e+06	1.16633e+06	1.16752e+06	1.15641e+06	1.15283e+06	1.14903e+06	1.13242e+06	1.10729e+06	1.08614e+06	1.06484e+06	1.04745e+06	1.02186e+06	1.00024e+06	978553	956840	938997	913405	891714	870054	852172	826820
		Fuel	GJ	Other facilities	7974.31	7974.31	7974.31	7974.31	7974.31	7974.31	7974.31	7974.31	7974.31	7974.31	7974.31	7974.31	7974.31	7974.31	7974.31	7974.31	7974.31	7974.31	7974.31	7974.31	7974.31	7974.31	7974.31	7974.31	7974.31	7974.31	7974.31	7974.31	7974.31	7974.31	7974.31	7974.31	7974.31	7974.31
		Fuel	GJ	Landfill site	331146	330884	328803	323451	318400	314101	309719	306099	300745	298097	295393	293456	289829	286973	283635	280923	276842	273391	269906	267228	263231	259853	256452	253656	249600	246158	242709	239256	236407	232359	228916	225476	222627	218624
		Fuel	GJ	Human waste treatment plant and sludge treatment center	2.14499e+06	2.09961e+06	2.06335e+06	2.03987e+06	1.98384e+06	1.94569e+06	1.9084e+06	1.87156e+06	1.83841e+06	1.80198e+06	1.7721e+06	1.73687e+06	1.7079e+06	1.68102e+06	1.62118e+06	1.55963e+06	1.49966e+06	1.43325e+06	1.37342e+06	1.3227e+06	1.26679e+06	1.21376e+06	1.15224e+06	1.10185e+06	1.05133e+06	996780	941764	887850	844725	784467	747217	708487	664632	629517
		Fuel	GJ	Community plant	118.654	117.378	117.372	118.068	115.263	114.843	114.783	114.688	114.564	114.414	114.242	114.049	113.833	113.595	112.884	112.156	111.409	110.646	109.867	109.072	108.264	107.443	106.611	105.769	104.92	104.064	103.205	102.343	101.48	100.619	99.7588	98.9008	98.0451	97.1912
		Electric power transmission	MWh	Incineration facility	5.10019e+06	5.17392e+06	5.60367e+06	5.72893e+06	5.83151e+06	5.96496e+06	6.09916e+06	6.25433e+06	6.35671e+06	6.49197e+06	6.61856e+06	6.75154e+06	6.81788e+06	6.90395e+06	6.92319e+06	6.9654e+06	6.97567e+06	6.94156e+06	7.96506e+06	7.80937e+06	7.59127e+06	7.34766e+06	7.10038e+06	6.87762e+06	6.64991e+06	6.43103e+06	6.22322e+06	5.97272e+06	5.67297e+06	5.3683e+06	5.06003e+06	4.72835e+06	4.38936e+06	4.01465e+06
		Electric power transmission	MWh	Methane fermentation facility	0	4415.98	729.043	1928.62	2208.45	2504.33	2800.36	3104.92	3385.46	3382.95	3380.47	3387.17	3375.62	3373.24	24662.7	47673.6	69032.8	87220.8	107910	132485	156062	174085	193011	213297	230300	246092	265767	281433	294621	308808	321229	332448	340344	343133
		External heat supply	GJ	External heat supply	3.05045e+06	2.97521e+06	3.01616e+06	2.97418e+06	2.91453e+06	2.8805e+06	2.84073e+06	2.82344e+06	2.78266e+06	2.75719e+06	2.71449e+06	2.71302e+06	2.64764e+06	2.5894e+06	3.40896e+06	4.26084e+06	5.07433e+06	5.90314e+06	6.9461e+06	7.3484e+06	7.74076e+06	8.12605e+06	8.43849e+06	8.80651e+06	8.39962e+06	7.97428e+06	7.53884e+06	7.10823e+06	7.44616e+06	7.29841e+06	7.14294e+06	6.93834e+06	7.37871e+06	6.77404e+06
					2017	2018	2019	2020	2021	2022	2023	2024	2025	2026	2027	2028	2029	2030	2031	2032	2033	2034	2035	2036	2037	2038	2039	2040	2041	2042	2043	2044	2045	2046	2047	2048	2049	2050
		Power receiving	GWh	Collection	9.55167	19.029	28.5495	37.6902	46.7031	55.6884	64.5377	73.4482	81.8092	90.2421	98.5252	106.952	114.626	122.435	130.361	138.532	145.811	153.331	160.709	168.405	175.035	181.979	188.777	195.965	201.938	208.303	214.528	220.616	227.19	232.392	238.086	243.653	249.775	261.888
		Power receiving	GWh	Residue transportation	3.47204	3.36595	3.25387	3.17392	3.19207	3.22104	3.25	3.28949	3.3087	3.33179	3.35527	3.38954	3.40384	3.42922	3.73156	4.06784	4.3342	4.63548	4.93718	5.26733	5.52912	5.82621	6.12461	6.45851	6.72573	7.02949	7.33611	7.64652	7.99258	8.27774	8.60098	8.92983	9.29539	9.60328
		Power receiving	GWh	Incineration facility	2677.76	2594.14	2518.55	2428.59	2348.23	2262.68	2179.68	2094.98	2001.3	1909.35	1817.43	1726.75	1638.82	1544.73	1465.12	1383.3	1301.53	1232.68	596.903	572.121	551.102	534.09	513.386	499.727	472.86	447.004	416.235	389.411	378.849	360.119	341.906	320.398	318.97	302.468
		Power receiving	GWh	Bulk waste treatment facility	187.291	186.902	186.494	185.249	184.527	183.75	182.922	182.051	181.139	180.192	179.211	178.199	177.157	176.085	174.984	173.855	172.698	171.514	170.307	169.075	167.822	166.549	165.259	163.955	162.638	161.312	159.979	158.644	157.307	155.971	154.638	153.308	151.982	150.658
		Power receiving	GWh	Composting facility	89.3148	85.7422	85.7422	85.1865	84.3863	83.7941	83.1791	82.7729	81.8896	81.2193	80.5337	80.0582	79.1198	78.3923	77.9022	77.6114	76.8842	76.3574	75.8197	75.4776	74.7135	74.147	73.5727	73.1918	72.4056	71.8152	71.2221	70.6274	70.2241	69.4376	68.8441	68.252	67.8469	67.0722
		Power receiving	GWh	Feed production facility	28.1022	28.1022	28.1022	28.1022	28.1022	28.1022	28.1022	28.1022	28.1022	28.1022	28.1022	28.1022	28.1022	28.1022	28.1022	28.1022	28.1022	28.1022	28.1022	28.1022	28.1022	28.1022	28.1022	28.1022	28.1022	28.1022	28.1022	28.1022	28.1022	28.1022	28.1022	28.1022	28.1022	28.1022
		Power receiving	GWh	Other resource recovery facilities	250.694	240.47	229.61	222.224	224.337	227.415	230.498	234.626	236.8	239.369	241.991	245.678	247.44	250.292	280.137	313.294	339.658	369.424	399.237	431.819	457.763	487.142	516.648	549.605	576.085	606.112	636.412	667.079	701.198	729.4	761.291	793.717	829.697	859.906
		Power receiving	GWh	Material recycling after incineration	30.2566	30.1886	30.5941	30.246	29.9158	29.6585	29.393	29.2016	28.8419	28.563	28.2787	28.0687	27.6949	27.3958	26.923	26.4977	25.9687	25.4875	25.0039	24.5735	24.0436	23.5606	23.0761	22.6373	22.1046	21.6183	21.1319	20.6451	20.2047	19.6737	19.1886	18.7036	18.2641	17.7376
		Power receiving	GWh	Refuse fuel production facility	127.868	132.418	129.441	123.204	121.016	119.161	117.266	115.736	113.406	111.479	109.526	107.936	105.548	103.525	112.586	122.309	128.744	136.039	144.359	152.781	160.465	166.171	172.241	179.219	184.115	188.717	195.729	200.402	204.372	208.09	211.407	214.225	215.979	214.953
		Power receiving	GWh	Other facilities	19.8381	19.8381	19.8381	19.8381	19.8381	19.8381	19.8381	19.8381	19.8381	19.8381	19.8381	19.8381	19.8381	19.8381	19.8381	19.8381	19.8381	19.8381	19.8381	19.8381	19.8381	19.8381	19.8381	19.8381	19.8381	19.8381	19.8381	19.8381	19.8381	19.8381	19.8381	19.8381	19.8381	19.8381
		Power receiving	GWh	Landfill site	156.192	156.068	155.087	152.562	150.18	148.152	146.085	144.378	141.853	140.604	139.328	138.415	136.704	135.357	133.782	132.503	130.579	128.951	127.307	126.044	124.158	122.565	120.961	119.642	117.729	116.106	114.479	112.85	111.507	109.597	107.973	106.351	105.007	103.119
		Power receiving	GWh	Human waste treatment plant and sludge treatment center	954.352	934.583	928.806	926.761	903.79	894.583	888.472	883.136	877.255	871.571	865.627	862.581	860.626	861.243	842.375	825.596	808.912	787.964	768.738	751.788	733.932	716.345	697.915	681.598	662.158	645.591	625.825	608.802	591.61	573.18	558.093	542.007	526.298	513.784
		Power receiving	GWh	Community plant	244.626	244.119	243.586	241.96	241.016	240.001	238.92	237.782	236.591	235.354	234.073	232.751	231.39	229.99	228.552	227.077	225.566	224.02	222.442	220.834	219.197	217.535	215.85	214.146	212.426	210.694	208.954	207.209	205.463	203.719	201.977	200.24	198.508	196.779
		Fuel	GWh	Collection	1720.97	1663.85	1613.77	1547.91	1484.95	1426.35	1368.01	1313.62	1252.41	1195.54	1139.15	1086.3	1027.96	973.226	921.086	871.765	818.145	767.398	717.171	669.314	618.369	569.846	521.938	475.966	428.048	382.102	336.841	292.275	249.091	205.251	162.797	121.048	80.2196	0
		Fuel	GWh	Residue transportation	208.996	199.928	192.444	183.513	176.778	170.695	164.623	158.976	152.476	146.296	140.135	134.355	127.879	121.79	119.48	117.15	113.286	109.696	105.814	101.994	96.9289	92.0253	86.8635	81.7017	75.5653	69.4793	63.0884	56.362	49.508	41.9898	34.3034	26.2772	17.948	0
		Fuel	GWh	Incineration facility	3471.62	3477.65	3539.52	3457.48	3464.11	3460.69	3480.41	3520.73	3526.12	3535.03	3535.53	3541.61	3541.67	3532.02	3478.08	3417.02	3346.35	3270.95	2830.7	2769.15	2700.29	2628.28	2547.09	2539.25	2456.8	2382.39	2294.17	2189.95	2114.77	2027.65	1929.73	1838.44	1773.26	1702.41
		Fuel	GWh	Bulk waste treatment facility	46.0939	45.9982	45.8978	45.5914	45.4137	45.2223	45.0187	44.8042	44.5798	44.3466	44.1053	43.8563	43.5998	43.3361	43.0651	42.7871	42.5023	42.2111	41.9139	41.6108	41.3024	40.9892	40.6717	40.3506	40.0265	39.7002	39.3723	39.0435	38.7145	38.3858	38.0577	37.7304	37.4039	37.0782
		Fuel	GWh	Composting facility	38.874	37.319	37.319	37.0772	36.7289	36.4711	36.2034	36.0266	35.6422	35.3504	35.052	34.8451	34.4366	34.12	33.9067	33.7801	33.4636	33.2343	33.0003	32.8514	32.5188	32.2722	32.0223	31.8565	31.5143	31.2573	30.9992	30.7403	30.5648	30.2225	29.9642	29.7065	29.5301	29.193
		Fuel	GWh	Feed production facility	11.9034	11.9034	11.9034	11.9034	11.9034	11.9034	11.9034	11.9034	11.9034	11.9034	11.9034	11.9034	11.9034	11.9034	11.9034	11.9034	11.9034	11.9034	11.9034	11.9034	11.9034	11.9034	11.9034	11.9034	11.9034	11.9034	11.9034	11.9034	11.9034	11.9034	11.9034	11.9034	11.9034	11.9034
		Fuel	GWh	Other resource recovery facilities	103.417	99.1994	94.7195	91.6723	92.5441	93.8139	95.0856	96.7887	97.6853	98.7451	99.8269	101.348	102.075	103.251	115.563	129.241	140.116	152.396	164.694	178.135	188.838	200.957	213.129	226.724	237.648	250.035	262.534	275.185	289.26	300.894	314.05	327.426	342.269	354.731
		Fuel	GWh	Material recycling after incineration	335.896	335.141	339.643	335.779	332.113	329.256	326.31	324.185	320.191	317.095	313.938	311.608	307.458	304.137	298.888	294.166	288.294	282.952	277.583	272.805	266.922	261.561	256.182	251.31	245.396	239.998	234.598	229.193	224.304	218.41	213.024	207.64	202.76	196.916
		Fuel	GWh	Refuse fuel production facility	410.745	414.876	414.068	391.185	383.492	376.828	370.039	364.401	356.251	350.067	343.8	338.677	331.034	324.539	323.979	324.311	321.224	320.23	319.175	314.562	307.579	301.706	295.789	290.958	283.851	277.843	271.82	265.789	260.832	253.724	247.698	241.682	236.714	229.672
		Fuel	GWh	Other facilities	2.21509	2.21509	2.21509	2.21509	2.21509	2.21509	2.21509	2.21509	2.21509	2.21509	2.21509	2.21509	2.21509	2.21509	2.21509	2.21509	2.21509	2.21509	2.21509	2.21509	2.21509	2.21509	2.21509	2.21509	2.21509	2.21509	2.21509	2.21509	2.21509	2.21509	2.21509	2.21509	2.21509	2.21509
		Fuel	GWh	Landfill site	91.9851	91.9121	91.3342	89.8475	88.4444	87.2503	86.0329	85.0276	83.5403	82.8046	82.0536	81.5155	80.5082	79.7146	78.7875	78.0341	76.9006	75.9419	74.9739	74.2301	73.1197	72.1813	71.2366	70.4599	69.3333	68.3772	67.4193	66.46	65.6687	64.5441	63.5877	62.6322	61.8409	60.7289
		Fuel	GWh	Human waste treatment plant and sludge treatment center	595.83	583.226	573.153	566.629	551.068	540.471	530.111	519.878	510.668	500.549	492.249	482.463	474.416	466.951	450.327	433.229	416.571	398.126	381.504	367.418	351.885	337.155	320.066	306.071	292.035	276.883	261.601	246.625	234.646	217.908	207.56	196.802	184.62	174.866
		Fuel	GWh	Community plant	0.0329593	0.032605	0.0326033	0.0327966	0.0320175	0.0319008	0.031884	0.0318577	0.0318232	0.0317817	0.0317339	0.0316802	0.0316204	0.0315541	0.0313568	0.0311544	0.030947	0.030735	0.0305185	0.0302979	0.0300733	0.0298452	0.0296141	0.0293803	0.0291443	0.0289067	0.0286679	0.0284286	0.028189	0.0279497	0.0277108	0.0274724	0.0272347	0.0269976
					2017	2018	2019	2020	2021	2022	2023	2024	2025	2026	2027	2028	2029	2030	2031	2032	2033	2034	2035	2036	2037	2038	2039	2040	2041	2042	2043	2044	2045	2046	2047	2048	2049	2050
		Power receiving+Fuel	GWh	Collection	1730.52	1682.88	1642.32	1585.6	1531.65	1482.04	1432.55	1387.07	1334.22	1285.78	1237.68	1193.25	1142.59	1095.66	1051.45	1010.3	963.956	920.728	877.88	837.719	793.404	751.825	710.715	671.931	629.986	590.405	551.369	512.891	476.282	437.643	400.883	364.701	329.995	261.888
		Power receiving+Fuel	GWh	Residue transportation	212.468	203.294	195.698	186.687	179.97	173.916	167.873	162.265	155.784	149.628	143.49	137.744	131.283	125.219	123.212	121.218	117.62	114.331	110.752	107.261	102.458	97.8515	92.9881	88.1602	82.2911	76.5088	70.4245	64.0085	57.5005	50.2675	42.9044	35.207	27.2434	9.60328
		Power receiving+Fuel	GWh	Incineration facility	6149.38	6071.79	6058.07	5886.07	5812.33	5723.36	5660.09	5615.71	5527.42	5444.38	5352.96	5268.36	5180.49	5076.75	4943.2	4800.32	4647.89	4503.63	3427.61	3341.27	3251.39	3162.37	3060.48	3038.98	2929.66	2829.4	2710.41	2579.36	2493.62	2387.77	2271.63	2158.84	2092.23	2004.88
		Power receiving+Fuel	GWh	Bulk waste treatment facility	233.385	232.9	232.392	230.841	229.941	228.972	227.941	226.855	225.719	224.538	223.316	222.055	220.757	219.421	218.049	216.642	215.2	213.725	212.22	210.686	209.124	207.538	205.931	204.305	202.664	201.012	199.352	197.687	196.021	194.357	192.696	191.039	189.386	187.736
		Power receiving+Fuel	GWh	Composting facility	128.189	123.061	123.061	122.264	121.115	120.265	119.382	118.799	117.532	116.57	115.586	114.903	113.556	112.512	111.809	111.391	110.348	109.592	108.82	108.329	107.232	106.419	105.595	105.048	103.92	103.073	102.221	101.368	100.789	99.6602	98.8083	97.9585	97.377	96.2652
		Power receiving+Fuel	GWh	Feed production facility	40.0055	40.0055	40.0055	40.0055	40.0055	40.0055	40.0055	40.0055	40.0055	40.0055	40.0055	40.0055	40.0055	40.0055	40.0055	40.0055	40.0055	40.0055	40.0055	40.0055	40.0055	40.0055	40.0055	40.0055	40.0055	40.0055	40.0055	40.0055	40.0055	40.0055	40.0055	40.0055	40.0055	40.0055
		Power receiving+Fuel	GWh	Other resource recovery facilities	354.112	339.67	324.33	313.896	316.881	321.229	325.584	331.415	334.485	338.114	341.818	347.026	349.514	353.543	395.7	442.535	479.774	521.82	563.932	609.955	646.601	688.098	729.777	776.329	813.733	856.146	898.946	942.264	990.459	1030.29	1075.34	1121.14	1171.97	1214.64
		Power receiving+Fuel	GWh	Material recycling after incineration	366.153	365.33	370.237	366.025	362.028	358.915	355.703	353.386	349.033	345.658	342.217	339.676	335.153	331.533	325.811	320.664	314.263	308.44	302.587	297.378	290.966	285.121	279.258	273.947	267.501	261.616	255.729	249.838	244.509	238.083	232.212	226.343	221.024	214.653
		Power receiving+Fuel	GWh	Refuse fuel production facility	538.612	547.293	543.509	514.389	504.508	495.989	487.305	480.137	469.658	461.546	453.326	446.614	436.582	428.064	436.565	446.62	449.968	456.269	463.534	467.344	468.044	467.876	468.03	470.177	467.965	466.561	467.55	466.19	465.205	461.814	459.106	455.906	452.694	444.625
		Power receiving+Fuel	GWh	Other facilities	22.0532	22.0532	22.0532	22.0532	22.0532	22.0532	22.0532	22.0532	22.0532	22.0532	22.0532	22.0532	22.0532	22.0532	22.0532	22.0532	22.0532	22.0532	22.0532	22.0532	22.0532	22.0532	22.0532	22.0532	22.0532	22.0532	22.0532	22.0532	22.0532	22.0532	22.0532	22.0532	22.0532	22.0532
		Power receiving+Fuel	GWh	Landfill site	248.177	247.98	246.421	242.41	238.625	235.403	232.118	229.406	225.393	223.408	221.382	219.93	217.212	215.071	212.57	210.537	207.479	204.893	202.281	200.274	197.278	194.746	192.197	190.102	187.062	184.483	181.898	179.31	177.175	174.141	171.561	168.983	166.848	163.848
		Power receiving+Fuel	GWh	Human waste treatment plant and sludge treatment center	1550.18	1517.81	1501.96	1493.39	1454.86	1435.05	1418.58	1403.01	1387.92	1372.12	1357.88	1345.04	1335.04	1328.19	1292.7	1258.83	1225.48	1186.09	1150.24	1119.21	1085.82	1053.5	1017.98	987.669	954.193	922.475	887.426	855.427	826.256	791.087	765.653	738.809	710.918	688.65
		Power receiving+Fuel	GWh	Community plant	244.659	244.151	243.618	241.993	241.048	240.033	238.952	237.814	236.623	235.385	234.104	232.783	231.422	230.022	228.584	227.108	225.597	224.051	222.473	220.864	219.227	217.565	215.88	214.176	212.455	210.723	208.983	207.238	205.491	203.747	202.005	200.268	198.535	196.806
				Energy supply (electricity and heat)	-5947.54	-6004.78	-6442.22	-6557.02	-6643.31	-6767.61	-6891.05	-7041.72	-7133.06	-7261.24	-7375.96	-7508.54	-7556.71	-7626.6	-7894.79	-8196.64	-8454.24	-8668.55	-10002.4	-9983.08	-9897.55	-9778.98	-9637.41	-9537.17	-9213.44	-8892.19	-8583.11	-8228.67	-8035.97	-7704.45	-7365.41	-6988.12	-6779.35	-6239.46
				Energy balance	5870.36	5633.43	5101.46	4688.6	4411.71	4109.63	3837.08	3566.21	3292.79	2997.96	2709.85	2420.91	2198.94	1951.44	1506.91	1031.57	565.395	157.079	-2298.06	-2400.73	-2463.94	-2484.01	-2496.53	-2454.28	-2299.95	-2127.74	-1986.75	-1811.03	-1740.61	-1573.52	-1390.55	-1166.87	-1059.08	-693.814
		Electric power transmission	GWh	Incineration facility	5100.19	5173.92	5603.67	5728.93	5831.51	5964.96	6099.16	6254.33	6356.71	6491.97	6618.56	6751.54	6817.88	6903.95	6923.19	6965.4	6975.67	6941.56	7965.06	7809.37	7591.27	7347.66	7100.38	6877.62	6649.91	6431.03	6223.22	5972.72	5672.97	5368.3	5060.03	4728.35	4389.36	4014.65
		Electric power transmission	GWh	Methane fermentation facility	0	4.41598	0.729043	1.92862	2.20845	2.50433	2.80036	3.10492	3.38546	3.38295	3.38047	3.38717	3.37562	3.37324	24.6627	47.6736	69.0328	87.2208	107.91	132.485	156.062	174.085	193.011	213.297	230.3	246.092	265.767	281.433	294.621	308.808	321.229	332.448	340.344	343.133
		External heat supply	GWh	External heat supply	847.348	826.448	837.821	826.162	809.592	800.138	789.091	784.29	772.962	765.885	754.026	753.617	735.457	719.277	946.934	1183.57	1409.54	1639.76	1929.47	2041.22	2150.21	2257.24	2344.02	2446.25	2333.23	2215.08	2094.12	1974.51	2068.38	2027.34	1984.15	1927.32	2049.64	1881.68

## Sheet: Advanced innovation
					Fiscal Year
					2017	2018	2019	2020	2021	2022	2023	2024	2025	2026	2027	2028	2029	2030	2031	2032	2033	2034	2035	2036	2037	2038	2039	2040	2041	2042	2043	2044	2045	2046	2047	2048	2049	2050
		Waste	kt	Collection	37007	36862.9	36870.7	36506.8	36189.3	35959.9	35720.7	35571	35218	34963.5	34702.4	34531.3	34162.1	33883.2	33550.7	33421.7	33016	32697	32373.3	32134.3	31712.6	31376.4	31036.9	30781.1	30349.7	30003.2	29655.5	29307.1	29041.7	28610.2	28262.4	27915.1	27648.8	27222.5
		Waste	kt	Incineration facility	34247	34170	34629	34230.3	33851.6	33555.6	33250.4	33029	32617.1	32296.6	31970	31727.6	31299.7	30956.3	30334.3	29629.5	28717.6	27875.9	27047.4	26267.6	25354.5	24508.7	23698.8	22918.7	22024.6	21215	20407.3	19564.6	18812.8	17965.8	17155.6	16358.7	15618.6	14798.5
		Waste	kt	Bulk waste treatment facility	1749.87	1746.23	1742.42	1730.79	1724.04	1716.78	1709.05	1700.9	1692.39	1683.53	1674.37	1664.92	1655.18	1645.17	1634.88	1624.33	1613.52	1602.46	1591.18	1579.67	1567.97	1556.08	1544.02	1531.83	1519.53	1507.14	1494.69	1482.21	1469.72	1457.24	1444.79	1432.36	1419.97	1407.6
		Waste	kt	Composting facility	225	216	216	214.6	212.584	211.093	209.543	208.52	206.295	204.606	202.879	201.681	199.317	197.484	196.25	195.517	193.685	192.358	191.003	190.142	188.217	186.79	185.343	184.383	182.403	180.916	179.421	177.923	176.907	174.926	173.431	171.939	170.919	168.967
		Waste	kt	Feed production facility	12	12	12	12	12	12	12	12	12	12	12	12	12	12	12	12	12	12	12	12	12	12	12	12	12	12	12	12	12	12	12	12	12	12
		Waste	kt	Other resource recovery facilities	2819.1	2704.12	2582.01	2504.14	2533.1	2572.92	2612.78	2664.42	2694.08	2728.2	2762.94	2809.68	2834.8	2872.23	3508.67	3967.02	4309.91	4692.87	5076.98	5493.54	5833.05	6212.07	6591.88	7011.02	7351.2	7730.37	8109.12	8487.87	8900.68	9210.62	9542.22	9862.95	10209.7	10469.7
		Waste	kt	Material recycling after incineration	1225.35	1222.6	1239.02	1224.76	1211.21	1200.62	1189.7	1181.78	1167.04	1155.57	1143.88	1135.21	1119.9	1107.61	1085.36	1064.91	1037.65	1012.33	986.907	963.66	936.38	911.007	885.574	861.989	834.657	809.212	783.769	758.303	734.774	707.538	682.175	656.802	633.333	606.314
		Waste	kt	Refuse fuel production facility	796.174	819.334	667.87	628.701	614.413	602.352	590.094	580.233	565.246	546.503	527.631	511.132	489.526	470.3	586.867	737.237	852.582	953.659	1066.88	1200.22	1315.61	1395.28	1496.74	1609.41	1686.35	1763.42	1874.81	1949.43	2017.49	2097.32	2165.51	2230.12	2277.31	2283.36
		Waste	kt	Other facilities	61	61	61	61	61	61	61	61	61	61	61	61	61	61	61	61	61	61	61	61	61	61	61	61	61	61	61	61	61	61	61	61	61	61
		Waste	kt	Landfill site	4075.42	4072.18	4046.58	3980.47	3918.07	3864.93	3810.75	3765.97	3699.84	3667	3633.49	3609.41	3564.54	3529.15	3476.67	3438.58	3374.88	3318.96	3262.65	3216.27	3153.61	3098.6	3043.31	2995.48	2932.2	2876.48	2820.7	2764.85	2716.53	2653.38	2597.7	2542.05	2493.76	2431.21
		Human waste	kl	Human waste treatment plant and sludge treatment center	19163	18957	18956	19068.4	18615.4	18547.6	18537.8	18522.5	18502.5	18478.3	18450.5	18419.3	18384.5	18346	18231.3	18113.6	17993	17869.7	17743.9	17615.6	17485	17352.4	17218	17082.1	16944.9	16806.7	16667.9	16528.8	16389.5	16250.3	16111.4	15972.9	15834.7	15696.8
		Human waste	kl	Community plant	19531.9	19491.3	19448.8	19319	19243.6	19162.6	19076.3	18985.4	18890.3	18791.5	18689.2	18583.7	18475	18363.3	18248.5	18130.7	18010	17886.6	17760.6	17632.2	17501.5	17368.8	17234.3	17098.2	16960.9	16822.6	16683.7	16544.4	16405	16265.7	16126.6	15987.9	15849.6	15711.6
					Fiscal Year
					2017	2018	2019	2020	2021	2022	2023	2024	2025	2026	2027	2028	2029	2030	2031	2032	2033	2034	2035	2036	2037	2038	2039	2040	2041	2042	2043	2044	2045	2046	2047	2048	2049	2050
		Power receiving	MWh	Collection	9551.67	19029	28549.5	37690.2	46703.1	55688.4	64537.7	73448.2	81809.2	90242.1	98525.2	106952	114626	122435	129894	138021	144867	151906	158758	165880	171888	178164	184247	190673	195835	201343	206664	211800	217377	221533	226134	230560	235497	245919
		Power receiving	MWh	Residue transportation	3472.04	3365.95	3253.87	3178.67	3201.56	3235.27	3268.99	3313.23	3337.2	3365.08	3393.35	3432.45	3451.61	3481.89	4059.11	4473.55	4782.36	5127.74	5474.12	5850.16	6155.64	6497.26	6839.59	7217.92	7523.95	7865.73	8207.15	8548.61	8921.36	9199.94	9498.43	9787.05	10099.6	10334.5
		Power receiving	MWh	Incineration facility	2.67776e+06	2.59414e+06	2.51855e+06	2.42855e+06	2.34839e+06	2.26304e+06	2.18024e+06	2.09573e+06	2.00224e+06	1.91046e+06	1.81872e+06	1.7282e+06	1.64042e+06	1.54646e+06	1.46658e+06	1.38467e+06	1.30591e+06	1.23998e+06	606923	584662	566051	551425	519414	507577	482678	459464	430920	411518	388411	369408	349934	327588	308821	296596
		Power receiving	MWh	Bulk waste treatment facility	187291	186902	186494	185249	184527	183750	182922	182051	181139	180192	179211	178199	177157	176085	174984	173855	172698	171514	170307	169075	167822	166549	165259	163955	162638	161312	159979	158644	157307	155971	154638	153308	151982	150658
		Power receiving	MWh	Composting facility	89314.8	85742.2	85742.2	85186.5	84386.3	83794.1	83179.1	82772.9	81889.6	81219.3	80533.7	80058.2	79119.8	78392.3	77902.2	77611.4	76884.2	76357.4	75819.7	75477.6	74713.5	74147	73572.7	73191.8	72405.6	71815.2	71222.1	70627.4	70224.1	69437.6	68844.1	68252	67846.9	67072.2
		Power receiving	MWh	Feed production facility	28102.2	28102.2	28102.2	28102.2	28102.2	28102.2	28102.2	28102.2	28102.2	28102.2	28102.2	28102.2	28102.2	28102.2	28102.2	28102.2	28102.2	28102.2	28102.2	28102.2	28102.2	28102.2	28102.2	28102.2	28102.2	28102.2	28102.2	28102.2	28102.2	28102.2	28102.2	28102.2	28102.2	28102.2
		Power receiving	MWh	Other resource recovery facilities	250694	240470	229610	222686	225262	228802	232347	236939	239576	242611	245700	249857	252091	255420	312016	352776	383268	417324	451481	488525	518716	552422	586198	623471	653721	687440	721121	754802	791513	819074	848562	877084	907923	931040
		Power receiving	MWh	Material recycling after incineration	30256.6	30188.6	30594.1	30241.8	29907.3	29645.8	29376.2	29180.5	28816.6	28533.5	28244.9	28030.8	27652.7	27349.4	26799.8	26294.8	25621.7	24996.5	24368.8	23794.8	23121.2	22494.7	21866.7	21284.3	20609.5	19981.2	19352.9	18724.1	18143.1	17470.6	16844.4	16217.8	15638.3	14971.2
		Power receiving	MWh	Refuse fuel production facility	127868	132418	129441	123027	120662	118629	116557	114849	112342	110238	108107	106340	103775	101574	110554	120339	123179	127688	133180	139948	145094	148289	152010	156815	159478	161973	167177	169972	172172	174283	176069	177465	177801	175040
		Power receiving	MWh	Other facilities	19838.1	19838.1	19838.1	19838.1	19838.1	19838.1	19838.1	19838.1	19838.1	19838.1	19838.1	19838.1	19838.1	19838.1	19838.1	19838.1	19838.1	19838.1	19838.1	19838.1	19838.1	19838.1	19838.1	19838.1	19838.1	19838.1	19838.1	19838.1	19838.1	19838.1	19838.1	19838.1	19838.1	19838.1
		Power receiving	MWh	Landfill site	156192	156068	155087	152553	150162	148125	146049	144333	141798	140540	139255	138332	136613	135256	133245	131785	129344	127201	125043	123265	120864	118755	116636	114803	112378	110243	108105	105964	104112	101692	99558.1	97425.2	95574.6	93177.3
		Power receiving	MWh	Human waste treatment plant and sludge treatment center	954352	934583	928806	926761	903790	894583	888472	883136	877255	871571	865627	862581	860626	861243	842375	825596	808912	787964	768738	751788	733932	716345	697915	681598	662158	645591	625825	608802	591610	573180	558093	542007	526298	513784
		Power receiving	MWh	Community plant	244626	244119	243586	241960	241016	240001	238920	237782	236591	235354	234073	232751	231390	229990	228552	227077	225566	224020	222442	220834	219197	217535	215850	214146	212426	210694	208954	207209	205463	203719	201977	200240	198508	196779
					2017	2018	2019	2020	2021	2022	2023	2024	2025	2026	2027	2028	2029	2030	2031	2032	2033	2034	2035	2036	2037	2038	2039	2040	2041	2042	2043	2044	2045	2046	2047	2048	2049	2050
		Fuel	GJ	Collection	6.19549e+06	5.98986e+06	5.80957e+06	5.57247e+06	5.34582e+06	5.13487e+06	4.92483e+06	4.72903e+06	4.50869e+06	4.30395e+06	4.10094e+06	3.91069e+06	3.70067e+06	3.50361e+06	3.30404e+06	3.12677e+06	2.92624e+06	2.73697e+06	2.55047e+06	2.37341e+06	2.18611e+06	2.00844e+06	1.83388e+06	1.6672e+06	1.4944e+06	1.32961e+06	1.16818e+06	1.01015e+06	857996	704375	556649	412357	272282	0
		Fuel	GJ	Residue transportation	752387	719742	692798	660990	637063	615462	593881	573805	550638	528605	506614	485976	462812	441021	446581	440800	426999	414169	400173	386305	367717	349605	330410	311089	287974	264920	240599	214908	188633	159485	129677	98757.4	66999.5	0
		Fuel	GJ	Incineration facility	1.24978e+07	1.25195e+07	1.27423e+07	1.24457e+07	1.24685e+07	1.2455e+07	1.25248e+07	1.26688e+07	1.26865e+07	1.27169e+07	1.2717e+07	1.27372e+07	1.27357e+07	1.26992e+07	1.24887e+07	1.22523e+07	1.19679e+07	1.16662e+07	1.00507e+07	9.79168e+06	9.50602e+06	9.2032e+06	8.89204e+06	8.81951e+06	8.50756e+06	8.23231e+06	7.89472e+06	7.51334e+06	7.21023e+06	6.89563e+06	6.54326e+06	6.21083e+06	5.90144e+06	5.62971e+06
		Fuel	GJ	Bulk waste treatment facility	165938	165593	165232	164129	163489	162800	162067	161295	160487	159648	158779	157883	156959	156010	155034	154034	153008	151960	150890	149799	148689	147561	146418	145262	144095	142921	141740	140557	139372	138189	137008	135829	134654	133481
		Fuel	GJ	Composting facility	139946	134348	134348	133478	132224	131296	130332	129696	128312	127262	126187	125442	123972	122832	122064	121608	120469	119643	118801	118265	117068	116180	115280	114683	113451	112526	111597	110665	110033	108801	107871	106943	106308	105095
		Fuel	GJ	Feed production facility	42852.1	42852.1	42852.1	42852.1	42852.1	42852.1	42852.1	42852.1	42852.1	42852.1	42852.1	42852.1	42852.1	42852.1	42852.1	42852.1	42852.1	42852.1	42852.1	42852.1	42852.1	42852.1	42852.1	42852.1	42852.1	42852.1	42852.1	42852.1	42852.1	42852.1	42852.1	42852.1	42852.1	42852.1
		Fuel	GJ	Other resource recovery facilities	372302	357118	340990	330707	334532	339790	345055	351874	355791	360297	364885	371058	374376	379319	463369	523900	569185	619760	670486	725500	770336	820391	870551	925905	970829	1.0209e+06	1.07092e+06	1.12094e+06	1.17546e+06	1.21639e+06	1.26018e+06	1.30254e+06	1.34834e+06	1.38267e+06
		Fuel	GJ	Material recycling after incineration	1.20923e+06	1.20651e+06	1.22272e+06	1.20864e+06	1.19527e+06	1.18482e+06	1.17404e+06	1.16622e+06	1.15168e+06	1.14036e+06	1.12883e+06	1.12027e+06	1.10516e+06	1.09304e+06	1.07107e+06	1.05089e+06	1.02399e+06	999005	973918	950977	924057	899018	873920	850645	823673	798562	773454	748323	725104	698226	673197	648158	624998	598334
		Fuel	GJ	Refuse fuel production facility	1.47868e+06	1.49355e+06	1.49064e+06	1.40586e+06	1.37577e+06	1.34938e+06	1.32253e+06	1.29983e+06	1.26809e+06	1.24343e+06	1.21846e+06	1.19762e+06	1.1677e+06	1.14191e+06	1.14999e+06	1.16006e+06	1.12051e+06	1.0887e+06	1.05665e+06	1.01198e+06	958377	908955	859370	813881	759806	709879	659894	609876	563913	509833	459839	409877	363873	310044
		Fuel	GJ	Other facilities	7974.31	7974.31	7974.31	7974.31	7974.31	7974.31	7974.31	7974.31	7974.31	7974.31	7974.31	7974.31	7974.31	7974.31	7974.31	7974.31	7974.31	7974.31	7974.31	7974.31	7974.31	7974.31	7974.31	7974.31	7974.31	7974.31	7974.31	7974.31	7974.31	7974.31	7974.31	7974.31	7974.31	7974.31
		Fuel	GJ	Landfill site	331146	330884	328803	323431	318361	314043	309641	306002	300629	297961	295238	293281	289635	286759	282495	279400	274224	269681	265105	261336	256246	251776	247283	243396	238254	233728	229195	224657	220731	215599	211075	206553	202630	197547
		Fuel	GJ	Human waste treatment plant and sludge treatment center	2.14499e+06	2.09961e+06	2.06335e+06	2.03987e+06	1.98384e+06	1.94569e+06	1.9084e+06	1.87156e+06	1.83841e+06	1.80198e+06	1.7721e+06	1.73687e+06	1.7079e+06	1.68102e+06	1.62118e+06	1.55963e+06	1.49966e+06	1.43325e+06	1.37342e+06	1.3227e+06	1.26679e+06	1.21376e+06	1.15224e+06	1.10185e+06	1.05133e+06	996780	941764	887850	844725	784467	747217	708487	664632	629517
		Fuel	GJ	Community plant	118.654	117.378	117.372	118.068	115.263	114.843	114.783	114.688	114.564	114.414	114.242	114.049	113.833	113.595	112.884	112.156	111.409	110.646	109.867	109.072	108.264	107.443	106.611	105.769	104.92	104.064	103.205	102.343	101.48	100.619	99.7588	98.9008	98.0451	97.1912
		Electric power transmission	MWh	Incineration facility	5.10019e+06	5.17392e+06	5.60367e+06	5.72726e+06	5.82419e+06	5.95177e+06	6.07982e+06	6.22857e+06	6.32425e+06	6.45248e+06	6.57174e+06	6.69711e+06	6.7556e+06	6.83343e+06	6.82047e+06	6.82486e+06	6.681e+06	6.49005e+06	7.30925e+06	6.98144e+06	6.59036e+06	6.17556e+06	5.80865e+06	5.4135e+06	5.06424e+06	4.7325e+06	4.38783e+06	4.00518e+06	3.56715e+06	3.18702e+06	2.82836e+06	2.47486e+06	2.06606e+06	1.71009e+06
		Electric power transmission	MWh	Methane fermentation facility	0	4415.98	729.043	1969.75	2290.73	2627.75	2964.91	3310.61	3632.28	3670.91	3709.57	3757.4	3786.99	3825.75	23181.4	44503.5	63144.7	80512.3	100278	126699	150098	167963	187119	208021	225576	242179	263383	280415	295183	311419	326032	339704	350023	354555
		External heat supply	GJ	External heat supply	3.05045e+06	2.97521e+06	3.01616e+06	2.97366e+06	2.91227e+06	2.8765e+06	2.835e+06	2.81596e+06	2.77342e+06	2.74615e+06	2.70171e+06	2.69835e+06	2.63125e+06	2.57128e+06	3.37953e+06	4.21821e+06	4.96955e+06	5.71813e+06	6.65335e+06	6.94953e+06	7.21878e+06	7.46414e+06	6.84615e+06	7.04731e+06	6.54089e+06	6.04911e+06	5.564e+06	5.35349e+06	4.82665e+06	4.58592e+06	4.34219e+06	4.10044e+06	3.75341e+06	3.46704e+06
					2017	2018	2019	2020	2021	2022	2023	2024	2025	2026	2027	2028	2029	2030	2031	2032	2033	2034	2035	2036	2037	2038	2039	2040	2041	2042	2043	2044	2045	2046	2047	2048	2049	2050
		Power receiving	GWh	Collection	9.55167	19.029	28.5495	37.6902	46.7031	55.6884	64.5377	73.4482	81.8092	90.2421	98.5252	106.952	114.626	122.435	129.894	138.021	144.867	151.906	158.758	165.88	171.888	178.164	184.247	190.673	195.835	201.343	206.664	211.8	217.377	221.533	226.134	230.56	235.497	245.919
		Power receiving	GWh	Residue transportation	3.47204	3.36595	3.25387	3.17867	3.20156	3.23527	3.26899	3.31323	3.3372	3.36508	3.39335	3.43245	3.45161	3.48189	4.05911	4.47355	4.78236	5.12774	5.47412	5.85016	6.15564	6.49726	6.83959	7.21792	7.52395	7.86573	8.20715	8.54861	8.92136	9.19994	9.49843	9.78705	10.0996	10.3345
		Power receiving	GWh	Incineration facility	2677.76	2594.14	2518.55	2428.55	2348.39	2263.04	2180.24	2095.73	2002.24	1910.46	1818.72	1728.2	1640.42	1546.46	1466.58	1384.67	1305.91	1239.98	606.923	584.662	566.051	551.425	519.414	507.577	482.678	459.464	430.92	411.518	388.411	369.408	349.934	327.588	308.821	296.596
		Power receiving	GWh	Bulk waste treatment facility	187.291	186.902	186.494	185.249	184.527	183.75	182.922	182.051	181.139	180.192	179.211	178.199	177.157	176.085	174.984	173.855	172.698	171.514	170.307	169.075	167.822	166.549	165.259	163.955	162.638	161.312	159.979	158.644	157.307	155.971	154.638	153.308	151.982	150.658
		Power receiving	GWh	Composting facility	89.3148	85.7422	85.7422	85.1865	84.3863	83.7941	83.1791	82.7729	81.8896	81.2193	80.5337	80.0582	79.1198	78.3923	77.9022	77.6114	76.8842	76.3574	75.8197	75.4776	74.7135	74.147	73.5727	73.1918	72.4056	71.8152	71.2221	70.6274	70.2241	69.4376	68.8441	68.252	67.8469	67.0722
		Power receiving	GWh	Feed production facility	28.1022	28.1022	28.1022	28.1022	28.1022	28.1022	28.1022	28.1022	28.1022	28.1022	28.1022	28.1022	28.1022	28.1022	28.1022	28.1022	28.1022	28.1022	28.1022	28.1022	28.1022	28.1022	28.1022	28.1022	28.1022	28.1022	28.1022	28.1022	28.1022	28.1022	28.1022	28.1022	28.1022	28.1022
		Power receiving	GWh	Other resource recovery facilities	250.694	240.47	229.61	222.686	225.262	228.802	232.347	236.939	239.576	242.611	245.7	249.857	252.091	255.42	312.016	352.776	383.268	417.324	451.481	488.525	518.716	552.422	586.198	623.471	653.721	687.44	721.121	754.802	791.513	819.074	848.562	877.084	907.923	931.04
		Power receiving	GWh	Material recycling after incineration	30.2566	30.1886	30.5941	30.2418	29.9073	29.6458	29.3762	29.1805	28.8166	28.5335	28.2449	28.0308	27.6527	27.3494	26.7998	26.2948	25.6217	24.9965	24.3688	23.7948	23.1212	22.4947	21.8667	21.2843	20.6095	19.9812	19.3529	18.7241	18.1431	17.4706	16.8444	16.2178	15.6383	14.9712
		Power receiving	GWh	Refuse fuel production facility	127.868	132.418	129.441	123.027	120.662	118.629	116.557	114.849	112.342	110.238	108.107	106.34	103.775	101.574	110.554	120.339	123.179	127.688	133.18	139.948	145.094	148.289	152.01	156.815	159.478	161.973	167.177	169.972	172.172	174.283	176.069	177.465	177.801	175.04
		Power receiving	GWh	Other facilities	19.8381	19.8381	19.8381	19.8381	19.8381	19.8381	19.8381	19.8381	19.8381	19.8381	19.8381	19.8381	19.8381	19.8381	19.8381	19.8381	19.8381	19.8381	19.8381	19.8381	19.8381	19.8381	19.8381	19.8381	19.8381	19.8381	19.8381	19.8381	19.8381	19.8381	19.8381	19.8381	19.8381	19.8381
		Power receiving	GWh	Landfill site	156.192	156.068	155.087	152.553	150.162	148.125	146.049	144.333	141.798	140.54	139.255	138.332	136.613	135.256	133.245	131.785	129.344	127.201	125.043	123.265	120.864	118.755	116.636	114.803	112.378	110.243	108.105	105.964	104.112	101.692	99.5581	97.4252	95.5746	93.1773
		Power receiving	GWh	Human waste treatment plant and sludge treatment center	954.352	934.583	928.806	926.761	903.79	894.583	888.472	883.136	877.255	871.571	865.627	862.581	860.626	861.243	842.375	825.596	808.912	787.964	768.738	751.788	733.932	716.345	697.915	681.598	662.158	645.591	625.825	608.802	591.61	573.18	558.093	542.007	526.298	513.784
		Power receiving	GWh	Community plant	244.626	244.119	243.586	241.96	241.016	240.001	238.92	237.782	236.591	235.354	234.073	232.751	231.39	229.99	228.552	227.077	225.566	224.02	222.442	220.834	219.197	217.535	215.85	214.146	212.426	210.694	208.954	207.209	205.463	203.719	201.977	200.24	198.508	196.779
		Fuel	GWh	Collection	1720.97	1663.85	1613.77	1547.91	1484.95	1426.35	1368.01	1313.62	1252.41	1195.54	1139.15	1086.3	1027.96	973.226	917.788	868.546	812.844	760.269	708.463	659.281	607.253	557.9	509.412	463.112	415.112	369.335	324.493	280.596	238.332	195.66	154.625	114.544	75.6339	0
		Fuel	GWh	Residue transportation	208.996	199.928	192.444	183.608	176.962	170.962	164.967	159.39	152.955	146.835	140.726	134.993	128.559	122.506	124.05	122.444	118.611	115.047	111.159	107.307	102.144	97.1126	91.7806	86.4137	79.9928	73.589	66.8331	59.6966	52.398	44.3015	36.0213	27.4326	18.611	0
		Fuel	GWh	Incineration facility	3471.62	3477.65	3539.52	3457.15	3463.46	3459.71	3479.11	3519.11	3524.02	3532.47	3532.51	3538.11	3537.7	3527.55	3469.1	3403.42	3324.41	3240.6	2791.87	2719.91	2640.56	2556.44	2470.01	2449.86	2363.21	2286.75	2192.98	2087.04	2002.84	1915.45	1817.57	1725.23	1639.29	1563.81
		Fuel	GWh	Bulk waste treatment facility	46.0939	45.9982	45.8978	45.5914	45.4137	45.2223	45.0187	44.8042	44.5798	44.3466	44.1053	43.8563	43.5998	43.3361	43.0651	42.7871	42.5023	42.2111	41.9139	41.6108	41.3024	40.9892	40.6717	40.3506	40.0265	39.7002	39.3723	39.0435	38.7145	38.3858	38.0577	37.7304	37.4039	37.0782
		Fuel	GWh	Composting facility	38.874	37.319	37.319	37.0772	36.7289	36.4711	36.2034	36.0266	35.6422	35.3504	35.052	34.8451	34.4366	34.12	33.9067	33.7801	33.4636	33.2343	33.0003	32.8514	32.5188	32.2722	32.0223	31.8565	31.5143	31.2573	30.9992	30.7403	30.5648	30.2225	29.9642	29.7065	29.5301	29.193
		Fuel	GWh	Feed production facility	11.9034	11.9034	11.9034	11.9034	11.9034	11.9034	11.9034	11.9034	11.9034	11.9034	11.9034	11.9034	11.9034	11.9034	11.9034	11.9034	11.9034	11.9034	11.9034	11.9034	11.9034	11.9034	11.9034	11.9034	11.9034	11.9034	11.9034	11.9034	11.9034	11.9034	11.9034	11.9034	11.9034	11.9034
		Fuel	GWh	Other resource recovery facilities	103.417	99.1994	94.7195	91.863	92.9255	94.3861	95.8486	97.7427	98.8307	100.083	101.357	103.072	103.993	105.366	128.714	145.528	158.107	172.156	186.246	201.528	213.982	227.887	241.82	257.196	269.675	283.584	297.479	311.373	326.517	337.887	350.051	361.817	374.539	384.075
		Fuel	GWh	Material recycling after incineration	335.896	335.141	339.643	335.732	332.019	329.116	326.122	323.951	319.91	316.767	313.564	311.186	306.989	303.622	297.52	291.915	284.442	277.501	270.533	264.16	256.682	249.727	242.755	236.29	228.798	221.823	214.848	207.868	201.418	193.952	186.999	180.044	173.61	166.204
		Fuel	GWh	Refuse fuel production facility	410.745	414.876	414.068	390.518	382.157	374.827	367.37	361.065	352.248	345.396	338.461	332.671	324.361	317.198	319.442	322.239	311.254	302.416	293.514	281.107	266.216	252.487	238.714	226.078	211.057	197.189	183.304	169.41	156.643	141.62	127.733	113.855	101.076	86.1233
		Fuel	GWh	Other facilities	2.21509	2.21509	2.21509	2.21509	2.21509	2.21509	2.21509	2.21509	2.21509	2.21509	2.21509	2.21509	2.21509	2.21509	2.21509	2.21509	2.21509	2.21509	2.21509	2.21509	2.21509	2.21509	2.21509	2.21509	2.21509	2.21509	2.21509	2.21509	2.21509	2.21509	2.21509	2.21509	2.21509	2.21509
		Fuel	GWh	Landfill site	91.9851	91.9121	91.3342	89.8421	88.4337	87.2341	86.0114	85.0006	83.508	82.7669	82.0105	81.467	80.4543	79.6553	78.4709	77.6111	76.1735	74.9114	73.6403	72.5934	71.1793	69.9377	68.6898	67.6101	66.1818	64.9243	63.6653	62.4048	61.3141	59.8887	58.632	57.3759	56.286	54.8742
		Fuel	GWh	Human waste treatment plant and sludge treatment center	595.83	583.226	573.153	566.629	551.068	540.471	530.111	519.878	510.668	500.549	492.249	482.463	474.416	466.951	450.327	433.229	416.571	398.126	381.504	367.418	351.885	337.155	320.066	306.071	292.035	276.883	261.601	246.625	234.646	217.908	207.56	196.802	184.62	174.866
		Fuel	GWh	Community plant	0.0329593	0.032605	0.0326033	0.0327966	0.0320175	0.0319008	0.031884	0.0318577	0.0318232	0.0317817	0.0317339	0.0316802	0.0316204	0.0315541	0.0313568	0.0311544	0.030947	0.030735	0.0305185	0.0302979	0.0300733	0.0298452	0.0296141	0.0293803	0.0291443	0.0289067	0.0286679	0.0284286	0.028189	0.0279497	0.0277108	0.0274724	0.0272347	0.0269976
					2017	2018	2019	2020	2021	2022	2023	2024	2025	2026	2027	2028	2029	2030	2031	2032	2033	2034	2035	2036	2037	2038	2039	2040	2041	2042	2043	2044	2045	2046	2047	2048	2049	2050
		Power receiving+Fuel	GWh	Collection	1730.52	1682.88	1642.32	1585.6	1531.65	1482.04	1432.55	1387.07	1334.22	1285.78	1237.68	1193.25	1142.59	1095.66	1047.68	1006.57	957.71	912.175	867.221	825.161	779.142	736.064	693.659	653.786	610.947	570.678	531.157	492.397	455.71	417.192	380.758	345.104	311.131	245.919
		Power receiving+Fuel	GWh	Residue transportation	212.468	203.294	195.698	186.787	180.164	174.197	168.236	162.703	156.292	150.2	144.119	138.426	132.01	125.988	128.109	126.918	123.393	120.175	116.633	113.157	108.299	103.61	98.6202	93.6316	87.5168	81.4547	75.0403	68.2452	61.3193	53.5014	45.5198	37.2197	28.7106	10.3345
		Power receiving+Fuel	GWh	Incineration facility	6149.38	6071.79	6058.07	5885.7	5811.85	5722.75	5659.35	5614.84	5526.26	5442.93	5351.22	5266.31	5178.12	5074.01	4935.68	4788.09	4630.32	4480.58	3398.79	3304.57	3206.61	3107.87	2989.43	2957.44	2845.89	2746.22	2623.9	2498.56	2391.25	2284.86	2167.51	2052.82	1948.11	1860.4
		Power receiving+Fuel	GWh	Bulk waste treatment facility	233.385	232.9	232.392	230.841	229.941	228.972	227.941	226.855	225.719	224.538	223.316	222.055	220.757	219.421	218.049	216.642	215.2	213.725	212.22	210.686	209.124	207.538	205.931	204.305	202.664	201.012	199.352	197.687	196.021	194.357	192.696	191.039	189.386	187.736
		Power receiving+Fuel	GWh	Composting facility	128.189	123.061	123.061	122.264	121.115	120.265	119.382	118.799	117.532	116.57	115.586	114.903	113.556	112.512	111.809	111.391	110.348	109.592	108.82	108.329	107.232	106.419	105.595	105.048	103.92	103.073	102.221	101.368	100.789	99.6602	98.8083	97.9585	97.377	96.2652
		Power receiving+Fuel	GWh	Feed production facility	40.0055	40.0055	40.0055	40.0055	40.0055	40.0055	40.0055	40.0055	40.0055	40.0055	40.0055	40.0055	40.0055	40.0055	40.0055	40.0055	40.0055	40.0055	40.0055	40.0055	40.0055	40.0055	40.0055	40.0055	40.0055	40.0055	40.0055	40.0055	40.0055	40.0055	40.0055	40.0055	40.0055	40.0055
		Power receiving+Fuel	GWh	Other resource recovery facilities	354.112	339.67	324.33	314.549	318.187	323.188	328.196	334.682	338.407	342.693	347.057	352.928	356.084	360.786	440.73	498.303	541.375	589.479	637.727	690.053	732.698	780.308	828.017	880.666	923.396	971.024	1018.6	1066.18	1118.03	1156.96	1198.61	1238.9	1282.46	1315.12
		Power receiving+Fuel	GWh	Material recycling after incineration	366.153	365.33	370.237	365.974	361.926	358.761	355.498	353.131	348.727	345.3	341.809	339.217	334.642	330.971	324.32	318.21	310.063	302.498	294.902	287.955	279.804	272.222	264.622	257.575	249.407	241.804	234.201	226.592	219.561	211.422	203.844	196.262	189.249	181.175
		Power receiving+Fuel	GWh	Refuse fuel production facility	538.612	547.293	543.509	513.545	502.819	493.455	483.927	475.914	464.59	455.634	446.569	439.012	428.136	418.772	429.996	442.577	434.432	430.104	426.694	421.054	411.31	400.777	390.724	382.893	370.535	359.162	350.481	339.382	328.814	315.903	303.802	291.319	278.877	261.164
		Power receiving+Fuel	GWh	Other facilities	22.0532	22.0532	22.0532	22.0532	22.0532	22.0532	22.0532	22.0532	22.0532	22.0532	22.0532	22.0532	22.0532	22.0532	22.0532	22.0532	22.0532	22.0532	22.0532	22.0532	22.0532	22.0532	22.0532	22.0532	22.0532	22.0532	22.0532	22.0532	22.0532	22.0532	22.0532	22.0532	22.0532	22.0532
		Power receiving+Fuel	GWh	Landfill site	248.177	247.98	246.421	242.395	238.595	235.359	232.06	229.333	225.306	223.307	221.266	219.799	217.067	214.911	211.716	209.396	205.517	202.112	198.683	195.858	192.043	188.693	185.326	182.413	178.56	175.167	171.77	168.369	165.427	161.581	158.19	154.801	151.861	148.051
		Power receiving+Fuel	GWh	Human waste treatment plant and sludge treatment center	1550.18	1517.81	1501.96	1493.39	1454.86	1435.05	1418.58	1403.01	1387.92	1372.12	1357.88	1345.04	1335.04	1328.19	1292.7	1258.83	1225.48	1186.09	1150.24	1119.21	1085.82	1053.5	1017.98	987.669	954.193	922.475	887.426	855.427	826.256	791.087	765.653	738.809	710.918	688.65
		Power receiving+Fuel	GWh	Community plant	244.659	244.151	243.618	241.993	241.048	240.033	238.952	237.814	236.623	235.385	234.104	232.783	231.422	230.022	228.584	227.108	225.597	224.051	222.473	220.864	219.227	217.565	215.88	214.176	212.455	210.723	208.983	207.238	205.491	203.747	202.005	200.268	198.535	196.806
				Energy supply (electricity and heat)	-5947.54	-6004.78	-6442.22	-6555.24	-6635.44	-6753.42	-6870.29	-7014.09	-7098.27	-7218.97	-7325.92	-7450.41	-7490.29	-7551.5	-7782.41	-8041.09	-8124.57	-8158.93	-9257.68	-9038.56	-8745.68	-8416.9	-7897.48	-7579.1	-7106.72	-6654.99	-6196.77	-5772.67	-5203.07	-4772.31	-4360.56	-3953.58	-3458.7	-3027.72
				Energy balance	5870.36	5633.43	5101.46	4689.85	4418.77	4122.71	3856.44	3592.12	3325.39	3037.55	2756.74	2475.38	2261.19	2021.81	1649.02	1225	916.926	673.71	-1561.21	-1479.6	-1352.31	-1180.27	-839.638	-597.442	-305.183	-10.1376	268.419	510.825	927.659	1180.02	1418.89	1652.98	1989.98	2225.96
		Electric power transmission	GWh	Incineration facility	5100.19	5173.92	5603.67	5727.26	5824.19	5951.77	6079.82	6228.57	6324.25	6452.48	6571.74	6697.11	6755.6	6833.43	6820.47	6824.86	6681	6490.05	7309.25	6981.44	6590.36	6175.56	5808.65	5413.5	5064.24	4732.5	4387.83	4005.18	3567.15	3187.02	2828.36	2474.86	2066.06	1710.09
		Electric power transmission	GWh	Methane fermentation facility	0	4.41598	0.729043	1.96975	2.29073	2.62775	2.96491	3.31061	3.63228	3.67091	3.70957	3.7574	3.78699	3.82575	23.1814	44.5035	63.1447	80.5123	100.278	126.699	150.098	167.963	187.119	208.021	225.576	242.179	263.383	280.415	295.183	311.419	326.032	339.704	350.023	354.555
		External heat supply	GWh	External heat supply	847.348	826.448	837.821	826.017	808.965	799.028	787.5	782.211	770.394	762.82	750.474	749.542	730.903	714.245	938.759	1171.73	1380.43	1588.37	1848.15	1930.42	2005.22	2073.37	1901.71	1957.59	1816.91	1680.31	1545.56	1487.08	1340.74	1273.87	1206.16	1139.01	1042.61	963.068

## Sheet: Net zero emissions
					Fiscal Year
					2017	2018	2019	2020	2021	2022	2023	2024	2025	2026	2027	2028	2029	2030	2031	2032	2033	2034	2035	2036	2037	2038	2039	2040	2041	2042	2043	2044	2045	2046	2047	2048	2049	2050
		Waste	kt	Collection	37007	36862.9	36870.7	36506.8	36189.3	35959.9	35720.7	35571	35218	34963.5	34702.4	34531.3	34162.1	33883.2	33550.7	33421.7	33016	32697	32373.3	32134.3	31712.6	31376.4	31036.9	30781.1	30349.7	30003.2	29655.5	29307.1	29041.7	28610.2	28262.4	27915.1	27648.8	27222.5
		Waste	kt	Incineration facility	34247	34170	34629	34230.3	33851.6	33555.6	33250.4	33029	32617.1	32296.6	31970	31727.6	31299.7	30956.3	30334.3	29629.5	28717.6	27875.9	27047.4	26267.6	25354.5	24508.7	23698.8	22918.7	22024.6	21215	20407.3	19564.6	18812.8	17965.8	17155.6	16358.7	15618.6	14798.5
		Waste	kt	Bulk waste treatment facility	1749.87	1746.23	1742.42	1730.79	1724.04	1716.78	1709.05	1700.9	1692.39	1683.53	1674.37	1664.92	1655.18	1645.17	1634.88	1624.33	1613.52	1602.46	1591.18	1579.67	1567.97	1556.08	1544.02	1531.83	1519.53	1507.14	1494.69	1482.21	1469.72	1457.24	1444.79	1432.36	1419.97	1407.6
		Waste	kt	Composting facility	225	216	216	214.6	212.584	211.093	209.543	208.52	206.295	204.606	202.879	201.681	199.317	197.484	196.25	195.517	193.685	192.358	191.003	190.142	188.217	186.79	185.343	184.383	182.403	180.916	179.421	177.923	176.907	174.926	173.431	171.939	170.919	168.967
		Waste	kt	Feed production facility	12	12	12	12	12	12	12	12	12	12	12	12	12	12	12	12	12	12	12	12	12	12	12	12	12	12	12	12	12	12	12	12	12	12
		Waste	kt	Other resource recovery facilities	2819.1	2704.12	2582.01	2504.14	2533.1	2572.92	2612.78	2664.42	2694.08	2728.2	2762.94	2809.68	2834.8	2872.23	3508.67	3967.02	4309.91	4692.87	5076.98	5493.54	5833.05	6212.07	6591.88	7011.02	7351.2	7730.37	8109.12	8487.87	8900.68	9210.62	9542.22	9862.95	10209.7	10469.7
		Waste	kt	Material recycling after incineration	1225.35	1222.6	1239.02	1224.76	1211.21	1200.62	1189.7	1181.78	1167.04	1155.57	1143.88	1135.21	1119.9	1107.61	1085.36	1064.91	1037.65	1012.33	986.907	963.66	936.38	911.007	885.574	861.989	834.657	809.212	783.769	758.303	734.774	707.538	682.175	656.802	633.333	606.314
		Waste	kt	Refuse fuel production facility	796.174	819.334	667.87	628.701	614.413	602.352	590.094	580.233	565.246	546.503	527.631	511.132	489.526	470.3	586.867	737.237	852.582	953.659	1066.88	1200.22	1315.61	1395.28	1496.74	1609.41	1686.35	1763.42	1874.81	1949.43	2017.49	2097.32	2165.51	2230.12	2277.31	2283.36
		Waste	kt	Other facilities	61	61	61	61	61	61	61	61	61	61	61	61	61	61	61	61	61	61	61	61	61	61	61	61	61	61	61	61	61	61	61	61	61	61
		Waste	kt	Landfill site	4075.42	4072.18	4046.58	3980.47	3918.07	3864.93	3810.75	3765.97	3699.84	3667	3633.49	3609.41	3564.54	3529.15	3476.67	3438.58	3374.88	3318.96	3262.65	3216.27	3153.61	3098.6	3043.31	2995.48	2932.2	2876.48	2820.71	2764.85	2716.53	2653.38	2597.7	2542.05	2493.76	2431.21
		Human waste	kl	Human waste treatment plant and sludge treatment center	19163	18957	18956	19068.4	18615.4	18547.6	18537.8	18522.5	18502.5	18478.3	18450.5	18419.3	18384.5	18346	18231.3	18113.6	17993	17869.7	17743.9	17615.6	17485	17352.4	17218	17082.1	16944.9	16806.7	16667.9	16528.8	16389.5	16250.3	16111.4	15972.9	15834.7	15696.8
		Human waste	kl	Community plant	19531.9	19491.3	19448.8	19319	19243.6	19162.6	19076.3	18985.4	18890.3	18791.5	18689.2	18583.7	18475	18363.3	18248.5	18130.7	18010	17886.6	17760.6	17632.2	17501.5	17368.8	17234.3	17098.2	16960.9	16822.6	16683.7	16544.4	16405	16265.7	16126.6	15987.9	15849.6	15711.6
					Fiscal Year
					2017	2018	2019	2020	2021	2022	2023	2024	2025	2026	2027	2028	2029	2030	2031	2032	2033	2034	2035	2036	2037	2038	2039	2040	2041	2042	2043	2044	2045	2046	2047	2048	2049	2050
		Power receiving	MWh	Collection	9551.67	19029	28549.5	37690.2	46703.1	55688.4	64537.7	73448.2	81809.2	90242.1	98525.2	106952	114626	122435	129894	138021	144867	151906	158758	165880	171888	178164	184247	190673	195835	201343	206664	211800	217377	221533	226134	230560	235497	245919
		Power receiving	MWh	Residue transportation	3472.04	3365.95	3253.87	3178.67	3201.56	3235.27	3268.99	3313.23	3337.2	3365.08	3393.35	3432.45	3451.61	3481.89	4059.11	4473.55	4782.36	5127.74	5474.12	5850.16	6155.64	6497.26	6839.59	7217.92	7523.95	7865.73	8207.15	8548.61	8921.36	9199.94	9498.43	9787.05	10099.6	10334.5
		Power receiving	MWh	Incineration facility	2.67776e+06	2.59414e+06	2.51855e+06	2.42855e+06	2.34839e+06	2.26304e+06	2.18024e+06	2.09573e+06	2.00224e+06	1.91046e+06	1.81872e+06	1.7282e+06	1.64042e+06	1.54646e+06	1.46658e+06	1.38467e+06	1.30591e+06	1.23998e+06	606923	584662	566051	538021	505869	493708	500300	509710	518367	530155	588311	621743	655999	666996	677885	729235
		Power receiving	MWh	Bulk waste treatment facility	187291	186902	186494	185249	184527	183750	182922	182051	181139	180192	179211	178199	177157	176085	174984	173855	172698	171514	170307	169075	167822	166549	165259	163955	162638	161312	159979	158644	157307	155971	154638	153308	151982	150658
		Power receiving	MWh	Composting facility	89314.8	85742.2	85742.2	85186.5	84386.3	83794.1	83179.1	82772.9	81889.6	81219.3	80533.7	80058.2	79119.8	78392.3	77902.2	77611.4	76884.2	76357.4	75819.7	75477.6	74713.5	74147	73572.7	73191.8	72405.6	71815.2	71222.1	70627.4	70224.1	69437.6	68844.1	68252	67846.9	67072.2
		Power receiving	MWh	Feed production facility	28102.2	28102.2	28102.2	28102.2	28102.2	28102.2	28102.2	28102.2	28102.2	28102.2	28102.2	28102.2	28102.2	28102.2	28102.2	28102.2	28102.2	28102.2	28102.2	28102.2	28102.2	28102.2	28102.2	28102.2	28102.2	28102.2	28102.2	28102.2	28102.2	28102.2	28102.2	28102.2	28102.2	28102.2
		Power receiving	MWh	Other resource recovery facilities	250694	240470	229610	222686	225262	228802	232347	236939	239576	242611	245700	249857	252091	255420	312016	352776	383268	417324	451481	488525	518716	552422	586198	623471	653721	687440	721121	754802	791513	819074	848562	877084	907923	931040
		Power receiving	MWh	Material recycling after incineration	30256.6	30188.6	30594.1	30241.8	29907.3	29645.8	29376.2	29180.5	28816.6	28533.5	28244.9	28030.8	27652.7	27349.4	26799.8	26294.8	25621.7	24996.5	24368.8	23794.8	23121.2	22494.7	21866.7	21284.3	20609.5	19981.2	19352.9	18724.1	18143.1	17470.6	16844.4	16217.8	15638.3	14971.2
		Power receiving	MWh	Refuse fuel production facility	127868	132418	129441	123027	120662	118629	116557	114849	112342	110238	108107	106340	103775	101574	110554	120339	123179	127688	133180	139948	145094	148289	152010	156815	159478	161973	167177	169972	172172	174283	176069	177465	177801	175040
		Power receiving	MWh	Other facilities	19838.1	19838.1	19838.1	19838.1	19838.1	19838.1	19838.1	19838.1	19838.1	19838.1	19838.1	19838.1	19838.1	19838.1	19838.1	19838.1	19838.1	19838.1	19838.1	19838.1	19838.1	19838.1	19838.1	19838.1	19838.1	19838.1	19838.1	19838.1	19838.1	19838.1	19838.1	19838.1	19838.1	19838.1
		Power receiving	MWh	Landfill site	156192	156068	155087	152553	150162	148125	146049	144333	141798	140540	139255	138332	136613	135256	133245	131785	129344	127201	125043	123265	120864	118755	116636	114803	112378	110243	108105	105964	104112	101692	99558.1	97425.2	95574.6	93177.3
		Power receiving	MWh	Human waste treatment plant and sludge treatment center	954352	934583	928806	926761	903790	894583	888472	883136	877255	871571	865627	862581	860626	861243	842375	825596	808912	787964	768738	751788	733932	716345	697915	681598	662158	645591	625825	608802	591610	573180	558093	542007	526298	513784
		Power receiving	MWh	Community plant	244626	244119	243586	241960	241016	240001	238920	237782	236591	235354	234073	232751	231390	229990	228552	227077	225566	224020	222442	220834	219197	217535	215850	214146	212426	210694	208954	207209	205463	203719	201977	200240	198508	196779
					2017	2018	2019	2020	2021	2022	2023	2024	2025	2026	2027	2028	2029	2030	2031	2032	2033	2034	2035	2036	2037	2038	2039	2040	2041	2042	2043	2044	2045	2046	2047	2048	2049	2050
		Fuel	GJ	Collection	6.19549e+06	5.98986e+06	5.80957e+06	5.57247e+06	5.34582e+06	5.13487e+06	4.92483e+06	4.72903e+06	4.50869e+06	4.30395e+06	4.10094e+06	3.91069e+06	3.70067e+06	3.50361e+06	3.30404e+06	3.12677e+06	2.92624e+06	2.73697e+06	2.55047e+06	2.37341e+06	2.18611e+06	2.00844e+06	1.83388e+06	1.6672e+06	1.4944e+06	1.32961e+06	1.16818e+06	1.01015e+06	857996	704375	556649	412357	272282	0
		Fuel	GJ	Residue transportation	752387	719742	692798	660990	637063	615462	593881	573805	550638	528605	506614	485976	462812	441021	446581	440800	426999	414169	400173	386305	367717	349605	330410	311089	287974	264920	240599	214908	188633	159485	129677	98757.4	66999.5	0
		Fuel	GJ	Incineration facility	1.24978e+07	1.25195e+07	1.27423e+07	1.24457e+07	1.24685e+07	1.2455e+07	1.25248e+07	1.26688e+07	1.26865e+07	1.27169e+07	1.2717e+07	1.27372e+07	1.27357e+07	1.26992e+07	1.24887e+07	1.22523e+07	1.19679e+07	1.16662e+07	1.00507e+07	9.79168e+06	9.50602e+06	9.22853e+06	8.91768e+06	8.8458e+06	8.53371e+06	8.25774e+06	7.92058e+06	7.53918e+06	7.23613e+06	6.92203e+06	6.56936e+06	6.23742e+06	5.92786e+06	5.65591e+06
		Fuel	GJ	Bulk waste treatment facility	165938	165593	165232	164129	163489	162800	162067	161295	160487	159648	158779	157883	156959	156010	155034	154034	153008	151960	150890	149799	148689	147561	146418	145262	144095	142921	141740	140557	139372	138189	137008	135829	134654	133481
		Fuel	GJ	Composting facility	139946	134348	134348	133478	132224	131296	130332	129696	128312	127262	126187	125442	123972	122832	122064	121608	120469	119643	118801	118265	117068	116180	115280	114683	113451	112526	111597	110665	110033	108801	107871	106943	106308	105095
		Fuel	GJ	Feed production facility	42852.1	42852.1	42852.1	42852.1	42852.1	42852.1	42852.1	42852.1	42852.1	42852.1	42852.1	42852.1	42852.1	42852.1	42852.1	42852.1	42852.1	42852.1	42852.1	42852.1	42852.1	42852.1	42852.1	42852.1	42852.1	42852.1	42852.1	42852.1	42852.1	42852.1	42852.1	42852.1	42852.1	42852.1
		Fuel	GJ	Other resource recovery facilities	372302	357118	340990	330707	334532	339790	345055	351874	355791	360297	364885	371058	374376	379319	463369	523900	569185	619760	670486	725500	770336	820391	870551	925905	970829	1.0209e+06	1.07092e+06	1.12094e+06	1.17546e+06	1.21639e+06	1.26018e+06	1.30254e+06	1.34834e+06	1.38267e+06
		Fuel	GJ	Material recycling after incineration	1.20923e+06	1.20651e+06	1.22272e+06	1.20864e+06	1.19527e+06	1.18482e+06	1.17404e+06	1.16622e+06	1.15168e+06	1.14036e+06	1.12883e+06	1.12027e+06	1.10516e+06	1.09304e+06	1.07107e+06	1.05089e+06	1.02399e+06	999005	973918	950977	924057	899018	873920	850645	823673	798562	773454	748323	725104	698226	673197	648158	624998	598334
		Fuel	GJ	Refuse fuel production facility	1.47868e+06	1.49355e+06	1.49064e+06	1.40586e+06	1.37577e+06	1.34938e+06	1.32253e+06	1.29983e+06	1.26809e+06	1.24343e+06	1.21846e+06	1.19762e+06	1.1677e+06	1.14191e+06	1.14999e+06	1.16006e+06	1.12051e+06	1.0887e+06	1.05665e+06	1.01198e+06	958377	908955	859370	813881	759806	709879	659894	609876	563913	509833	459839	409877	363873	310044
		Fuel	GJ	Other facilities	7974.31	7974.31	7974.31	7974.31	7974.31	7974.31	7974.31	7974.31	7974.31	7974.31	7974.31	7974.31	7974.31	7974.31	7974.31	7974.31	7974.31	7974.31	7974.31	7974.31	7974.31	7974.31	7974.31	7974.31	7974.31	7974.31	7974.31	7974.31	7974.31	7974.31	7974.31	7974.31	7974.31	7974.31
		Fuel	GJ	Landfill site	331146	330884	328803	323431	318361	314043	309641	306002	300629	297961	295238	293281	289635	286759	282495	279400	274224	269681	265105	261336	256246	251776	247283	243396	238254	233728	229195	224657	220731	215599	211075	206553	202630	197547
		Fuel	GJ	Human waste treatment plant and sludge treatment center	2.14499e+06	2.09961e+06	2.06335e+06	2.03987e+06	1.98384e+06	1.94569e+06	1.9084e+06	1.87156e+06	1.83841e+06	1.80198e+06	1.7721e+06	1.73687e+06	1.7079e+06	1.68102e+06	1.62118e+06	1.55963e+06	1.49966e+06	1.43325e+06	1.37342e+06	1.3227e+06	1.26679e+06	1.21376e+06	1.15224e+06	1.10185e+06	1.05133e+06	996780	941764	887850	844725	784467	747217	708487	664632	629517
		Fuel	GJ	Community plant	118.654	117.378	117.372	118.068	115.263	114.843	114.783	114.688	114.564	114.414	114.242	114.049	113.833	113.595	112.884	112.156	111.409	110.646	109.867	109.072	108.264	107.443	106.611	105.769	104.92	104.064	103.205	102.343	101.48	100.619	99.7588	98.9008	98.0451	97.1912
		Electric power transmission	MWh	Incineration facility	5.10019e+06	5.17392e+06	5.60367e+06	5.72726e+06	5.82419e+06	5.95177e+06	6.07982e+06	6.22857e+06	6.32425e+06	6.45248e+06	6.57174e+06	6.69711e+06	6.7556e+06	6.83343e+06	6.82047e+06	6.82486e+06	6.681e+06	6.49005e+06	7.30925e+06	6.98144e+06	6.59036e+06	6.22917e+06	5.86132e+06	5.46577e+06	4.97942e+06	4.50828e+06	4.036e+06	3.57944e+06	2.70951e+06	2.37283e+06	2.07985e+06	1.7769e+06	1.44359e+06	1.17184e+06
		Electric power transmission	MWh	Methane fermentation facility	0	4415.98	729.043	1969.75	2290.73	2627.75	2964.91	3310.61	3632.28	3670.91	3709.57	3757.4	3786.99	3825.75	23181.4	44503.5	63144.7	80512.3	100278	126699	150098	167963	187119	208021	225576	242179	263383	280415	295183	311419	326032	339704	350023	354555
		External heat supply	GJ	External heat supply	3.05045e+06	2.97521e+06	3.01616e+06	2.97366e+06	2.91227e+06	2.8765e+06	2.835e+06	2.81596e+06	2.77342e+06	2.74615e+06	2.70171e+06	2.69835e+06	2.63125e+06	2.57128e+06	3.37953e+06	4.21821e+06	4.96955e+06	5.71813e+06	6.65335e+06	6.94953e+06	7.21878e+06	6.66906e+06	6.06002e+06	6.26143e+06	5.62687e+06	5.03687e+06	4.7396e+06	4.42596e+06	3.81432e+06	3.50183e+06	3.21032e+06	2.98686e+06	2.72207e+06	2.426e+06
					2017	2018	2019	2020	2021	2022	2023	2024	2025	2026	2027	2028	2029	2030	2031	2032	2033	2034	2035	2036	2037	2038	2039	2040	2041	2042	2043	2044	2045	2046	2047	2048	2049	2050
		Power receiving	GWh	Collection	9.55167	19.029	28.5495	37.6902	46.7031	55.6884	64.5377	73.4482	81.8092	90.2421	98.5252	106.952	114.626	122.435	129.894	138.021	144.867	151.906	158.758	165.88	171.888	178.164	184.247	190.673	195.835	201.343	206.664	211.8	217.377	221.533	226.134	230.56	235.497	245.919
		Power receiving	GWh	Residue transportation	3.47204	3.36595	3.25387	3.17867	3.20156	3.23527	3.26899	3.31323	3.3372	3.36508	3.39335	3.43245	3.45161	3.48189	4.05911	4.47355	4.78236	5.12774	5.47412	5.85016	6.15564	6.49726	6.83959	7.21792	7.52395	7.86573	8.20715	8.54861	8.92136	9.19994	9.49843	9.78705	10.0996	10.3345
		Power receiving	GWh	Incineration facility	2677.76	2594.14	2518.55	2428.55	2348.39	2263.04	2180.24	2095.73	2002.24	1910.46	1818.72	1728.2	1640.42	1546.46	1466.58	1384.67	1305.91	1239.98	606.923	584.662	566.051	538.021	505.869	493.708	500.3	509.71	518.367	530.155	588.311	621.743	655.999	666.996	677.885	729.235
		Power receiving	GWh	Bulk waste treatment facility	187.291	186.902	186.494	185.249	184.527	183.75	182.922	182.051	181.139	180.192	179.211	178.199	177.157	176.085	174.984	173.855	172.698	171.514	170.307	169.075	167.822	166.549	165.259	163.955	162.638	161.312	159.979	158.644	157.307	155.971	154.638	153.308	151.982	150.658
		Power receiving	GWh	Composting facility	89.3148	85.7422	85.7422	85.1865	84.3863	83.7941	83.1791	82.7729	81.8896	81.2193	80.5337	80.0582	79.1198	78.3923	77.9022	77.6114	76.8842	76.3574	75.8197	75.4776	74.7135	74.147	73.5727	73.1918	72.4056	71.8152	71.2221	70.6274	70.2241	69.4376	68.8441	68.252	67.8469	67.0722
		Power receiving	GWh	Feed production facility	28.1022	28.1022	28.1022	28.1022	28.1022	28.1022	28.1022	28.1022	28.1022	28.1022	28.1022	28.1022	28.1022	28.1022	28.1022	28.1022	28.1022	28.1022	28.1022	28.1022	28.1022	28.1022	28.1022	28.1022	28.1022	28.1022	28.1022	28.1022	28.1022	28.1022	28.1022	28.1022	28.1022	28.1022
		Power receiving	GWh	Other resource recovery facilities	250.694	240.47	229.61	222.686	225.262	228.802	232.347	236.939	239.576	242.611	245.7	249.857	252.091	255.42	312.016	352.776	383.268	417.324	451.481	488.525	518.716	552.422	586.198	623.471	653.721	687.44	721.121	754.802	791.513	819.074	848.562	877.084	907.923	931.04
		Power receiving	GWh	Material recycling after incineration	30.2566	30.1886	30.5941	30.2418	29.9073	29.6458	29.3762	29.1805	28.8166	28.5335	28.2449	28.0308	27.6527	27.3494	26.7998	26.2948	25.6217	24.9965	24.3688	23.7948	23.1212	22.4947	21.8667	21.2843	20.6095	19.9812	19.3529	18.7241	18.1431	17.4706	16.8444	16.2178	15.6383	14.9712
		Power receiving	GWh	Refuse fuel production facility	127.868	132.418	129.441	123.027	120.662	118.629	116.557	114.849	112.342	110.238	108.107	106.34	103.775	101.574	110.554	120.339	123.179	127.688	133.18	139.948	145.094	148.289	152.01	156.815	159.478	161.973	167.177	169.972	172.172	174.283	176.069	177.465	177.801	175.04
		Power receiving	GWh	Other facilities	19.8381	19.8381	19.8381	19.8381	19.8381	19.8381	19.8381	19.8381	19.8381	19.8381	19.8381	19.8381	19.8381	19.8381	19.8381	19.8381	19.8381	19.8381	19.8381	19.8381	19.8381	19.8381	19.8381	19.8381	19.8381	19.8381	19.8381	19.8381	19.8381	19.8381	19.8381	19.8381	19.8381	19.8381
		Power receiving	GWh	Landfill site	156.192	156.068	155.087	152.553	150.162	148.125	146.049	144.333	141.798	140.54	139.255	138.332	136.613	135.256	133.245	131.785	129.344	127.201	125.043	123.265	120.864	118.755	116.636	114.803	112.378	110.243	108.105	105.964	104.112	101.692	99.5581	97.4252	95.5746	93.1773
		Power receiving	GWh	Human waste treatment plant and sludge treatment center	954.352	934.583	928.806	926.761	903.79	894.583	888.472	883.136	877.255	871.571	865.627	862.581	860.626	861.243	842.375	825.596	808.912	787.964	768.738	751.788	733.932	716.345	697.915	681.598	662.158	645.591	625.825	608.802	591.61	573.18	558.093	542.007	526.298	513.784
		Power receiving	GWh	Community plant	244.626	244.119	243.586	241.96	241.016	240.001	238.92	237.782	236.591	235.354	234.073	232.751	231.39	229.99	228.552	227.077	225.566	224.02	222.442	220.834	219.197	217.535	215.85	214.146	212.426	210.694	208.954	207.209	205.463	203.719	201.977	200.24	198.508	196.779
		Fuel	GWh	Collection	1720.97	1663.85	1613.77	1547.91	1484.95	1426.35	1368.01	1313.62	1252.41	1195.54	1139.15	1086.3	1027.96	973.226	917.788	868.546	812.844	760.269	708.463	659.281	607.253	557.9	509.412	463.112	415.112	369.335	324.493	280.596	238.332	195.66	154.625	114.544	75.6339	0
		Fuel	GWh	Residue transportation	208.996	199.928	192.444	183.608	176.962	170.962	164.967	159.39	152.955	146.835	140.726	134.993	128.559	122.506	124.05	122.444	118.611	115.047	111.159	107.307	102.144	97.1126	91.7806	86.4137	79.9928	73.589	66.8331	59.6966	52.398	44.3015	36.0213	27.4326	18.611	0
		Fuel	GWh	Incineration facility	3471.62	3477.65	3539.52	3457.15	3463.46	3459.71	3479.11	3519.11	3524.02	3532.47	3532.51	3538.11	3537.7	3527.55	3469.1	3403.42	3324.41	3240.6	2791.87	2719.91	2640.56	2563.48	2477.13	2457.17	2370.48	2293.82	2200.16	2094.22	2010.04	1922.79	1824.82	1732.62	1646.63	1571.09
		Fuel	GWh	Bulk waste treatment facility	46.0939	45.9982	45.8978	45.5914	45.4137	45.2223	45.0187	44.8042	44.5798	44.3466	44.1053	43.8563	43.5998	43.3361	43.0651	42.7871	42.5023	42.2111	41.9139	41.6108	41.3024	40.9892	40.6717	40.3506	40.0265	39.7002	39.3723	39.0435	38.7145	38.3858	38.0577	37.7304	37.4039	37.0782
		Fuel	GWh	Composting facility	38.874	37.319	37.319	37.0772	36.7289	36.4711	36.2034	36.0266	35.6422	35.3504	35.052	34.8451	34.4366	34.12	33.9067	33.7801	33.4636	33.2343	33.0003	32.8514	32.5188	32.2722	32.0223	31.8565	31.5143	31.2573	30.9992	30.7403	30.5648	30.2225	29.9642	29.7065	29.5301	29.193
		Fuel	GWh	Feed production facility	11.9034	11.9034	11.9034	11.9034	11.9034	11.9034	11.9034	11.9034	11.9034	11.9034	11.9034	11.9034	11.9034	11.9034	11.9034	11.9034	11.9034	11.9034	11.9034	11.9034	11.9034	11.9034	11.9034	11.9034	11.9034	11.9034	11.9034	11.9034	11.9034	11.9034	11.9034	11.9034	11.9034	11.9034
		Fuel	GWh	Other resource recovery facilities	103.417	99.1994	94.7195	91.863	92.9255	94.3861	95.8486	97.7427	98.8307	100.083	101.357	103.072	103.993	105.366	128.714	145.528	158.107	172.156	186.246	201.528	213.982	227.887	241.82	257.196	269.675	283.584	297.479	311.373	326.517	337.887	350.051	361.817	374.539	384.075
		Fuel	GWh	Material recycling after incineration	335.896	335.141	339.643	335.732	332.019	329.116	326.122	323.951	319.91	316.767	313.564	311.186	306.989	303.622	297.52	291.915	284.442	277.501	270.533	264.16	256.682	249.727	242.755	236.29	228.798	221.823	214.848	207.868	201.418	193.952	186.999	180.044	173.61	166.204
		Fuel	GWh	Refuse fuel production facility	410.745	414.876	414.068	390.518	382.157	374.827	367.37	361.065	352.248	345.396	338.461	332.671	324.361	317.198	319.442	322.239	311.254	302.416	293.514	281.107	266.216	252.487	238.714	226.078	211.057	197.189	183.304	169.41	156.643	141.62	127.733	113.855	101.076	86.1233
		Fuel	GWh	Other facilities	2.21509	2.21509	2.21509	2.21509	2.21509	2.21509	2.21509	2.21509	2.21509	2.21509	2.21509	2.21509	2.21509	2.21509	2.21509	2.21509	2.21509	2.21509	2.21509	2.21509	2.21509	2.21509	2.21509	2.21509	2.21509	2.21509	2.21509	2.21509	2.21509	2.21509	2.21509	2.21509	2.21509	2.21509
		Fuel	GWh	Landfill site	91.9851	91.9121	91.3342	89.8421	88.4337	87.2341	86.0114	85.0006	83.508	82.7669	82.0105	81.467	80.4543	79.6553	78.4709	77.6111	76.1735	74.9114	73.6403	72.5934	71.1793	69.9377	68.6898	67.6101	66.1818	64.9243	63.6653	62.4048	61.3141	59.8887	58.632	57.3759	56.286	54.8742
		Fuel	GWh	Human waste treatment plant and sludge treatment center	595.83	583.226	573.153	566.629	551.068	540.471	530.111	519.878	510.668	500.549	492.249	482.463	474.416	466.951	450.327	433.229	416.571	398.126	381.504	367.418	351.885	337.155	320.066	306.071	292.035	276.883	261.601	246.625	234.646	217.908	207.56	196.802	184.62	174.866
		Fuel	GWh	Community plant	0.0329593	0.032605	0.0326033	0.0327966	0.0320175	0.0319008	0.031884	0.0318577	0.0318232	0.0317817	0.0317339	0.0316802	0.0316204	0.0315541	0.0313568	0.0311544	0.030947	0.030735	0.0305185	0.0302979	0.0300733	0.0298452	0.0296141	0.0293803	0.0291443	0.0289067	0.0286679	0.0284286	0.028189	0.0279497	0.0277108	0.0274724	0.0272347	0.0269976
					2017	2018	2019	2020	2021	2022	2023	2024	2025	2026	2027	2028	2029	2030	2031	2032	2033	2034	2035	2036	2037	2038	2039	2040	2041	2042	2043	2044	2045	2046	2047	2048	2049	2050
		Power receiving+Fuel	GWh	Collection	1730.52	1682.88	1642.32	1585.6	1531.65	1482.04	1432.55	1387.07	1334.22	1285.78	1237.68	1193.25	1142.59	1095.66	1047.68	1006.57	957.71	912.175	867.221	825.161	779.142	736.064	693.659	653.786	610.947	570.678	531.157	492.397	455.71	417.192	380.758	345.104	311.131	245.919
		Power receiving+Fuel	GWh	Residue transportation	212.468	203.294	195.698	186.787	180.164	174.197	168.236	162.703	156.292	150.2	144.119	138.426	132.01	125.988	128.109	126.918	123.393	120.175	116.633	113.157	108.299	103.61	98.6202	93.6316	87.5168	81.4547	75.0403	68.2452	61.3193	53.5014	45.5198	37.2197	28.7106	10.3345
		Power receiving+Fuel	GWh	Incineration facility	6149.38	6071.79	6058.07	5885.7	5811.85	5722.75	5659.35	5614.84	5526.26	5442.93	5351.22	5266.31	5178.12	5074.01	4935.68	4788.09	4630.32	4480.58	3398.79	3304.57	3206.61	3101.5	2983	2950.87	2870.78	2803.53	2718.53	2624.37	2598.35	2544.53	2480.82	2399.61	2324.51	2300.32
		Power receiving+Fuel	GWh	Bulk waste treatment facility	233.385	232.9	232.392	230.841	229.941	228.972	227.941	226.855	225.719	224.538	223.316	222.055	220.757	219.421	218.049	216.642	215.2	213.725	212.22	210.686	209.124	207.538	205.931	204.305	202.664	201.012	199.352	197.687	196.021	194.357	192.696	191.039	189.386	187.736
		Power receiving+Fuel	GWh	Composting facility	128.189	123.061	123.061	122.264	121.115	120.265	119.382	118.799	117.532	116.57	115.586	114.903	113.556	112.512	111.809	111.391	110.348	109.592	108.82	108.329	107.232	106.419	105.595	105.048	103.92	103.073	102.221	101.368	100.789	99.6602	98.8083	97.9585	97.377	96.2652
		Power receiving+Fuel	GWh	Feed production facility	40.0055	40.0055	40.0055	40.0055	40.0055	40.0055	40.0055	40.0055	40.0055	40.0055	40.0055	40.0055	40.0055	40.0055	40.0055	40.0055	40.0055	40.0055	40.0055	40.0055	40.0055	40.0055	40.0055	40.0055	40.0055	40.0055	40.0055	40.0055	40.0055	40.0055	40.0055	40.0055	40.0055	40.0055
		Power receiving+Fuel	GWh	Other resource recovery facilities	354.112	339.67	324.33	314.549	318.187	323.188	328.196	334.682	338.407	342.693	347.057	352.928	356.084	360.786	440.73	498.303	541.375	589.479	637.727	690.053	732.698	780.308	828.017	880.666	923.396	971.024	1018.6	1066.18	1118.03	1156.96	1198.61	1238.9	1282.46	1315.12
		Power receiving+Fuel	GWh	Material recycling after incineration	366.153	365.33	370.237	365.974	361.926	358.761	355.498	353.131	348.727	345.3	341.809	339.217	334.642	330.971	324.32	318.21	310.063	302.498	294.902	287.955	279.804	272.222	264.622	257.575	249.407	241.804	234.201	226.592	219.561	211.422	203.844	196.262	189.249	181.175
		Power receiving+Fuel	GWh	Refuse fuel production facility	538.612	547.293	543.509	513.545	502.819	493.455	483.927	475.914	464.59	455.634	446.569	439.012	428.136	418.772	429.996	442.577	434.432	430.104	426.694	421.054	411.31	400.777	390.724	382.893	370.535	359.162	350.481	339.382	328.814	315.903	303.802	291.319	278.877	261.164
		Power receiving+Fuel	GWh	Other facilities	22.0532	22.0532	22.0532	22.0532	22.0532	22.0532	22.0532	22.0532	22.0532	22.0532	22.0532	22.0532	22.0532	22.0532	22.0532	22.0532	22.0532	22.0532	22.0532	22.0532	22.0532	22.0532	22.0532	22.0532	22.0532	22.0532	22.0532	22.0532	22.0532	22.0532	22.0532	22.0532	22.0532	22.0532
		Power receiving+Fuel	GWh	Landfill site	248.177	247.98	246.421	242.395	238.595	235.359	232.06	229.333	225.306	223.307	221.266	219.799	217.067	214.911	211.716	209.396	205.517	202.112	198.683	195.858	192.043	188.693	185.326	182.413	178.56	175.167	171.77	168.369	165.427	161.581	158.19	154.801	151.861	148.051
		Power receiving+Fuel	GWh	Human waste treatment plant and sludge treatment center	1550.18	1517.81	1501.96	1493.39	1454.86	1435.05	1418.58	1403.01	1387.92	1372.12	1357.88	1345.04	1335.04	1328.19	1292.7	1258.83	1225.48	1186.09	1150.24	1119.21	1085.82	1053.5	1017.98	987.669	954.193	922.475	887.426	855.427	826.256	791.087	765.653	738.809	710.918	688.65
		Power receiving+Fuel	GWh	Community plant	244.659	244.151	243.618	241.993	241.048	240.033	238.952	237.814	236.623	235.385	234.104	232.783	231.422	230.022	228.584	227.108	225.597	224.051	222.473	220.864	219.227	217.565	215.88	214.176	212.455	210.723	208.983	207.238	205.491	203.747	202.005	200.268	198.535	196.806
				Energy supply (electricity and heat)	-5947.54	-6004.78	-6442.22	-6555.24	-6635.44	-6753.42	-6870.29	-7014.09	-7098.27	-7218.97	-7325.92	-7450.41	-7490.29	-7551.5	-7782.41	-8041.09	-8124.57	-8158.93	-9257.68	-9038.56	-8745.68	-8249.65	-7731.78	-7413.08	-6768.02	-6149.58	-5615.94	-5089.29	-4064.23	-3656.98	-3297.63	-2946.29	-2549.75	-2200.28
				Energy balance	5870.36	5633.43	5101.46	4689.85	4418.77	4122.71	3856.44	3592.12	3325.39	3037.55	2756.74	2475.38	2261.19	2021.81	1649.02	1225	916.926	673.71	-1561.21	-1479.6	-1352.31	-1019.39	-680.363	-437.987	58.4124	552.574	943.882	1320.02	2273.6	2555.02	2795.13	3007.06	3275.33	3493.31
		Electric power transmission	GWh	Incineration facility	5100.19	5173.92	5603.67	5727.26	5824.19	5951.77	6079.82	6228.57	6324.25	6452.48	6571.74	6697.11	6755.6	6833.43	6820.47	6824.86	6681	6490.05	7309.25	6981.44	6590.36	6229.17	5861.32	5465.77	4979.42	4508.28	4036	3579.44	2709.51	2372.83	2079.85	1776.9	1443.59	1171.84
		Electric power transmission	GWh	Methane fermentation facility	0	4.41598	0.729043	1.96975	2.29073	2.62775	2.96491	3.31061	3.63228	3.67091	3.70957	3.7574	3.78699	3.82575	23.1814	44.5035	63.1447	80.5123	100.278	126.699	150.098	167.963	187.119	208.021	225.576	242.179	263.383	280.415	295.183	311.419	326.032	339.704	350.023	354.555
		External heat supply	GWh	External heat supply	847.348	826.448	837.821	826.017	808.965	799.028	787.5	782.211	770.394	762.82	750.474	749.542	730.903	714.245	938.759	1171.73	1380.43	1588.37	1848.15	1930.42	2005.22	1852.52	1683.34	1739.29	1563.02	1399.13	1316.55	1229.43	1059.53	972.731	891.755	829.683	756.129	673.889

## Sheet: Maximum actions
					Fiscal Year
					2017	2018	2019	2020	2021	2022	2023	2024	2025	2026	2027	2028	2029	2030	2031	2032	2033	2034	2035	2036	2037	2038	2039	2040	2041	2042	2043	2044	2045	2046	2047	2048	2049	2050
		Waste	kt	Collection	37007	36862.9	36870.7	36506.8	36189.3	35959.9	35720.7	35571	35218	34963.5	34702.4	34531.3	34162.1	33883.2	33550.7	33421.7	33016	32697	32373.3	32134.3	31712.6	31376.4	31036.9	30781.1	30349.7	30003.2	29655.5	29307.1	29041.7	28610.2	28262.4	27915.1	27648.8	27222.5
		Waste	kt	Incineration facility	34247	34170	34629	34230.3	33851.6	33555.6	33250.4	33029	32617.1	32296.6	31970	31727.6	31299.7	30956.3	30334.3	29629.5	28717.6	27875.9	27047.4	26267.6	25354.5	24508.7	23698.8	22918.7	22024.6	21215	20407.3	19564.6	18812.8	17965.8	17155.6	16358.7	15618.6	14798.5
		Waste	kt	Bulk waste treatment facility	1749.87	1746.23	1742.42	1730.79	1724.04	1716.78	1709.05	1700.9	1692.39	1683.53	1674.37	1664.92	1655.18	1645.17	1634.88	1624.33	1613.52	1602.46	1591.18	1579.67	1567.97	1556.08	1544.02	1531.83	1519.53	1507.14	1494.69	1482.21	1469.72	1457.24	1444.79	1432.36	1419.97	1407.6
		Waste	kt	Composting facility	225	216	216	214.6	212.584	211.093	209.543	208.52	206.295	204.606	202.879	201.681	199.317	197.484	196.25	195.517	193.685	192.358	191.003	190.142	188.217	186.79	185.343	184.383	182.403	180.916	179.421	177.923	176.907	174.926	173.431	171.939	170.919	168.967
		Waste	kt	Feed production facility	12	12	12	12	12	12	12	12	12	12	12	12	12	12	12	12	12	12	12	12	12	12	12	12	12	12	12	12	12	12	12	12	12	12
		Waste	kt	Other resource recovery facilities	2819.1	2704.12	2582.01	2504.14	2533.1	2572.92	2612.78	2664.42	2694.08	2728.2	2762.94	2809.68	2834.8	2872.23	3508.67	3967.02	4309.91	4692.87	5076.98	5493.54	5833.05	6212.07	6591.88	7011.02	7351.2	7730.37	8109.12	8487.87	8900.68	9210.62	9542.22	9862.95	10209.7	10469.7
		Waste	kt	Material recycling after incineration	1225.35	1222.6	1239.02	1224.76	1211.21	1200.62	1189.7	1181.78	1167.04	1155.57	1143.88	1135.21	1119.9	1107.61	1085.36	1064.91	1037.65	1012.33	986.907	963.66	936.38	911.007	885.574	861.989	834.657	809.212	783.769	758.303	734.774	707.538	682.175	656.802	633.333	606.314
		Waste	kt	Refuse fuel production facility	796.174	819.334	667.87	628.701	614.413	602.352	590.094	580.233	565.246	546.503	527.631	511.132	489.526	470.3	586.867	737.237	852.582	953.659	1066.88	1200.22	1315.61	1395.28	1496.74	1609.41	1686.35	1763.42	1874.81	1949.43	2017.49	2097.32	2165.51	2230.12	2277.31	2283.36
		Waste	kt	Other facilities	61	61	61	61	61	61	61	61	61	61	61	61	61	61	61	61	61	61	61	61	61	61	61	61	61	61	61	61	61	61	61	61	61	61
		Waste	kt	Landfill site	4075.42	4072.18	4046.58	3980.47	3918.07	3864.93	3810.75	3765.97	3699.84	3667	3633.49	3609.41	3564.54	3529.15	3476.67	3438.58	3374.88	3318.96	3262.65	3216.27	3153.61	3098.6	3043.31	2995.48	2932.2	2876.48	2820.71	2764.85	2716.53	2653.38	2597.7	2542.05	2493.76	2431.21
		Human waste	kl	Human waste treatment plant and sludge treatment center	19163	18957	18956	19068.4	18615.4	18547.6	18537.8	18522.5	18502.5	18478.3	18450.5	18419.3	18384.5	18346	18231.3	18113.6	17993	17869.7	17743.9	17615.6	17485	17352.4	17218	17082.1	16944.9	16806.7	16667.9	16528.8	16389.5	16250.3	16111.4	15972.9	15834.7	15696.8
		Human waste	kl	Community plant	19531.9	19491.3	19448.8	19319	19243.6	19162.6	19076.3	18985.4	18890.3	18791.5	18689.2	18583.7	18475	18363.3	18248.5	18130.7	18010	17886.6	17760.6	17632.2	17501.5	17368.8	17234.3	17098.2	16960.9	16822.6	16683.7	16544.4	16405	16265.7	16126.6	15987.9	15849.6	15711.6
					Fiscal Year
					2017	2018	2019	2020	2021	2022	2023	2024	2025	2026	2027	2028	2029	2030	2031	2032	2033	2034	2035	2036	2037	2038	2039	2040	2041	2042	2043	2044	2045	2046	2047	2048	2049	2050
		Power receiving	MWh	Collection	9551.67	19029	28549.5	37690.2	46703.1	55688.4	64537.7	73448.2	81809.2	90242.1	98525.2	106952	114626	122435	129894	138021	144867	151906	158758	165880	171888	178164	184247	190673	195835	201343	206664	211800	217377	221533	226134	230560	235497	245919
		Power receiving	MWh	Residue transportation	3472.04	3365.95	3253.87	3178.67	3201.56	3235.27	3268.99	3313.23	3337.2	3365.08	3393.35	3432.45	3451.61	3481.89	4059.11	4473.55	4782.36	5127.74	5474.12	5850.16	6155.64	6497.26	6839.59	7217.92	7523.95	7865.73	8207.15	8548.61	8921.36	9199.94	9498.43	9787.05	10099.6	10334.5
		Power receiving	MWh	Incineration facility	2.67776e+06	2.59414e+06	2.51855e+06	2.42855e+06	2.34839e+06	2.26304e+06	2.18024e+06	2.09573e+06	2.00224e+06	1.91046e+06	1.81872e+06	1.7282e+06	1.64042e+06	1.54646e+06	1.46658e+06	1.38467e+06	1.30591e+06	1.23998e+06	606923	584662	566051	538021	505869	480017	745798	932155	1.08194e+06	1.21976e+06	1.35233e+06	1.41042e+06	1.45302e+06	1.44582e+06	1.42174e+06	1.43392e+06
		Power receiving	MWh	Bulk waste treatment facility	187291	186902	186494	185249	184527	183750	182922	182051	181139	180192	179211	178199	177157	176085	174984	173855	172698	171514	170307	169075	167822	166549	165259	163955	162638	161312	159979	158644	157307	155971	154638	153308	151982	150658
		Power receiving	MWh	Composting facility	89314.8	85742.2	85742.2	85186.5	84386.3	83794.1	83179.1	82772.9	81889.6	81219.3	80533.7	80058.2	79119.8	78392.3	77902.2	77611.4	76884.2	76357.4	75819.7	75477.6	74713.5	74147	73572.7	73191.8	72405.6	71815.2	71222.1	70627.4	70224.1	69437.6	68844.1	68252	67846.9	67072.2
		Power receiving	MWh	Feed production facility	28102.2	28102.2	28102.2	28102.2	28102.2	28102.2	28102.2	28102.2	28102.2	28102.2	28102.2	28102.2	28102.2	28102.2	28102.2	28102.2	28102.2	28102.2	28102.2	28102.2	28102.2	28102.2	28102.2	28102.2	28102.2	28102.2	28102.2	28102.2	28102.2	28102.2	28102.2	28102.2	28102.2	28102.2
		Power receiving	MWh	Other resource recovery facilities	250694	240470	229610	222686	225262	228802	232347	236939	239576	242611	245700	249857	252091	255420	312016	352776	383268	417324	451481	488525	518716	552422	586198	623471	653721	687440	721121	754802	791513	819074	848562	877084	907923	931040
		Power receiving	MWh	Material recycling after incineration	30256.6	30188.6	30594.1	30241.8	29907.3	29645.8	29376.2	29180.5	28816.6	28533.5	28244.9	28030.8	27652.7	27349.4	26799.8	26294.8	25621.7	24996.5	24368.8	23794.8	23121.2	22494.7	21866.7	21284.3	20609.5	19981.2	19352.9	18724.1	18143.1	17470.6	16844.4	16217.8	15638.3	14971.2
		Power receiving	MWh	Refuse fuel production facility	127868	132418	129441	123027	120662	118629	116557	114849	112342	110238	108107	106340	103775	101574	110554	120339	123179	127688	133180	139948	145094	148289	152010	156815	159478	161973	167177	169972	172172	174283	176069	177465	177801	175040
		Power receiving	MWh	Other facilities	19838.1	19838.1	19838.1	19838.1	19838.1	19838.1	19838.1	19838.1	19838.1	19838.1	19838.1	19838.1	19838.1	19838.1	19838.1	19838.1	19838.1	19838.1	19838.1	19838.1	19838.1	19838.1	19838.1	19838.1	19838.1	19838.1	19838.1	19838.1	19838.1	19838.1	19838.1	19838.1	19838.1	19838.1
		Power receiving	MWh	Landfill site	156192	156068	155087	152553	150162	148125	146049	144333	141798	140540	139255	138332	136613	135256	133245	131785	129344	127201	125043	123265	120864	118755	116636	114803	112378	110243	108105	105964	104112	101692	99558.1	97425.2	95574.6	93177.3
		Power receiving	MWh	Human waste treatment plant and sludge treatment center	954352	934583	928806	926761	903790	894583	888472	883136	877255	871571	865627	862581	860626	861243	842375	825596	808912	787964	768738	751788	733932	716345	697915	681598	662158	645591	625825	608802	591610	573180	558093	542007	526298	513784
		Power receiving	MWh	Community plant	244626	244119	243586	241960	241016	240001	238920	237782	236591	235354	234073	232751	231390	229990	228552	227077	225566	224020	222442	220834	219197	217535	215850	214146	212426	210694	208954	207209	205463	203719	201977	200240	198508	196779
					2017	2018	2019	2020	2021	2022	2023	2024	2025	2026	2027	2028	2029	2030	2031	2032	2033	2034	2035	2036	2037	2038	2039	2040	2041	2042	2043	2044	2045	2046	2047	2048	2049	2050
		Fuel	GJ	Collection	6.19549e+06	5.98986e+06	5.80957e+06	5.57247e+06	5.34582e+06	5.13487e+06	4.92483e+06	4.72903e+06	4.50869e+06	4.30395e+06	4.10094e+06	3.91069e+06	3.70067e+06	3.50361e+06	3.30404e+06	3.12677e+06	2.92624e+06	2.73697e+06	2.55047e+06	2.37341e+06	2.18611e+06	2.00844e+06	1.83388e+06	1.6672e+06	1.4944e+06	1.32961e+06	1.16818e+06	1.01015e+06	857996	704375	556649	412357	272282	0
		Fuel	GJ	Residue transportation	752387	719742	692798	660990	637063	615462	593881	573805	550638	528605	506614	485976	462812	441021	446581	440800	426999	414169	400173	386305	367717	349605	330410	311089	287974	264920	240599	214908	188633	159485	129677	98757.4	66999.5	0
		Fuel	GJ	Incineration facility	1.24978e+07	1.25195e+07	1.27423e+07	1.24457e+07	1.24685e+07	1.2455e+07	1.25248e+07	1.26688e+07	1.26865e+07	1.27169e+07	1.2717e+07	1.27372e+07	1.27357e+07	1.26992e+07	1.24887e+07	1.22523e+07	1.19679e+07	1.16662e+07	1.00507e+07	9.79168e+06	9.50602e+06	9.22853e+06	8.91768e+06	8.84358e+06	8.53147e+06	8.25544e+06	7.91829e+06	7.53695e+06	7.23387e+06	6.91977e+06	6.56709e+06	6.23511e+06	5.92558e+06	5.65359e+06
		Fuel	GJ	Bulk waste treatment facility	165938	165593	165232	164129	163489	162800	162067	161295	160487	159648	158779	157883	156959	156010	155034	154034	153008	151960	150890	149799	148689	147561	146418	145262	144095	142921	141740	140557	139372	138189	137008	135829	134654	133481
		Fuel	GJ	Composting facility	139946	134348	134348	133478	132224	131296	130332	129696	128312	127262	126187	125442	123972	122832	122064	121608	120469	119643	118801	118265	117068	116180	115280	114683	113451	112526	111597	110665	110033	108801	107871	106943	106308	105095
		Fuel	GJ	Feed production facility	42852.1	42852.1	42852.1	42852.1	42852.1	42852.1	42852.1	42852.1	42852.1	42852.1	42852.1	42852.1	42852.1	42852.1	42852.1	42852.1	42852.1	42852.1	42852.1	42852.1	42852.1	42852.1	42852.1	42852.1	42852.1	42852.1	42852.1	42852.1	42852.1	42852.1	42852.1	42852.1	42852.1	42852.1
		Fuel	GJ	Other resource recovery facilities	372302	357118	340990	330707	334532	339790	345055	351874	355791	360297	364885	371058	374376	379319	463369	523900	569185	619760	670486	725500	770336	820391	870551	925905	970829	1.0209e+06	1.07092e+06	1.12094e+06	1.17546e+06	1.21639e+06	1.26018e+06	1.30254e+06	1.34834e+06	1.38267e+06
		Fuel	GJ	Material recycling after incineration	1.20923e+06	1.20651e+06	1.22272e+06	1.20864e+06	1.19527e+06	1.18482e+06	1.17404e+06	1.16622e+06	1.15168e+06	1.14036e+06	1.12883e+06	1.12027e+06	1.10516e+06	1.09304e+06	1.07107e+06	1.05089e+06	1.02399e+06	999005	973918	950977	924057	899018	873920	850645	823673	798562	773454	748323	725104	698226	673197	648158	624998	598334
		Fuel	GJ	Refuse fuel production facility	1.47868e+06	1.49355e+06	1.49064e+06	1.40586e+06	1.37577e+06	1.34938e+06	1.32253e+06	1.29983e+06	1.26809e+06	1.24343e+06	1.21846e+06	1.19762e+06	1.1677e+06	1.14191e+06	1.14999e+06	1.16006e+06	1.12051e+06	1.0887e+06	1.05665e+06	1.01198e+06	958377	908955	859370	813881	759806	709879	659894	609876	563913	509833	459839	409877	363873	310044
		Fuel	GJ	Other facilities	7974.31	7974.31	7974.31	7974.31	7974.31	7974.31	7974.31	7974.31	7974.31	7974.31	7974.31	7974.31	7974.31	7974.31	7974.31	7974.31	7974.31	7974.31	7974.31	7974.31	7974.31	7974.31	7974.31	7974.31	7974.31	7974.31	7974.31	7974.31	7974.31	7974.31	7974.31	7974.31	7974.31	7974.31
		Fuel	GJ	Landfill site	331146	330884	328803	323431	318361	314043	309641	306002	300629	297961	295238	293281	289635	286759	282495	279400	274224	269681	265105	261336	256246	251776	247283	243396	238254	233728	229195	224657	220731	215599	211075	206553	202630	197547
		Fuel	GJ	Human waste treatment plant and sludge treatment center	2.14499e+06	2.09961e+06	2.06335e+06	2.03987e+06	1.98384e+06	1.94569e+06	1.9084e+06	1.87156e+06	1.83841e+06	1.80198e+06	1.7721e+06	1.73687e+06	1.7079e+06	1.68102e+06	1.62118e+06	1.55963e+06	1.49966e+06	1.43325e+06	1.37342e+06	1.3227e+06	1.26679e+06	1.21376e+06	1.15224e+06	1.10185e+06	1.05133e+06	996780	941764	887850	844725	784467	747217	708487	664632	629517
		Fuel	GJ	Community plant	118.654	117.378	117.372	118.068	115.263	114.843	114.783	114.688	114.564	114.414	114.242	114.049	113.833	113.595	112.884	112.156	111.409	110.646	109.867	109.072	108.264	107.443	106.611	105.769	104.92	104.064	103.205	102.343	101.48	100.619	99.7588	98.9008	98.0451	97.1912
		Electric power transmission	MWh	Incineration facility	5.10019e+06	5.17392e+06	5.60367e+06	5.72726e+06	5.82419e+06	5.95177e+06	6.07982e+06	6.22857e+06	6.32425e+06	6.45248e+06	6.57174e+06	6.69711e+06	6.7556e+06	6.83343e+06	6.82047e+06	6.82486e+06	6.681e+06	6.49005e+06	7.30925e+06	6.98144e+06	6.59036e+06	6.22917e+06	5.86132e+06	5.46577e+06	4.61829e+06	4.01702e+06	3.42657e+06	2.84789e+06	1.91273e+06	1.53762e+06	1.22226e+06	920964	635085	350501
		Electric power transmission	MWh	Methane fermentation facility	0	4415.98	729.043	1969.75	2290.73	2627.75	2964.91	3310.61	3632.28	3670.91	3709.57	3757.4	3786.99	3825.75	23181.4	44503.5	63144.7	80512.3	100278	126699	150098	167963	187119	208021	225576	242179	263383	280415	295183	311419	326032	339704	350023	354555
		External heat supply	GJ	External heat supply	3.05045e+06	2.97521e+06	3.01616e+06	2.97366e+06	2.91227e+06	2.8765e+06	2.835e+06	2.81596e+06	2.77342e+06	2.74615e+06	2.70171e+06	2.69835e+06	2.63125e+06	2.57128e+06	3.37953e+06	4.21821e+06	4.96955e+06	5.71813e+06	6.65335e+06	6.94953e+06	7.21878e+06	6.66906e+06	6.06002e+06	5.49191e+06	4.85446e+06	4.25822e+06	3.98226e+06	3.71048e+06	3.40137e+06	3.10749e+06	2.83298e+06	2.62238e+06	2.38251e+06	2.15747e+06
					2017	2018	2019	2020	2021	2022	2023	2024	2025	2026	2027	2028	2029	2030	2031	2032	2033	2034	2035	2036	2037	2038	2039	2040	2041	2042	2043	2044	2045	2046	2047	2048	2049	2050
		Power receiving	GWh	Collection	9.55167	19.029	28.5495	37.6902	46.7031	55.6884	64.5377	73.4482	81.8092	90.2421	98.5252	106.952	114.626	122.435	129.894	138.021	144.867	151.906	158.758	165.88	171.888	178.164	184.247	190.673	195.835	201.343	206.664	211.8	217.377	221.533	226.134	230.56	235.497	245.919
		Power receiving	GWh	Residue transportation	3.47204	3.36595	3.25387	3.17867	3.20156	3.23527	3.26899	3.31323	3.3372	3.36508	3.39335	3.43245	3.45161	3.48189	4.05911	4.47355	4.78236	5.12774	5.47412	5.85016	6.15564	6.49726	6.83959	7.21792	7.52395	7.86573	8.20715	8.54861	8.92136	9.19994	9.49843	9.78705	10.0996	10.3345
		Power receiving	GWh	Incineration facility	2677.76	2594.14	2518.55	2428.55	2348.39	2263.04	2180.24	2095.73	2002.24	1910.46	1818.72	1728.2	1640.42	1546.46	1466.58	1384.67	1305.91	1239.98	606.923	584.662	566.051	538.021	505.869	480.017	745.798	932.155	1081.94	1219.76	1352.33	1410.42	1453.02	1445.82	1421.74	1433.92
		Power receiving	GWh	Bulk waste treatment facility	187.291	186.902	186.494	185.249	184.527	183.75	182.922	182.051	181.139	180.192	179.211	178.199	177.157	176.085	174.984	173.855	172.698	171.514	170.307	169.075	167.822	166.549	165.259	163.955	162.638	161.312	159.979	158.644	157.307	155.971	154.638	153.308	151.982	150.658
		Power receiving	GWh	Composting facility	89.3148	85.7422	85.7422	85.1865	84.3863	83.7941	83.1791	82.7729	81.8896	81.2193	80.5337	80.0582	79.1198	78.3923	77.9022	77.6114	76.8842	76.3574	75.8197	75.4776	74.7135	74.147	73.5727	73.1918	72.4056	71.8152	71.2221	70.6274	70.2241	69.4376	68.8441	68.252	67.8469	67.0722
		Power receiving	GWh	Feed production facility	28.1022	28.1022	28.1022	28.1022	28.1022	28.1022	28.1022	28.1022	28.1022	28.1022	28.1022	28.1022	28.1022	28.1022	28.1022	28.1022	28.1022	28.1022	28.1022	28.1022	28.1022	28.1022	28.1022	28.1022	28.1022	28.1022	28.1022	28.1022	28.1022	28.1022	28.1022	28.1022	28.1022	28.1022
		Power receiving	GWh	Other resource recovery facilities	250.694	240.47	229.61	222.686	225.262	228.802	232.347	236.939	239.576	242.611	245.7	249.857	252.091	255.42	312.016	352.776	383.268	417.324	451.481	488.525	518.716	552.422	586.198	623.471	653.721	687.44	721.121	754.802	791.513	819.074	848.562	877.084	907.923	931.04
		Power receiving	GWh	Material recycling after incineration	30.2566	30.1886	30.5941	30.2418	29.9073	29.6458	29.3762	29.1805	28.8166	28.5335	28.2449	28.0308	27.6527	27.3494	26.7998	26.2948	25.6217	24.9965	24.3688	23.7948	23.1212	22.4947	21.8667	21.2843	20.6095	19.9812	19.3529	18.7241	18.1431	17.4706	16.8444	16.2178	15.6383	14.9712
		Power receiving	GWh	Refuse fuel production facility	127.868	132.418	129.441	123.027	120.662	118.629	116.557	114.849	112.342	110.238	108.107	106.34	103.775	101.574	110.554	120.339	123.179	127.688	133.18	139.948	145.094	148.289	152.01	156.815	159.478	161.973	167.177	169.972	172.172	174.283	176.069	177.465	177.801	175.04
		Power receiving	GWh	Other facilities	19.8381	19.8381	19.8381	19.8381	19.8381	19.8381	19.8381	19.8381	19.8381	19.8381	19.8381	19.8381	19.8381	19.8381	19.8381	19.8381	19.8381	19.8381	19.8381	19.8381	19.8381	19.8381	19.8381	19.8381	19.8381	19.8381	19.8381	19.8381	19.8381	19.8381	19.8381	19.8381	19.8381	19.8381
		Power receiving	GWh	Landfill site	156.192	156.068	155.087	152.553	150.162	148.125	146.049	144.333	141.798	140.54	139.255	138.332	136.613	135.256	133.245	131.785	129.344	127.201	125.043	123.265	120.864	118.755	116.636	114.803	112.378	110.243	108.105	105.964	104.112	101.692	99.5581	97.4252	95.5746	93.1773
		Power receiving	GWh	Human waste treatment plant and sludge treatment center	954.352	934.583	928.806	926.761	903.79	894.583	888.472	883.136	877.255	871.571	865.627	862.581	860.626	861.243	842.375	825.596	808.912	787.964	768.738	751.788	733.932	716.345	697.915	681.598	662.158	645.591	625.825	608.802	591.61	573.18	558.093	542.007	526.298	513.784
		Power receiving	GWh	Community plant	244.626	244.119	243.586	241.96	241.016	240.001	238.92	237.782	236.591	235.354	234.073	232.751	231.39	229.99	228.552	227.077	225.566	224.02	222.442	220.834	219.197	217.535	215.85	214.146	212.426	210.694	208.954	207.209	205.463	203.719	201.977	200.24	198.508	196.779
		Fuel	GWh	Collection	1720.97	1663.85	1613.77	1547.91	1484.95	1426.35	1368.01	1313.62	1252.41	1195.54	1139.15	1086.3	1027.96	973.226	917.788	868.546	812.844	760.269	708.463	659.281	607.253	557.9	509.412	463.112	415.112	369.335	324.493	280.596	238.332	195.66	154.625	114.544	75.6339	0
		Fuel	GWh	Residue transportation	208.996	199.928	192.444	183.608	176.962	170.962	164.967	159.39	152.955	146.835	140.726	134.993	128.559	122.506	124.05	122.444	118.611	115.047	111.159	107.307	102.144	97.1126	91.7806	86.4137	79.9928	73.589	66.8331	59.6966	52.398	44.3015	36.0213	27.4326	18.611	0
		Fuel	GWh	Incineration facility	3471.62	3477.65	3539.52	3457.15	3463.46	3459.71	3479.11	3519.11	3524.02	3532.47	3532.51	3538.11	3537.7	3527.55	3469.1	3403.42	3324.41	3240.6	2791.87	2719.91	2640.56	2563.48	2477.13	2456.55	2369.85	2293.18	2199.53	2093.6	2009.41	1922.16	1824.19	1731.98	1645.99	1570.44
		Fuel	GWh	Bulk waste treatment facility	46.0939	45.9982	45.8978	45.5914	45.4137	45.2223	45.0187	44.8042	44.5798	44.3466	44.1053	43.8563	43.5998	43.3361	43.0651	42.7871	42.5023	42.2111	41.9139	41.6108	41.3024	40.9892	40.6717	40.3506	40.0265	39.7002	39.3723	39.0435	38.7145	38.3858	38.0577	37.7304	37.4039	37.0782
		Fuel	GWh	Composting facility	38.874	37.319	37.319	37.0772	36.7289	36.4711	36.2034	36.0266	35.6422	35.3504	35.052	34.8451	34.4366	34.12	33.9067	33.7801	33.4636	33.2343	33.0003	32.8514	32.5188	32.2722	32.0223	31.8565	31.5143	31.2573	30.9992	30.7403	30.5648	30.2225	29.9642	29.7065	29.5301	29.193
		Fuel	GWh	Feed production facility	11.9034	11.9034	11.9034	11.9034	11.9034	11.9034	11.9034	11.9034	11.9034	11.9034	11.9034	11.9034	11.9034	11.9034	11.9034	11.9034	11.9034	11.9034	11.9034	11.9034	11.9034	11.9034	11.9034	11.9034	11.9034	11.9034	11.9034	11.9034	11.9034	11.9034	11.9034	11.9034	11.9034	11.9034
		Fuel	GWh	Other resource recovery facilities	103.417	99.1994	94.7195	91.863	92.9255	94.3861	95.8486	97.7427	98.8307	100.083	101.357	103.072	103.993	105.366	128.714	145.528	158.107	172.156	186.246	201.528	213.982	227.887	241.82	257.196	269.675	283.584	297.479	311.373	326.517	337.887	350.051	361.817	374.539	384.075
		Fuel	GWh	Material recycling after incineration	335.896	335.141	339.643	335.732	332.019	329.116	326.122	323.951	319.91	316.767	313.564	311.186	306.989	303.622	297.52	291.915	284.442	277.501	270.533	264.16	256.682	249.727	242.755	236.29	228.798	221.823	214.848	207.868	201.418	193.952	186.999	180.044	173.61	166.204
		Fuel	GWh	Refuse fuel production facility	410.745	414.876	414.068	390.518	382.157	374.827	367.37	361.065	352.248	345.396	338.461	332.671	324.361	317.198	319.442	322.239	311.254	302.416	293.514	281.107	266.216	252.487	238.714	226.078	211.057	197.189	183.304	169.41	156.643	141.62	127.733	113.855	101.076	86.1233
		Fuel	GWh	Other facilities	2.21509	2.21509	2.21509	2.21509	2.21509	2.21509	2.21509	2.21509	2.21509	2.21509	2.21509	2.21509	2.21509	2.21509	2.21509	2.21509	2.21509	2.21509	2.21509	2.21509	2.21509	2.21509	2.21509	2.21509	2.21509	2.21509	2.21509	2.21509	2.21509	2.21509	2.21509	2.21509	2.21509	2.21509
		Fuel	GWh	Landfill site	91.9851	91.9121	91.3342	89.8421	88.4337	87.2341	86.0114	85.0006	83.508	82.7669	82.0105	81.467	80.4543	79.6553	78.4709	77.6111	76.1735	74.9114	73.6403	72.5934	71.1793	69.9377	68.6898	67.6101	66.1818	64.9243	63.6653	62.4048	61.3141	59.8887	58.632	57.3759	56.286	54.8742
		Fuel	GWh	Human waste treatment plant and sludge treatment center	595.83	583.226	573.153	566.629	551.068	540.471	530.111	519.878	510.668	500.549	492.249	482.463	474.416	466.951	450.327	433.229	416.571	398.126	381.504	367.418	351.885	337.155	320.066	306.071	292.035	276.883	261.601	246.625	234.646	217.908	207.56	196.802	184.62	174.866
		Fuel	GWh	Community plant	0.0329593	0.032605	0.0326033	0.0327966	0.0320175	0.0319008	0.031884	0.0318577	0.0318232	0.0317817	0.0317339	0.0316802	0.0316204	0.0315541	0.0313568	0.0311544	0.030947	0.030735	0.0305185	0.0302979	0.0300733	0.0298452	0.0296141	0.0293803	0.0291443	0.0289067	0.0286679	0.0284286	0.028189	0.0279497	0.0277108	0.0274724	0.0272347	0.0269976
					2017	2018	2019	2020	2021	2022	2023	2024	2025	2026	2027	2028	2029	2030	2031	2032	2033	2034	2035	2036	2037	2038	2039	2040	2041	2042	2043	2044	2045	2046	2047	2048	2049	2050
		Power receiving+Fuel	GWh	Collection	1730.52	1682.88	1642.32	1585.6	1531.65	1482.04	1432.55	1387.07	1334.22	1285.78	1237.68	1193.25	1142.59	1095.66	1047.68	1006.57	957.71	912.175	867.221	825.161	779.142	736.064	693.659	653.786	610.947	570.678	531.157	492.397	455.71	417.192	380.758	345.104	311.131	245.919
		Power receiving+Fuel	GWh	Residue transportation	212.468	203.294	195.698	186.787	180.164	174.197	168.236	162.703	156.292	150.2	144.119	138.426	132.01	125.988	128.109	126.918	123.393	120.175	116.633	113.157	108.299	103.61	98.6202	93.6316	87.5168	81.4547	75.0403	68.2452	61.3193	53.5014	45.5198	37.2197	28.7106	10.3345
		Power receiving+Fuel	GWh	Incineration facility	6149.38	6071.79	6058.07	5885.7	5811.85	5722.75	5659.35	5614.84	5526.26	5442.93	5351.22	5266.31	5178.12	5074.01	4935.68	4788.09	4630.32	4480.58	3398.79	3304.57	3206.61	3101.5	2983	2936.57	3115.65	3225.33	3281.46	3313.35	3361.74	3332.58	3277.21	3177.8	3067.74	3004.36
		Power receiving+Fuel	GWh	Bulk waste treatment facility	233.385	232.9	232.392	230.841	229.941	228.972	227.941	226.855	225.719	224.538	223.316	222.055	220.757	219.421	218.049	216.642	215.2	213.725	212.22	210.686	209.124	207.538	205.931	204.305	202.664	201.012	199.352	197.687	196.021	194.357	192.696	191.039	189.386	187.736
		Power receiving+Fuel	GWh	Composting facility	128.189	123.061	123.061	122.264	121.115	120.265	119.382	118.799	117.532	116.57	115.586	114.903	113.556	112.512	111.809	111.391	110.348	109.592	108.82	108.329	107.232	106.419	105.595	105.048	103.92	103.073	102.221	101.368	100.789	99.6602	98.8083	97.9585	97.377	96.2652
		Power receiving+Fuel	GWh	Feed production facility	40.0055	40.0055	40.0055	40.0055	40.0055	40.0055	40.0055	40.0055	40.0055	40.0055	40.0055	40.0055	40.0055	40.0055	40.0055	40.0055	40.0055	40.0055	40.0055	40.0055	40.0055	40.0055	40.0055	40.0055	40.0055	40.0055	40.0055	40.0055	40.0055	40.0055	40.0055	40.0055	40.0055	40.0055
		Power receiving+Fuel	GWh	Other resource recovery facilities	354.112	339.67	324.33	314.549	318.187	323.188	328.196	334.682	338.407	342.693	347.057	352.928	356.084	360.786	440.73	498.303	541.375	589.479	637.727	690.053	732.698	780.308	828.017	880.666	923.396	971.024	1018.6	1066.18	1118.03	1156.96	1198.61	1238.9	1282.46	1315.12
		Power receiving+Fuel	GWh	Material recycling after incineration	366.153	365.33	370.237	365.974	361.926	358.761	355.498	353.131	348.727	345.3	341.809	339.217	334.642	330.971	324.32	318.21	310.063	302.498	294.902	287.955	279.804	272.222	264.622	257.575	249.407	241.804	234.201	226.592	219.561	211.422	203.844	196.262	189.249	181.175
		Power receiving+Fuel	GWh	Refuse fuel production facility	538.612	547.293	543.509	513.545	502.819	493.455	483.927	475.914	464.59	455.634	446.569	439.012	428.136	418.772	429.996	442.577	434.432	430.104	426.694	421.054	411.31	400.777	390.724	382.893	370.535	359.162	350.481	339.382	328.814	315.903	303.802	291.319	278.877	261.164
		Power receiving+Fuel	GWh	Other facilities	22.0532	22.0532	22.0532	22.0532	22.0532	22.0532	22.0532	22.0532	22.0532	22.0532	22.0532	22.0532	22.0532	22.0532	22.0532	22.0532	22.0532	22.0532	22.0532	22.0532	22.0532	22.0532	22.0532	22.0532	22.0532	22.0532	22.0532	22.0532	22.0532	22.0532	22.0532	22.0532	22.0532	22.0532
		Power receiving+Fuel	GWh	Landfill site	248.177	247.98	246.421	242.395	238.595	235.359	232.06	229.333	225.306	223.307	221.266	219.799	217.067	214.911	211.716	209.396	205.517	202.112	198.683	195.858	192.043	188.693	185.326	182.413	178.56	175.167	171.77	168.369	165.427	161.581	158.19	154.801	151.861	148.051
		Power receiving+Fuel	GWh	Human waste treatment plant and sludge treatment center	1550.18	1517.81	1501.96	1493.39	1454.86	1435.05	1418.58	1403.01	1387.92	1372.12	1357.88	1345.04	1335.04	1328.19	1292.7	1258.83	1225.48	1186.09	1150.24	1119.21	1085.82	1053.5	1017.98	987.669	954.193	922.475	887.426	855.427	826.256	791.087	765.653	738.809	710.918	688.65
		Power receiving+Fuel	GWh	Community plant	244.659	244.151	243.618	241.993	241.048	240.033	238.952	237.814	236.623	235.385	234.104	232.783	231.422	230.022	228.584	227.108	225.597	224.051	222.473	220.864	219.227	217.565	215.88	214.176	212.455	210.723	208.983	207.238	205.491	203.747	202.005	200.268	198.535	196.806
				Energy supply (electricity and heat)	-5947.54	-6004.78	-6442.22	-6555.24	-6635.44	-6753.42	-6870.29	-7014.09	-7098.27	-7218.97	-7325.92	-7450.41	-7490.29	-7551.5	-7782.41	-8041.09	-8124.57	-8158.93	-9257.68	-9038.56	-8745.68	-8249.65	-7731.78	-7199.32	-6192.33	-5442.04	-4796.13	-4159	-3152.73	-2712.23	-2335.23	-1989.11	-1646.92	-1304.35
				Energy balance	5870.36	5633.43	5101.46	4689.85	4418.77	4122.71	3856.44	3592.12	3325.39	3037.55	2756.74	2475.38	2261.19	2021.81	1649.02	1225	916.926	673.71	-1561.21	-1479.6	-1352.31	-1019.39	-680.363	-238.536	878.975	1681.93	2326.62	2939.29	3948.49	4287.82	4553.93	4742.43	4921.39	5093.28
		Electric power transmission	GWh	Incineration facility	5100.19	5173.92	5603.67	5727.26	5824.19	5951.77	6079.82	6228.57	6324.25	6452.48	6571.74	6697.11	6755.6	6833.43	6820.47	6824.86	6681	6490.05	7309.25	6981.44	6590.36	6229.17	5861.32	5465.77	4618.29	4017.02	3426.57	2847.89	1912.73	1537.62	1222.26	920.964	635.085	350.501
		Electric power transmission	GWh	Methane fermentation facility	0	4.41598	0.729043	1.96975	2.29073	2.62775	2.96491	3.31061	3.63228	3.67091	3.70957	3.7574	3.78699	3.82575	23.1814	44.5035	63.1447	80.5123	100.278	126.699	150.098	167.963	187.119	208.021	225.576	242.179	263.383	280.415	295.183	311.419	326.032	339.704	350.023	354.555
		External heat supply	GWh	External heat supply	847.348	826.448	837.821	826.017	808.965	799.028	787.5	782.211	770.394	762.82	750.474	749.542	730.903	714.245	938.759	1171.73	1380.43	1588.37	1848.15	1930.42	2005.22	1852.52	1683.34	1525.53	1348.46	1182.84	1106.18	1030.69	944.826	863.193	786.939	728.438	661.808	599.297
